# Supplementary material for: Role of lncRNA Has2os in Skeletal Muscle Differentiation and Regeneration
Source: Cells. 2022 Nov 4;11(21):3497. doi: 10.3390/cells11213497 (PMC9655701; doi:10.3390/cells11213497)
Supplement: Supplementary file 1 [file cells-11-03497-s001.zip › Supplementary File 1 Has2os_MAF_file.txt]

##maf version=1
a score=140965.000000
s mm10.chr15                        56689943 16 + 104043685 GCCTTATATGCTATGC
s rn5.chr7                          97076978 16 + 143501887 GCCTCATATTCTATGC
i rn5.chr7                         C 0 C 0
s hetGla2.JH602048                   9045897 16 -  42145720 GCTTCCCTTTATATAT
i hetGla2.JH602048                 C 0 C 0
s cavPor3.scaffold_95                5255075 16 -   5884597 ACTTCCCATTATATAG
i cavPor3.scaffold_95              C 0 C 0
s speTri2.JH393280                  21197633 16 -  46620681 GGCCTGTACCATAAGG
i speTri2.JH393280                 C 0 C 0
s ochPri2.scaffold_3008                36315  6 +    168654 ----------ATATGT
i ochPri2.scaffold_3008            C 0 C 0
s hg19.chr8                        122648097 16 + 146364022 GCCTTAAATCATATGC
i hg19.chr8                        C 0 C 0
s panTro4.chr8                     120285119 16 + 143986469 GCCTTAAATCATATGC
i panTro4.chr8                     C 0 C 0
s ponAbe2.chr8                     129323137 16 + 153482349 GCCTTAAATCATATGC
i ponAbe2.chr8                     C 0 C 0
s nomLeu2.GL397267                  35740922 16 +  48819562 GCCTTAAATCATATGC
i nomLeu2.GL397267                 C 0 C 0
s rheMac3.chr8                     126562399 16 + 150158102 GCCTGAAATCATATGC
i rheMac3.chr8                     I 22 C 0
s papHam1.scaffold1185                 75653 16 +    226188 GCCTTAAATCATATGC
i papHam1.scaffold1185             C 0 C 0
s calJac3.chr16                     23625816 11 -  96796970 GCC-----TTATATGG
i calJac3.chr16                    C 0 C 0
s saiBol1.JH378158                   9047884 16 -  16265076 GCCTTATATTATATGC
i saiBol1.JH378158                 C 0 C 0
s tarSyr1.scaffold_52304               12126 15 +     14295 GCTTCCGGTCACCTG-
i tarSyr1.scaffold_52304           I 22 C 0
s micMur1.scaffold_4913                87583 16 +    135929 ACTTTAAATCATATGT
i micMur1.scaffold_4913            C 0 C 0
s otoGar3.GL873523                  39377909 16 -  47749213 GCTTTACCTCATATGT
i otoGar3.GL873523                 C 0 C 0
s susScr3.chr4                      18483624 16 + 143465943 GGCTCAGATCATATGT
i susScr3.chr4                     C 0 I 1
s bosTau7.chr14                     63540024 16 -  81216349 AGATCAAGTCATATGT
i bosTau7.chr14                    C 0 I 1
s felCat5.chrF2                     64499627 16 +  82763536 GCCTCAAATCATATGT
i felCat5.chrF2                    C 0 I 1
s canFam3.chr13                     20334826 16 +  63241923 AGATCAAATCATATGT
i canFam3.chr13                    C 0 I 1
s ailMel1.GL193711.1                  153648 16 -    529242 GCCTCCAGTCATATGT
i ailMel1.GL193711.1               C 0 I 1
s triMan1.JH594628                   9781105 16 +  24477914 GCCTCAAATCATATGT
i triMan1.JH594628                 C 0 C 0
s dasNov3.JH579962                   3294238 16 +   3334091 GCTTCAAATCATATGT
i dasNov3.JH579962                 I 25 C 0
s choHof1.scaffold_1338                22354 13 +     46317 ATGACAATTT---TGT
i choHof1.scaffold_1338            I 10 C 0
e sorAra1.scaffold_245118              29209 7774 +     38740 I
e echTel1.scaffold_246123               4312 4388 -     12816 I
e oryCun2.chr3                     137513695 1376 + 155691105 I
e myoLuc2.GL429784                   8889536 2040 +  14577598 I
e gorGor3.chr8                     121284328 8675 + 145327772 T
e loxAfr3.scaffold_8                67679239 3044 +  85640724 I
e equCab2.chr9                      64363182 1228 +  83561422 I
e pteVam1.scaffold_9062                51215 1943 +     66173 I
e oviAri1.chr9                      68467306 2667 - 100831284 I
e vicPac1.scaffold_13                1514965 58 +   2369290 I
e melGal1.chr3                      88078472 9551 + 100405168 I
e sarHar1.chr2_GL841388_random        481984 12896 +   1237177 I
e melUnd1.JH556481                    782640 58368 +   3508697 I
e turTru2.JH479543                     20044 2626 -    135452 I
e monDom5.chr3                     395438024 14746 + 527952102 I
e proCap1.scaffold_5125                48935 1945 +     62060 I
e chrPic1.JH584538                    404458 7740 +   8176890 I
e tupBel1.scaffold_119809.1-330533     14648 1054 +    330533 I
e galGal4.chr2                     136949488 65088 + 148809762 I

a score=645330.000000
s mm10.chr15                        56689959 86 + 104043685 A-AATCTTCAGAATTGGGAGTATT-G-ATGCAGGCAAGAGACATCAG-CAAAGATAATGGCCACTTTCATCTTCTT-------------A--ATAAAAGG----TATTC
s rn5.chr7                          97076994 81 + 143501887 ACGATCTTTAGAACTGGGAGTGTT-G-ATGCAGGCACGTGACAGCAG-CAATGATGATGGTCACTTTTAC-------------------A--ATAAAAGA----TCTCC
i rn5.chr7                         C 0 C 0
s hetGla2.JH602048                   9045913 86 -  42145720 AGAATAATCTAAGTTGGGAATATG-A-ATCTAGGCA-GCAACACTGG-GCAGGTGGATGGAAACCTACTTCTGTCT-------------A--ATAAGACA----GTTAC
i hetGla2.JH602048                 C 0 C 0
s cavPor3.scaffold_95                5255091 86 -   5884597 AGAATAACCTGAATTGGGAATATGAA-ATCTAGGCA-GTGACAGTGG-GCAGGTGGA-GGAACCCTATTGCTGTGC-------------A--ATGAGACA----TTCAC
i cavPor3.scaffold_95              C 0 C 0
s speTri2.JH393280                  21197649 87 -  46620681 AGAACAATTAGAATTGGGACTATT-A-ATATATTCAGGTGACACCAG-CAAAGACAATGGAAATCAGCTTCTTGGA-------------A--ATAAATCA----TAATC
i speTri2.JH393280                 C 0 C 0
s ochPri2.scaffold_3008                36321 83 +    168654 AGAAGA----GAACTGACAATATT-A-ATGCAAACCGGCCATGCTCT-CAAGGATTGTAGGTACTGGATTGCATCT-------------G--ACAAGACA----CTCCA
i ochPri2.scaffold_3008            C 0 C 0
s hg19.chr8                        122648113 83 + 146364022 ATGATAATTAGAATTGGGAATATT-T-ATCTAGGCTGGTGACACTAG-CAAGGATAACAGAAATCTGCTTC----T-------------A--AGCAGACA----TACTC
i hg19.chr8                        C 0 I 3
s panTro4.chr8                     120285135 83 + 143986469 ATGATAATTAGAATTGGGAATATT-T-ATCTAGGTTGGTGACACTAG-CAAGGATAACAGAAATCTGCTTC----T-------------A--AGCAGACA----TACTC
i panTro4.chr8                     C 0 I 3
s ponAbe2.chr8                     129323153 83 + 153482349 ATGATAATTAGAATTCGGACTATT-T-ATCTAGGCTGGTGACACTAG-CAAGGATAATAGAAATCTGCTTC----T-------------A--AGCAGACA----TACTC
i ponAbe2.chr8                     C 0 I 3
s nomLeu2.GL397267                  35740938 83 +  48819562 ATGATAATTAGAATTGGGAATATT-T-ATCTAGGCTGGTGACAATAG-CAAGGATAATAGAAATCTGCTTC----T-------------A--AGCAGACA----TACTC
i nomLeu2.GL397267                 C 0 I 3
s rheMac3.chr8                     126562415 83 + 150158102 ATGATAATTAGAATAGGGAATATT-A-ATCTAGCCTGGTGACACTAG-CAGGGATAATAGAGATCTGCTTC----T-------------A--AGCAGACA----TACTC
i rheMac3.chr8                     C 0 I 3
s papHam1.scaffold1185                 75669 83 +    226188 ATGATAATTAGAATAGGGAATATT-A-ATCTAGCCTGGTGACACTAG-CAGGGATAATAGAGATCTGCTTC----T-------------A--AGCAGACA----TACTC
i papHam1.scaffold1185             C 0 I 3
s calJac3.chr16                     23625827 81 -  96796970 ATAATAATTAGAATTGGAAACATT-A-ATCTAGGCTGGTGACACTAG-CAAGGATCATAGAAATCTGCTTC----T-------------A--AGATGACA----TAC--
i calJac3.chr16                    C 0 C 0
s saiBol1.JH378158                   9047900 79 -  16265076 ATAATAATTAGAATCAGAAACATT-A-ATCTAGGTTGGTGACACTAG-CAAGGATCATAGAAATCGGCTTC----T-------------A--AGATG--A----TAC--
i saiBol1.JH378158                 C 0 C 0
s tarSyr1.scaffold_52304               12141 61 +     14295 ATAATGATCAGAATTGGAGATATT-C-ATCTAAGCTGCTGACATC---CAAGGAGCAGGGAG-------------------------------GCAG------------
i tarSyr1.scaffold_52304           C 0 C 0
s micMur1.scaffold_4913                87599 87 +    135929 AGAATAATTAGAATTGGGAATATT-A-ATCTAGGCTGATGATACTAG-CAAGCAGTATGGAAACCTGCTTCTTTGT-------------A--ATAAGACA----TGTTC
i micMur1.scaffold_4913            C 0 C 0
s otoGar3.GL873523                  39377925 87 -  47749213 AGAATAATTAGAATTGGGAATATT-A-ATCTTGACTGCTGATACTAG-CAAGCAATATGGAAACCTGCTTCTTTGT-------------A--ACAAGATG----TATTC
i otoGar3.GL873523                 C 0 I 324
s susScr3.chr4                      18483641 87 + 143465943 -GAATGAGTAGAATTAGGAATAAT-A-ACTTAGGCAGGTGACATATG-CAAGGTATAAGGAGAC-TGCTTCTTCAT-------------A--ATAAGATACATCCAT--
i susScr3.chr4                     I 1 C 0
s vicPac1.scaffold_13                1515023 79 +   2369290 -GAATGATTAGAATTAGGGGTA-------TTAGACAGGTGACACTAG-CAAGGAATATGGACCCCTCCTTCTTTGT-------------A--ATAAGACA----CAT--
i vicPac1.scaffold_13              I 58 C 0
s bosTau7.chr14                     63540041 84 -  81216349 -GAATGATTAGAGTTAGAAATACT-A-ACTTAGGTAGGTGACACTAG-TAAGACATCTGGAAGTATATTTCTCTGT-------------A--ACAAGACA----TAT--
i bosTau7.chr14                    I 1 C 0
s felCat5.chrF2                     64499644 82 +  82763536 -----GATCAGAATTAAGAATATT-A-ACTTAGGCAGGTGACACTGG-CATGGAGCACGGAAACCCACATCTTTAT-------------ACTACAAGACA----TTC--
i felCat5.chrF2                    I 1 C 0
s canFam3.chr13                     20334843 82 +  63241923 -GAATGATTAGAATTAAGAATATT-A-ACTT----AGGTGACACTAG-CAAGGATCCTGGAAACCTGCCTCTTGGT-------------GATATAAGACA----TAC--
i canFam3.chr13                    I 1 C 0
s ailMel1.GL193711.1                  153665 87 -    529242 -GAGTGATCAGAATTAAGAATATT-A-ACTTAGGCAGGTGACACTAGCCAAGGAGCATGGAAACCTGCTTCTTTGT-------------AATATAAGACA----CAC--
i ailMel1.GL193711.1               I 1 C 0
s triMan1.JH594628                   9781121 81 +  24477914 AGAATGATTAAAATTGGGAATATT-A-ACTTAGGCAGGTAGTGT-----AAGGAGTATGGAAACCTGCTGCTTTGT-------------A--ATAAGACA----TTT--
i triMan1.JH594628                 C 0 C 0
s dasNov3.JH579962                   3294254 90 +   3334091 AG---TATTAGAATTGAGAATATT-A-ATATAAGCAGATCACACTAC-AAAGGAGTATGGAAAGCTGCTTCTTTGC-----AAAAAAAAA--AAAAGGCA----TTT--
i dasNov3.JH579962                 C 0 C 0
s choHof1.scaffold_1338                22367 99 +     46317 AGAATAATTACAATTGGGAATATT-AGGTATAGGCAGATGAAACTAG-AAAAGAGTTTGGAAACCTGATTCTTCataaaaaaaaaaaaaa--aaaaaGCA----TTT--
i choHof1.scaffold_1338            C 0 C 0
e sorAra1.scaffold_245118              29209 7774 +     38740 I
e echTel1.scaffold_246123               4312 4388 -     12816 I
e oryCun2.chr3                     137513695 1376 + 155691105 I
e myoLuc2.GL429784                   8889536 2040 +  14577598 I
e gorGor3.chr8                     121284328 8675 + 145327772 T
e loxAfr3.scaffold_8                67679239 3044 +  85640724 I
e equCab2.chr9                      64363182 1228 +  83561422 I
e pteVam1.scaffold_9062                51215 1943 +     66173 I
e oviAri1.chr9                      68467306 2667 - 100831284 I
e melGal1.chr3                      88078472 9551 + 100405168 I
e sarHar1.chr2_GL841388_random        481984 12896 +   1237177 I
e melUnd1.JH556481                    782640 58368 +   3508697 I
e turTru2.JH479543                     20044 2626 -    135452 I
e monDom5.chr3                     395438024 14746 + 527952102 I
e proCap1.scaffold_5125                48935 1945 +     62060 I
e chrPic1.JH584538                    404458 7740 +   8176890 I
e tupBel1.scaffold_119809.1-330533     14648 1054 +    330533 I
e galGal4.chr2                     136949488 65088 + 148809762 I

a score=247463.000000
s mm10.chr15                        56690045 37 + 104043685 ACA--TGGGGT---AAGTTTCTGCCAGCCTCTCATGAACAAA
s rn5.chr7                          97077075 37 + 143501887 ACA--CGGGGT---AACTTTCTGCCAGCTGGTCGTGAACAAA
i rn5.chr7                         C 0 C 0
s hetGla2.JH602048                   9045999 23 -  42145720 A-------------------CTCCTCAGTAATAATGGATCAT
i hetGla2.JH602048                 C 0 C 0
s cavPor3.scaffold_95                5255177 33 -   5884597 ATC--CAGGGT---G----TCTTCTCTCTAATAGCAAATCGT
i cavPor3.scaffold_95              C 0 C 0
s speTri2.JH393280                  21197736 35 -  46620681 TCA--T--GGT---GGCTATCTGCCTGTGAATGGTGGATTAG
i speTri2.JH393280                 C 0 C 0
s ochPri2.scaffold_3008                36404 35 +    168654 A-------GGTTACAGCTATCTGCCCAGTAATGATGAACTAG
i ochPri2.scaffold_3008            C 0 C 0
s hg19.chr8                        122648199 35 + 146364022 TCA--GGTGGT---AGCTATCTGCTGGCT--GAGTGGATTAG
i hg19.chr8                        I 3 C 0
s panTro4.chr8                     120285221 37 + 143986469 TCA--GGTGGT---AGCTATCTGCTGGCTAAGAGTGGATTAG
i panTro4.chr8                     I 3 C 0
s ponAbe2.chr8                     129323239 37 + 153482349 TCA--GGTGGT---AGCTATCTGCTGGCTAAGAGTGGATTAG
i ponAbe2.chr8                     I 3 C 0
s nomLeu2.GL397267                  35741024 37 +  48819562 TCA--GGTGGT---AGCTATCTGCTGGCTAACAGTGGATTAG
i nomLeu2.GL397267                 I 3 C 0
s rheMac3.chr8                     126562501 37 + 150158102 TCA--GGTGGT---AGCTATCTGCTGGCTAAGAGCGGATTAG
i rheMac3.chr8                     I 3 C 0
s papHam1.scaffold1185                 75755 37 +    226188 TCA--GGTGGT---AGCTATCTGCTGGCTAAGAGCGGATTAG
i papHam1.scaffold1185             I 3 C 0
s calJac3.chr16                     23625908 37 -  96796970 TCA--GGTGGT---AGCTAACTGCTGGCTAAGAGTGGATTAG
i calJac3.chr16                    C 0 C 0
s saiBol1.JH378158                   9047979 37 -  16265076 TCA--GGTGGT---ACCTATCTGCTGGTTAAGAGTGGATTAG
i saiBol1.JH378158                 C 0 C 0
s tarSyr1.scaffold_52304               12202 37 +     14295 TTA--GGTGGT---AGCCATCTGCCAGCTAAGAGTGGATCAG
i tarSyr1.scaffold_52304           C 0 C 0
s micMur1.scaffold_4913                87686 35 +    135929 --A--GGTGGT---AACCTTCTGCTGGCTGATAGTGGATAAG
i micMur1.scaffold_4913            C 0 C 0
s susScr3.chr4                      18483728 37 + 143465943 TCT--ACTTGT---GGCTATTTGCCTGCTAACAGTGGATTAG
i susScr3.chr4                     C 0 C 0
s vicPac1.scaffold_13                1515102 37 +   2369290 TCT--GTTGGT---GACCATTTGCCTGCTAATGGTGGATTAG
i vicPac1.scaffold_13              C 0 C 0
s bosTau7.chr14                     63540125 37 -  81216349 TCT--GCTTTT---GGCCATTTGACTGCAAATGGTGGATTAG
i bosTau7.chr14                    C 0 C 0
s felCat5.chrF2                     64499726 37 +  82763536 TTT--GCTTGT---AGACATTTGCCTGCTAACAGTGGATTAG
i felCat5.chrF2                    C 0 C 0
s canFam3.chr13                     20334925 37 +  63241923 TCT--GCTTGT---AGGCATTTGCTTGCTAAGAATAAGTTAC
i canFam3.chr13                    C 0 C 0
s ailMel1.GL193711.1                  153752 39 -    529242 ACTAGGCTTGT---AGCCATTTGCCTGCTAAGGGTGGATTAG
i ailMel1.GL193711.1               C 0 C 0
s triMan1.JH594628                   9781202 26 +  24477914 TCA--GGTGCT---AGccatctgctgcg-----------gaa
i triMan1.JH594628                 C 0 I 136
s dasNov3.JH579962                   3294344 37 +   3334091 TCA--TATGGT---AGTTATCTGCCTGTTAACAGTGGATTAA
i dasNov3.JH579962                 C 0 I 1
s choHof1.scaffold_1338                22466 24 +     46317 TCA--CGTGGT---AGCCTTCAGCCACT-------------A
i choHof1.scaffold_1338            C 0 I 1
e otoGar3.GL873523                  39378012 324 -  47749213 I
e sorAra1.scaffold_245118              29209 7774 +     38740 I
e echTel1.scaffold_246123               4312 4388 -     12816 I
e oryCun2.chr3                     137513695 1376 + 155691105 I
e myoLuc2.GL429784                   8889536 2040 +  14577598 I
e gorGor3.chr8                     121284328 8675 + 145327772 T
e loxAfr3.scaffold_8                67679239 3044 +  85640724 I
e equCab2.chr9                      64363182 1228 +  83561422 I
e pteVam1.scaffold_9062                51215 1943 +     66173 I
e oviAri1.chr9                      68467306 2667 - 100831284 I
e melGal1.chr3                      88078472 9551 + 100405168 I
e sarHar1.chr2_GL841388_random        481984 12896 +   1237177 I
e melUnd1.JH556481                    782640 58368 +   3508697 I
e turTru2.JH479543                     20044 2626 -    135452 I
e monDom5.chr3                     395438024 14746 + 527952102 I
e proCap1.scaffold_5125                48935 1945 +     62060 I
e chrPic1.JH584538                    404458 7740 +   8176890 I
e tupBel1.scaffold_119809.1-330533     14648 1054 +    330533 I
e galGal4.chr2                     136949488 65088 + 148809762 I

a score=72856.000000
s mm10.chr15                        56690082 4 + 104043685 GAAC
s rn5.chr7                          97077112 4 + 143501887 GTGC
i rn5.chr7                         C 0 C 0
s hetGla2.JH602048                   9046022 4 -  42145720 CAAG
i hetGla2.JH602048                 C 0 C 0
s cavPor3.scaffold_95                5255210 4 -   5884597 GAAA
i cavPor3.scaffold_95              C 0 C 0
s speTri2.JH393280                  21197771 4 -  46620681 GAAG
i speTri2.JH393280                 C 0 C 0
s ochPri2.scaffold_3008                36439 4 +    168654 GAAG
i ochPri2.scaffold_3008            C 0 C 0
s hg19.chr8                        122648234 4 + 146364022 GAAG
i hg19.chr8                        C 0 C 0
s panTro4.chr8                     120285258 4 + 143986469 GAAG
i panTro4.chr8                     C 0 C 0
s ponAbe2.chr8                     129323276 4 + 153482349 GAAG
i ponAbe2.chr8                     C 0 C 0
s nomLeu2.GL397267                  35741061 4 +  48819562 GAAG
i nomLeu2.GL397267                 C 0 C 0
s rheMac3.chr8                     126562538 4 + 150158102 GAAG
i rheMac3.chr8                     C 0 C 0
s papHam1.scaffold1185                 75792 4 +    226188 GAAG
i papHam1.scaffold1185             C 0 C 0
s calJac3.chr16                     23625945 4 -  96796970 GAAG
i calJac3.chr16                    C 0 C 0
s saiBol1.JH378158                   9048016 4 -  16265076 GAAG
i saiBol1.JH378158                 C 0 C 0
s tarSyr1.scaffold_52304               12239 4 +     14295 GAAG
i tarSyr1.scaffold_52304           C 0 C 0
s micMur1.scaffold_4913                87721 4 +    135929 GAAG
i micMur1.scaffold_4913            C 0 C 0
s susScr3.chr4                      18483765 4 + 143465943 AAAG
i susScr3.chr4                     C 0 C 0
s vicPac1.scaffold_13                1515139 4 +   2369290 GAAG
i vicPac1.scaffold_13              C 0 C 0
s bosTau7.chr14                     63540162 4 -  81216349 AAAG
i bosTau7.chr14                    C 0 C 0
s felCat5.chrF2                     64499763 4 +  82763536 GAAA
i felCat5.chrF2                    C 0 C 0
s canFam3.chr13                     20334962 4 +  63241923 AAAG
i canFam3.chr13                    C 0 C 0
s ailMel1.GL193711.1                  153791 4 -    529242 GAAG
i ailMel1.GL193711.1               C 0 C 0
s triMan1.JH594628                   9781364 4 +  24477914 GAAC
i triMan1.JH594628                 I 136 C 0
s dasNov3.JH579962                   3294382 4 +   3334091 GAAG
i dasNov3.JH579962                 I 1 C 0
s choHof1.scaffold_1338                22491 4 +     46317 GAAG
i choHof1.scaffold_1338            I 1 C 0
e otoGar3.GL873523                  39378012 324 -  47749213 I
e sorAra1.scaffold_245118              29209 7774 +     38740 I
e echTel1.scaffold_246123               4312 4388 -     12816 I
e oryCun2.chr3                     137513695 1376 + 155691105 I
e myoLuc2.GL429784                   8889536 2040 +  14577598 I
e gorGor3.chr8                     121284328 8675 + 145327772 T
e loxAfr3.scaffold_8                67679239 3044 +  85640724 I
e equCab2.chr9                      64363182 1228 +  83561422 I
e pteVam1.scaffold_9062                51215 1943 +     66173 I
e oviAri1.chr9                      68467306 2667 - 100831284 I
e melGal1.chr3                      88078472 9551 + 100405168 I
e sarHar1.chr2_GL841388_random        481984 12896 +   1237177 I
e melUnd1.JH556481                    782640 58368 +   3508697 I
e turTru2.JH479543                     20044 2626 -    135452 I
e monDom5.chr3                     395438024 14746 + 527952102 I
e proCap1.scaffold_5125                48935 1945 +     62060 I
e chrPic1.JH584538                    404458 7740 +   8176890 I
e tupBel1.scaffold_119809.1-330533     14648 1054 +    330533 I
e galGal4.chr2                     136949488 65088 + 148809762 I

a score=-1463.000000
s mm10.chr15                        56690086 3 + 104043685 AGA
s rn5.chr7                          97077116 3 + 143501887 GGA
i rn5.chr7                         C 0 C 0
s hetGla2.JH602048                   9046026 3 -  42145720 GTA
i hetGla2.JH602048                 C 0 C 0
s cavPor3.scaffold_95                5255214 3 -   5884597 ATT
i cavPor3.scaffold_95              C 0 C 0
s speTri2.JH393280                  21197775 3 -  46620681 GCA
i speTri2.JH393280                 C 0 C 0
s ochPri2.scaffold_3008                36443 3 +    168654 GCA
i ochPri2.scaffold_3008            C 0 C 0
s hg19.chr8                        122648238 3 + 146364022 GTA
i hg19.chr8                        C 0 C 0
s panTro4.chr8                     120285262 3 + 143986469 GTA
i panTro4.chr8                     C 0 C 0
s ponAbe2.chr8                     129323280 3 + 153482349 GTA
i ponAbe2.chr8                     C 0 C 0
s nomLeu2.GL397267                  35741065 3 +  48819562 GTA
i nomLeu2.GL397267                 C 0 C 0
s rheMac3.chr8                     126562542 3 + 150158102 GTA
i rheMac3.chr8                     C 0 C 0
s papHam1.scaffold1185                 75796 3 +    226188 GTA
i papHam1.scaffold1185             C 0 C 0
s calJac3.chr16                     23625949 3 -  96796970 GTA
i calJac3.chr16                    C 0 C 0
s saiBol1.JH378158                   9048020 3 -  16265076 GTA
i saiBol1.JH378158                 C 0 C 0
s tarSyr1.scaffold_52304               12243 3 +     14295 TCA
i tarSyr1.scaffold_52304           C 0 C 0
s micMur1.scaffold_4913                87725 3 +    135929 ATA
i micMur1.scaffold_4913            C 0 C 0
s otoGar3.GL873523                  39378336 3 -  47749213 aga
i otoGar3.GL873523                 I 324 C 0
s susScr3.chr4                      18483769 2 + 143465943 -CA
i susScr3.chr4                     C 0 C 0
s vicPac1.scaffold_13                1515143 2 +   2369290 -TA
i vicPac1.scaffold_13              C 0 C 0
s bosTau7.chr14                     63540166 2 -  81216349 -GA
i bosTau7.chr14                    C 0 C 0
s felCat5.chrF2                     64499767 2 +  82763536 -CC
i felCat5.chrF2                    C 0 I 4
s canFam3.chr13                     20334966 2 +  63241923 -GT
i canFam3.chr13                    C 0 I 1
s ailMel1.GL193711.1                  153795 2 -    529242 -GC
i ailMel1.GL193711.1               C 0 I 1
s triMan1.JH594628                   9781368 3 +  24477914 GTA
i triMan1.JH594628                 C 0 C 0
s dasNov3.JH579962                   3294386 3 +   3334091 CTG
i dasNov3.JH579962                 C 0 C 0
s choHof1.scaffold_1338                22495 3 +     46317 CTG
i choHof1.scaffold_1338            C 0 C 0
e sorAra1.scaffold_245118              29209 7774 +     38740 I
e echTel1.scaffold_246123               4312 4388 -     12816 I
e oryCun2.chr3                     137513695 1376 + 155691105 I
e myoLuc2.GL429784                   8889536 2040 +  14577598 I
e gorGor3.chr8                     121284328 8675 + 145327772 T
e loxAfr3.scaffold_8                67679239 3044 +  85640724 I
e equCab2.chr9                      64363182 1228 +  83561422 I
e pteVam1.scaffold_9062                51215 1943 +     66173 I
e oviAri1.chr9                      68467306 2667 - 100831284 I
e melGal1.chr3                      88078472 9551 + 100405168 I
e sarHar1.chr2_GL841388_random        481984 12896 +   1237177 I
e melUnd1.JH556481                    782640 58368 +   3508697 I
e turTru2.JH479543                     20044 2626 -    135452 I
e monDom5.chr3                     395438024 14746 + 527952102 I
e proCap1.scaffold_5125                48935 1945 +     62060 I
e chrPic1.JH584538                    404458 7740 +   8176890 I
e tupBel1.scaffold_119809.1-330533     14648 1054 +    330533 I
e galGal4.chr2                     136949488 65088 + 148809762 I

a score=427962.000000
s mm10.chr15                        56690089 31 + 104043685 CAATGACTGAAAAGTGGA-AATGTAGTGGTTC
s rn5.chr7                          97077119 31 + 143501887 TAGTGAGTGAAAAGTGAA-AATGTAGTGGTTG
i rn5.chr7                         C 0 C 0
s hetGla2.JH602048                   9046029 31 -  42145720 TAGTGACTGAAAGGTTAA-AAAGCAGTAGCTC
i hetGla2.JH602048                 C 0 C 0
s cavPor3.scaffold_95                5255217 31 -   5884597 CAGTGACTGAAAGGTTAA-AAAGCAGTTGCTC
i cavPor3.scaffold_95              C 0 C 0
s speTri2.JH393280                  21197778 31 -  46620681 TAGTGAGTCAAAGATTTA-AAAGTagtatttc
i speTri2.JH393280                 C 0 C 0
s ochPri2.scaffold_3008                36446 30 +    168654 TTTTGAGCGAAAAGTTGA-AAT-Taatgattc
i ochPri2.scaffold_3008            C 0 C 0
s hg19.chr8                        122648241 31 + 146364022 TGGTGAACAAAAGGTTAA-AAAGTagtggttc
i hg19.chr8                        C 0 C 0
s panTro4.chr8                     120285265 31 + 143986469 TGGTGAACAAAAGGTTAA-AAAGTagtagttc
i panTro4.chr8                     C 0 C 0
s ponAbe2.chr8                     129323283 31 + 153482349 TGGTGAACAAAAGGTTAA-AAAGTagtggttc
i ponAbe2.chr8                     C 0 C 0
s nomLeu2.GL397267                  35741068 31 +  48819562 TGGTGAACAAAAGGTTAA-AAAGTagtggttc
i nomLeu2.GL397267                 C 0 C 0
s rheMac3.chr8                     126562545 31 + 150158102 TGGTGAATAAAAGGTTAA-AAAGTagtggttc
i rheMac3.chr8                     C 0 C 0
s papHam1.scaffold1185                 75799 31 +    226188 TGGTGAATAAAAGGTTAA-AAAGTagtggttc
i papHam1.scaffold1185             C 0 C 0
s calJac3.chr16                     23625952 31 -  96796970 TGGTGAGCAAAGGGTTAA-AAAGTagtggttc
i calJac3.chr16                    C 0 C 0
s saiBol1.JH378158                   9048023 30 -  16265076 TGGTGAGCAAA-GGTTAA-AAAGTagtggttc
i saiBol1.JH378158                 C 0 C 0
s tarSyr1.scaffold_52304               12246 31 +     14295 TGGTGAGCAAAAGGTTAA-ACAGCAGTGGTTT
i tarSyr1.scaffold_52304           C 0 C 0
s micMur1.scaffold_4913                87728 30 +    135929 TGGTGAGCAAAAGGTTAA-AAAGTAAGGTTT-
i micMur1.scaffold_4913            C 0 I 303
s otoGar3.GL873523                  39378339 31 -  47749213 ccctgcctcaaaaataaaCAAGGCAGggttt-
i otoGar3.GL873523                 C 0 C 0
s susScr3.chr4                      18483771 31 + 143465943 TGGTGAACAAAGGGTCCA-AAAGCGTTGGTTC
i susScr3.chr4                     C 0 C 0
s vicPac1.scaffold_13                1515145 30 +   2369290 TGGTGAA-AAGAGGTTAA-AAAGCTgtggttc
i vicPac1.scaffold_13              C 0 C 0
s bosTau7.chr14                     63540168 31 -  81216349 TGGTCAACAAAAGGCTAA-AAAGcagtggttc
i bosTau7.chr14                    C 0 C 0
s felCat5.chrF2                     64499773 30 +  82763536 TGGTGAGCAAAGG-TTAA-AAAGTCgtggttc
i felCat5.chrF2                    I 4 C 0
s canFam3.chr13                     20334969 29 +  63241923 TGATGAGCAAAGG--TAG-AAAGAagaggttc
i canFam3.chr13                    I 1 C 0
s ailMel1.GL193711.1                  153798 29 -    529242 TGGTGAGCAAAGG--TAA-GAAGTAGGGGTTC
i ailMel1.GL193711.1               I 1 C 0
s equCab2.chr9                      64364410 28 +  83561422 cattaattaaaaa---aa-aaaGTagtggttc
i equCab2.chr9                     I 1228 C 0
s triMan1.JH594628                   9781371 29 +  24477914 TGATGAGCAAAAGGTT---GAAGTagtggttt
i triMan1.JH594628                 C 0 C 0
s dasNov3.JH579962                   3294389 29 +   3334091 TGTTGATCAAATGGTT---AAAGCTGTGGTTT
i dasNov3.JH579962                 C 0 C 0
s choHof1.scaffold_1338                22498 29 +     46317 TGTTGATCAAATGGTT---AAAATagtggttc
i choHof1.scaffold_1338            C 0 C 0
e sorAra1.scaffold_245118              29209 7774 +     38740 I
e echTel1.scaffold_246123               4312 4388 -     12816 I
e oryCun2.chr3                     137513695 1376 + 155691105 I
e myoLuc2.GL429784                   8889536 2040 +  14577598 I
e gorGor3.chr8                     121284328 8675 + 145327772 T
e loxAfr3.scaffold_8                67679239 3044 +  85640724 I
e pteVam1.scaffold_9062                51215 1943 +     66173 I
e oviAri1.chr9                      68467306 2667 - 100831284 I
e melGal1.chr3                      88078472 9551 + 100405168 I
e sarHar1.chr2_GL841388_random        481984 12896 +   1237177 I
e melUnd1.JH556481                    782640 58368 +   3508697 I
e turTru2.JH479543                     20044 2626 -    135452 I
e monDom5.chr3                     395438024 14746 + 527952102 I
e proCap1.scaffold_5125                48935 1945 +     62060 I
e chrPic1.JH584538                    404458 7740 +   8176890 I
e tupBel1.scaffold_119809.1-330533     14648 1054 +    330533 I
e galGal4.chr2                     136949488 65088 + 148809762 I

a score=221620.000000
s mm10.chr15                        56690120 20 + 104043685 CCAATTATTGCT-----GAAGATTC
s rn5.chr7                          97077150 19 + 143501887 CCAATTATTGCT-----GTAGAT-A
i rn5.chr7                         C 0 C 0
s hetGla2.JH602048                   9046060 19 -  42145720 CTAAATTTGGCT-----GTAGAC-C
i hetGla2.JH602048                 C 0 C 0
s cavPor3.scaffold_95                5255248 23 -   5884597 CCAAATTTATCCCAAAGGTATA--C
i cavPor3.scaffold_95              C 0 C 0
s speTri2.JH393280                  21197809 20 -  46620681 tcaaattgtgct-----gaacatcc
i speTri2.JH393280                 C 0 C 0
s ochPri2.scaffold_3008                36476 20 +    168654 caaaactttgtt-----gtatatac
i ochPri2.scaffold_3008            C 0 C 0
s hg19.chr8                        122648272 20 + 146364022 ccaaattttgct-----atatatgc
i hg19.chr8                        C 0 C 0
s panTro4.chr8                     120285296 20 + 143986469 ccaaattttgct-----atatatgc
i panTro4.chr8                     C 0 C 0
s ponAbe2.chr8                     129323314 20 + 153482349 ccagattttgct-----atatatgc
i ponAbe2.chr8                     C 0 C 0
s nomLeu2.GL397267                  35741099 20 +  48819562 ccaaattttgct-----gtatatgc
i nomLeu2.GL397267                 C 0 C 0
s rheMac3.chr8                     126562576 20 + 150158102 ccaaattttgct-----atatatgc
i rheMac3.chr8                     C 0 C 0
s papHam1.scaffold1185                 75830 20 +    226188 ccaaattttgct-----atatatgc
i papHam1.scaffold1185             C 0 C 0
s calJac3.chr16                     23625983 20 -  96796970 ccaaattttgct-----atatatcc
i calJac3.chr16                    C 0 C 0
s saiBol1.JH378158                   9048053 20 -  16265076 ctaaattttgct-----atatatcc
i saiBol1.JH378158                 C 0 C 0
s tarSyr1.scaffold_52304               12277 20 +     14295 CCAAATGTAGCC-----GTATATCC
i tarSyr1.scaffold_52304           C 0 C 0
s otoGar3.GL873523                  39378370 20 -  47749213 ccaaattttgcc-----ttataccc
i otoGar3.GL873523                 C 0 I 1
s susScr3.chr4                      18483802 20 + 143465943 ACAAAAACTGAt-----gtacatcc
i susScr3.chr4                     C 0 C 0
s vicPac1.scaffold_13                1515175 20 +   2369290 ccaaatgtcgat-----gaacatcc
i vicPac1.scaffold_13              C 0 C 0
s bosTau7.chr14                     63540199 20 -  81216349 ccaaatattgat-----gtatatcc
i bosTau7.chr14                    C 0 C 0
s felCat5.chrF2                     64499803 20 +  82763536 ccaaattttgat-----gtacgtcc
i felCat5.chrF2                    C 0 C 0
s canFam3.chr13                     20334998 20 +  63241923 ccaaattttgat-----gtacatcc
i canFam3.chr13                    C 0 C 0
s ailMel1.GL193711.1                  153827 20 -    529242 CCAAATTTTGAC-----ATACAGCC
i ailMel1.GL193711.1               C 0 C 0
s equCab2.chr9                      64364438 20 +  83561422 ccaaattttgct-----gtacattt
i equCab2.chr9                     C 0 C 0
s triMan1.JH594628                   9781400 20 +  24477914 gcaaactttact-----ggacattg
i triMan1.JH594628                 C 0 C 0
s dasNov3.JH579962                   3294418 11 +   3334091 CCAAactttgc--------------
i dasNov3.JH579962                 C 0 C 0
s choHof1.scaffold_1338                22527 20 +     46317 ccaagatttgct-----gtacaaca
i choHof1.scaffold_1338            C 0 C 0
e sorAra1.scaffold_245118              29209 7774 +     38740 I
e micMur1.scaffold_4913                87758 303 +    135929 I
e echTel1.scaffold_246123               4312 4388 -     12816 I
e oryCun2.chr3                     137513695 1376 + 155691105 I
e myoLuc2.GL429784                   8889536 2040 +  14577598 I
e gorGor3.chr8                     121284328 8675 + 145327772 T
e loxAfr3.scaffold_8                67679239 3044 +  85640724 I
e pteVam1.scaffold_9062                51215 1943 +     66173 I
e oviAri1.chr9                      68467306 2667 - 100831284 I
e melGal1.chr3                      88078472 9551 + 100405168 I
e sarHar1.chr2_GL841388_random        481984 12896 +   1237177 I
e melUnd1.JH556481                    782640 58368 +   3508697 I
e turTru2.JH479543                     20044 2626 -    135452 I
e monDom5.chr3                     395438024 14746 + 527952102 I
e proCap1.scaffold_5125                48935 1945 +     62060 I
e chrPic1.JH584538                    404458 7740 +   8176890 I
e tupBel1.scaffold_119809.1-330533     14648 1054 +    330533 I
e galGal4.chr2                     136949488 65088 + 148809762 I

a score=48987.000000
s mm10.chr15                        56690140  9 + 104043685 AATTG-ACTT
s rn5.chr7                          97077169  9 + 143501887 AATTG-ACCT
i rn5.chr7                         C 0 C 0
s hetGla2.JH602048                   9046079  9 -  42145720 ACATT-ACCT
i hetGla2.JH602048                 C 0 C 0
s cavPor3.scaffold_95                5255271  9 -   5884597 ATACC-ACCC
i cavPor3.scaffold_95              C 0 C 0
s speTri2.JH393280                  21197829  9 -  46620681 aaatt-acct
i speTri2.JH393280                 C 0 C 0
s ochPri2.scaffold_3008                36496  8 +    168654 cagtt-act-
i ochPri2.scaffold_3008            C 0 C 0
s hg19.chr8                        122648292  9 + 146364022 aaatt-acct
i hg19.chr8                        C 0 I 2
s panTro4.chr8                     120285316  9 + 143986469 aaatt-acct
i panTro4.chr8                     C 0 I 2
s ponAbe2.chr8                     129323334  9 + 153482349 aaatt-accc
i ponAbe2.chr8                     C 0 I 2
s nomLeu2.GL397267                  35741119  9 +  48819562 aaatt-accc
i nomLeu2.GL397267                 C 0 I 2
s rheMac3.chr8                     126562596  9 + 150158102 agatt-accc
i rheMac3.chr8                     C 0 I 2
s papHam1.scaffold1185                 75850  9 +    226188 agatt-accc
i papHam1.scaffold1185             C 0 I 2
s calJac3.chr16                     23626003  9 -  96796970 aaatt-accc
i calJac3.chr16                    C 0 I 2
s saiBol1.JH378158                   9048073  9 -  16265076 aaact-accc
i saiBol1.JH378158                 C 0 I 2
s tarSyr1.scaffold_52304               12297  9 +     14295 AAGTT-ACCT
i tarSyr1.scaffold_52304           C 0 I 1183
s micMur1.scaffold_4913                88061  8 +    135929 -aatt-acct
i micMur1.scaffold_4913            I 303 I 2
s otoGar3.GL873523                  39378391  8 -  47749213 -aatt-actt
i otoGar3.GL873523                 I 1 I 2
s susScr3.chr4                      18483822  7 + 143465943 aaaca-cc--
i susScr3.chr4                     C 0 I 2
s vicPac1.scaffold_13                1515195  7 +   2369290 aaatc-ac--
i vicPac1.scaffold_13              C 0 I 3
s bosTau7.chr14                     63540219  7 -  81216349 aattc-cc--
i bosTau7.chr14                    C 0 I 2
s felCat5.chrF2                     64499823 10 +  82763536 aaattaactc
i felCat5.chrF2                    C 0 I 2
s canFam3.chr13                     20335018  8 +  63241923 acatt-act-
i canFam3.chr13                    C 0 I 2
s ailMel1.GL193711.1                  153847  9 -    529242 ACATT-cctg
i ailMel1.GL193711.1               C 0 I 2
s equCab2.chr9                      64364458  8 +  83561422 caatt-acc-
i equCab2.chr9                     C 0 I 2
s triMan1.JH594628                   9781420  9 +  24477914 gaatt-atct
i triMan1.JH594628                 C 0 C 0
s dasNov3.JH579962                   3294429  8 +   3334091 -aatt-acct
i dasNov3.JH579962                 C 0 C 0
s choHof1.scaffold_1338                22547  9 +     46317 tcatt-acct
i choHof1.scaffold_1338            C 0 C 0
e sorAra1.scaffold_245118              29209 7774 +     38740 I
e echTel1.scaffold_246123               4312 4388 -     12816 I
e oryCun2.chr3                     137513695 1376 + 155691105 I
e myoLuc2.GL429784                   8889536 2040 +  14577598 I
e gorGor3.chr8                     121284328 8675 + 145327772 T
e loxAfr3.scaffold_8                67679239 3044 +  85640724 I
e pteVam1.scaffold_9062                51215 1943 +     66173 I
e oviAri1.chr9                      68467306 2667 - 100831284 I
e melGal1.chr3                      88078472 9551 + 100405168 I
e sarHar1.chr2_GL841388_random        481984 12896 +   1237177 I
e melUnd1.JH556481                    782640 58368 +   3508697 I
e turTru2.JH479543                     20044 2626 -    135452 I
e monDom5.chr3                     395438024 14746 + 527952102 I
e proCap1.scaffold_5125                48935 1945 +     62060 I
e chrPic1.JH584538                    404458 7740 +   8176890 I
e tupBel1.scaffold_119809.1-330533     14648 1054 +    330533 I
e galGal4.chr2                     136949488 65088 + 148809762 I

a score=138720.000000
s mm10.chr15                        56690149 20 + 104043685 AAAATCATATGAAATCCACT
s rn5.chr7                          97077178 20 + 143501887 GAGGACACATAAAAGCAACT
i rn5.chr7                         C 0 C 0
s hetGla2.JH602048                   9046088 20 -  42145720 GGTTACCTGTGAAAGTTACT
i hetGla2.JH602048                 C 0 C 0
s cavPor3.scaffold_95                5255280 20 -   5884597 AGTTACCAGCCAAAGTTACT
i cavPor3.scaffold_95              C 0 C 0
s speTri2.JH393280                  21197838 20 -  46620681 gatgacttgggaaagtccct
i speTri2.JH393280                 C 0 C 0
s ochPri2.scaffold_3008                36504 19 +    168654 -attgaatctgaaaaatact
i ochPri2.scaffold_3008            C 0 C 0
s hg19.chr8                        122648303 18 + 146364022 --aaagccataaaatttact
i hg19.chr8                        I 2 C 0
s panTro4.chr8                     120285327 18 + 143986469 --aaagccataaaatttact
i panTro4.chr8                     I 2 C 0
s ponAbe2.chr8                     129323345 18 + 153482349 --aaatccataaaatttact
i ponAbe2.chr8                     I 2 C 0
s nomLeu2.GL397267                  35741130 18 +  48819562 --aaatccataaaatttact
i nomLeu2.GL397267                 I 2 C 0
s rheMac3.chr8                     126562607 18 + 150158102 --aagttcataaaatgtaca
i rheMac3.chr8                     I 2 C 0
s papHam1.scaffold1185                 75861 18 +    226188 --aagttcataaaatttaca
i papHam1.scaffold1185             I 2 C 0
s calJac3.chr16                     23626014 18 -  96796970 --aaatccataaaattatct
i calJac3.chr16                    I 2 C 0
s saiBol1.JH378158                   9048084 18 -  16265076 --gaatccacaaaattatct
i saiBol1.JH378158                 I 2 C 0
s micMur1.scaffold_4913                88071 18 +    135929 --agatctataaaaattact
i micMur1.scaffold_4913            I 2 C 0
s otoGar3.GL873523                  39378401 15 -  47749213 --ggatctgtaaaatg---t
i otoGar3.GL873523                 I 2 C 0
s susScr3.chr4                      18483831 19 + 143465943 -gaaatctgtacaaattact
i susScr3.chr4                     I 2 C 0
s vicPac1.scaffold_13                1515205 19 +   2369290 -agaatctgcaaaaattact
i vicPac1.scaffold_13              I 3 C 0
s bosTau7.chr14                     63540228 19 -  81216349 -ggaatctgtaaaaattaca
i bosTau7.chr14                    I 2 C 0
s felCat5.chrF2                     64499835 19 +  82763536 -gggatctgtaaaaattact
i felCat5.chrF2                    I 2 C 0
s canFam3.chr13                     20335028 19 +  63241923 -ggcatctgtaaaatctact
i canFam3.chr13                    I 2 I 81
s ailMel1.GL193711.1                  153858 19 -    529242 -ggggtctgtaaaaactacc
i ailMel1.GL193711.1               I 2 C 0
s equCab2.chr9                      64364468 19 +  83561422 -gggatctgtaaaaattact
i equCab2.chr9                     I 2 C 0
s triMan1.JH594628                   9781429 20 +  24477914 ggggatctttaaaaattact
i triMan1.JH594628                 C 0 C 0
s dasNov3.JH579962                   3294437 20 +   3334091 aggaatctttaaaaattact
i dasNov3.JH579962                 C 0 C 0
s choHof1.scaffold_1338                22556 20 +     46317 gggactctttaataattacc
i choHof1.scaffold_1338            C 0 C 0
e sorAra1.scaffold_245118              29209 7774 +     38740 I
e echTel1.scaffold_246123               4312 4388 -     12816 I
e oryCun2.chr3                     137513695 1376 + 155691105 I
e myoLuc2.GL429784                   8889536 2040 +  14577598 I
e gorGor3.chr8                     121284328 8675 + 145327772 T
e loxAfr3.scaffold_8                67679239 3044 +  85640724 I
e pteVam1.scaffold_9062                51215 1943 +     66173 I
e tarSyr1.scaffold_52304               12306 1183 +     14295 I
e oviAri1.chr9                      68467306 2667 - 100831284 I
e melGal1.chr3                      88078472 9551 + 100405168 I
e sarHar1.chr2_GL841388_random        481984 12896 +   1237177 I
e melUnd1.JH556481                    782640 58368 +   3508697 I
e turTru2.JH479543                     20044 2626 -    135452 I
e monDom5.chr3                     395438024 14746 + 527952102 I
e proCap1.scaffold_5125                48935 1945 +     62060 I
e chrPic1.JH584538                    404458 7740 +   8176890 I
e tupBel1.scaffold_119809.1-330533     14648 1054 +    330533 I
e galGal4.chr2                     136949488 65088 + 148809762 I

a score=104134.000000
s mm10.chr15                        56690169 54 + 104043685 GGCGTGTTGCTGATCACACCAGCA-------TTCCCTGAT---------------ACAAGCTACAA----CTAGCGT---AGC
s rn5.chr7                          97077198 54 + 143501887 GTCACGTTGCTGATTACAACAGCA-------TTCCCTGAT---------------ACAAGCTGCAA----CCAGAGT---AAC
i rn5.chr7                         C 0 C 0
s hetGla2.JH602048                   9046108 13 -  42145720 Gttaag-------------------------tctcct---------------------------------------------c
i hetGla2.JH602048                 C 0 C 0
s cavPor3.scaffold_95                5255300 13 -   5884597 GTTTAG-------------------------TCTCCT---------------------------------------------C
i cavPor3.scaffold_95              C 0 C 0
s speTri2.JH393280                  21197858 55 -  46620681 gacatg----tggctctaacaaca-------ttctaagtt-aat---------tgaaaggaattaa----ttataat---ctc
i speTri2.JH393280                 C 0 C 0
s ochPri2.scaffold_3008                36523 76 +    168654 gac-tg----tgactcccataacacactgagttcactgac-agtgtgtgtggccaaggcattgcaag-ttttaaaatttcctc
i ochPri2.scaffold_3008            C 0 C 0
s hg19.chr8                        122648321 74 + 146364022 gatctg----tggctccc---acattttgagttcattgat-atgggctgtgcccaggtcatcacaag-ttttaaaatctcctc
i hg19.chr8                        C 0 C 0
s panTro4.chr8                     120285345 74 + 143986469 gatctg----tggctccc---acattttgagttcattgat-atgggctatgcccaggtcatcacaag-ttttaaaatctcctc
i panTro4.chr8                     C 0 C 0
s ponAbe2.chr8                     129323363 75 + 153482349 gatctg----tggctccc---acattttgagttcattgataatgggctgtgcccaggtcatcacaag-ttttaaaatctcctc
i ponAbe2.chr8                     C 0 C 0
s nomLeu2.GL397267                  35741148 74 +  48819562 tatcta----tggatccc---acattttgagttcattgat-atgggctgtgcccaggtcttcacaag-ttttaaaatctcctc
i nomLeu2.GL397267                 C 0 C 0
s rheMac3.chr8                     126562625 74 + 150158102 gatctg----tggctccc---acattttgagttcattgat-atgggctgtgcccaggtcatcacaag-ttttaaaatctcctc
i rheMac3.chr8                     C 0 C 0
s papHam1.scaffold1185                 75879 74 +    226188 gatctg----tggctccc---acattttgagttcattgat-atgggctgtgcccaggtcatcacaag-ttttaaaatctcctc
i papHam1.scaffold1185             C 0 C 0
s calJac3.chr16                     23626032 74 -  96796970 gatctg----tggctccc---acattttgagttcattgct-atgggctgtgcccaggtcatcacagg-ttttaaaatctcctc
i calJac3.chr16                    C 0 C 0
s saiBol1.JH378158                   9048102 74 -  16265076 gatctg----tggctccc---acattttgagttcattgat-atgggctgtgcccaggtcattacagg-ttttaaaatctcctc
i saiBol1.JH378158                 C 0 C 0
s micMur1.scaffold_4913                88089 77 +    135929 gatctg----tggcccctacaacattctgagttaattgat-atgtggtgtgaccagtacattacaag-ttttaaaatctctcc
i micMur1.scaffold_4913            C 0 C 0
s otoGar3.GL873523                  39378416 78 -  47749213 gatgtg----tggctcccacaacattctgagttaactggt-acggggcgtgactagggcatcacaaatttttaaaatctcccc
i otoGar3.GL873523                 C 0 C 0
s susScr3.chr4                      18483850 57 + 143465943 gatgcg----tggttcctacaacgctctgagttatttgcg-atggagtgctacaagagtatc---------------------
i susScr3.chr4                     C 0 I 17
s vicPac1.scaffold_13                1515224 57 +   2369290 gacgtg----tggctcctacaacaccctgagttaattagc-ctagagtgctgcaagggcatc---------------------
i vicPac1.scaffold_13              C 0 I 20
s bosTau7.chr14                     63540247 57 -  81216349 gaagtg----tggctcctgcaacattctgagtgaattggc-atggggtgctacaagcctgtc---------------------
i bosTau7.chr14                    C 0 I 20
s felCat5.chrF2                     64499854 57 +  82763536 gatatg----cggctcctacaacatccagagttaattggt-agggggtgctaacagggcatc---------------------
i felCat5.chrF2                    C 0 I 20
s ailMel1.GL193711.1                  153877 41 -    529242 catgtg----tggctcctccaacattctaagttcattggt-atggg-------------------------------------
i ailMel1.GL193711.1               C 0 C 0
s equCab2.chr9                      64364487 57 +  83561422 gatgtg----tgactcctacaacattgtgagttcattggt-atggagtgctactagggcatc---------------------
i equCab2.chr9                     C 0 I 20
s triMan1.JH594628                   9781449 57 +  24477914 gatttg----tgactccgacatcattctcagttaattggt-atggggttcaaccagggtatc---------------------
i triMan1.JH594628                 C 0 C 0
s dasNov3.JH579962                   3294457 56 +   3334091 gatgtg----tggctaccacagcattctgagttcatctgt-gtggggtacaacc-gggcatc---------------------
i dasNov3.JH579962                 C 0 C 0
s choHof1.scaffold_1338                22576 57 +     46317 catgtg----tggctcccacagcattctgagttaatttgt-gtggggtgcaaccagggcatc---------------------
i choHof1.scaffold_1338            C 0 C 0
e sorAra1.scaffold_245118              29209 7774 +     38740 I
e echTel1.scaffold_246123               4312 4388 -     12816 I
e oryCun2.chr3                     137513695 1376 + 155691105 I
e myoLuc2.GL429784                   8889536 2040 +  14577598 I
e gorGor3.chr8                     121284328 8675 + 145327772 T
e loxAfr3.scaffold_8                67679239 3044 +  85640724 I
e canFam3.chr13                     20335047 81 +  63241923 I
e pteVam1.scaffold_9062                51215 1943 +     66173 I
e tarSyr1.scaffold_52304               12306 1183 +     14295 I
e oviAri1.chr9                      68467306 2667 - 100831284 I
e melGal1.chr3                      88078472 9551 + 100405168 I
e sarHar1.chr2_GL841388_random        481984 12896 +   1237177 I
e melUnd1.JH556481                    782640 58368 +   3508697 I
e turTru2.JH479543                     20044 2626 -    135452 I
e monDom5.chr3                     395438024 14746 + 527952102 I
e proCap1.scaffold_5125                48935 1945 +     62060 I
e chrPic1.JH584538                    404458 7740 +   8176890 I
e tupBel1.scaffold_119809.1-330533     14648 1054 +    330533 I
e galGal4.chr2                     136949488 65088 + 148809762 I

a score=358699.000000
s mm10.chr15                        56690223 59 + 104043685 ACACGTTTTTGAT--------GTGCAACAA-AGCCTGGGCTAGCAGTCACTGAGTTACAGAGTTA---AAG---------
s rn5.chr7                          97077252 59 + 143501887 GCAAGATTTTAAT--------GTGCAACAA-AACCTGGGCTAGCACTCACTGAGTTACAGAGTTG---AAG---------
i rn5.chr7                         C 0 C 0
s hetGla2.JH602048                   9046121 54 -  42145720 aggaaattctagt--------gtgcaccaa-agttTGGTTTAACAA-TACCATGTT----AGTCA---AAG---------
i hetGla2.JH602048                 C 0 I 8
s cavPor3.scaffold_95                5255313 57 -   5884597 AGGAAATTCTAAA--------GTGCAGCAC-AGTTTGGTTCAACAAGCACTGAGTT--AAAGTCA---AAG---------
i cavPor3.scaffold_95              C 0 I 1757
s speTri2.JH393280                  21197913 57 -  46620681 aggagattctaat--------gtgcaataa-agtttgGTTTGGCATTCACTGGGTT--AAAGTCA---AAG---------
i speTri2.JH393280                 C 0 I 7
s ochPri2.scaffold_3008                36599 54 +    168654 tggagattctaatctagtttaatgcaacaa-agcct-----agcaaccactgGCTT--AACA------------------
i ochPri2.scaffold_3008            C 0 I 7
s hg19.chr8                        122648395 52 + 146364022 cagcaattcagct--------atataacaa-agttt-----ggcaaccactAGGTT--AAAGTAA---AAT---------
i hg19.chr8                        C 0 I 12
s panTro4.chr8                     120285419 52 + 143986469 cagcaattcagct--------atataacaa-agttt-----ggcaaccactAGGTT--AAAGTAA---AAT---------
i panTro4.chr8                     C 0 I 12
s ponAbe2.chr8                     129323438 52 + 153482349 cagcaatttagct--------atataacaa-agttt-----ggcaaccactAGGTT--AAAGTAA---AAT---------
i ponAbe2.chr8                     C 0 I 12
s nomLeu2.GL397267                  35741222 52 +  48819562 cagcaattcagct--------atataacaa-agttt-----ggcaaccactAGGTT--AAAGTAA---AAT---------
i nomLeu2.GL397267                 C 0 I 12
s rheMac3.chr8                     126562699 52 + 150158102 cggcaattcaact--------atataacaa-agttt-----ggcaactactAGATT--AAAGTAA---AAT---------
i rheMac3.chr8                     C 0 I 12
s papHam1.scaffold1185                 75953 52 +    226188 cggcaattcaact--------atataacaa-agttt-----ggcaactactAGGTT--AAAGTAA---AAT---------
i papHam1.scaffold1185             C 0 I 12
s calJac3.chr16                     23626106 53 -  96796970 cagcaattgaact--------atataacaa-agttt-----ggc-accactAGGTTAAAAAGTAA---AAT---------
i calJac3.chr16                    C 0 I 12
s saiBol1.JH378158                   9048176 52 -  16265076 cagcaattcaact--------atataacaa-agttt-----ggcaaccacCAGGTT--AAAGTAA---AAT---------
i saiBol1.JH378158                 C 0 I 12
s micMur1.scaffold_4913                88166 52 +    135929 aagtgattcaaat--------gtaaaacaa-tgttt-----ggcaactattgGGTT--AAAGTTA---TAG---------
i micMur1.scaffold_4913            C 0 I 12
s otoGar3.GL873523                  39378494 49 -  47749213 aggtgattgaaag--------gtacagcaa-tgttt-----gacaaccactgGGTT--AAAGTTA---------------
i otoGar3.GL873523                 C 0 I 12
s susScr3.chr4                      18483924 51 + 143465943 aagctattctaat---------tacaacaa-aTTTC-----CACAATTACTGGGAT--GAAGTCT---AAC---------
i susScr3.chr4                     I 17 I 12
s vicPac1.scaffold_13                1515301 53 +   2369290 aactgattccaat---------tgcagcaa-agttt-----ggcaatcactgGGTTAAAAAGTCT---AAG---------
i vicPac1.scaffold_13              I 20 I 12
s bosTau7.chr14                     63540324 51 -  81216349 aagtaactctaat---------tgcaacaa-agttt-----ggtaatcattAGGTT--AAAGTCT---AAG---------
i bosTau7.chr14                    I 20 I 12
s felCat5.chrF2                     64499931 51 +  82763536 aagtgattctaat---------tgcaacga-agttt-----ggccatcactgGGTT--AAAGTCT---AAG---------
i felCat5.chrF2                    I 20 I 12
s canFam3.chr13                     20335128 51 +  63241923 atgcgattctcat---------tgcaacaa-agtgt-----ggcaatcactgGGTT--AAAGTCT---AAG---------
i canFam3.chr13                    I 81 I 12
s ailMel1.GL193711.1                  153918 32 -    529242 -----------------------gcactaacagggc-----atcagtaatt---tt--caaatct---------------
i ailMel1.GL193711.1               C 0 I 9
s equCab2.chr9                      64364564 51 +  83561422 aagccattctaat---------tgcaacaa-agttt-----ggcaatcacCAGGTT--AAAGTGT---AAG---------
i equCab2.chr9                     I 20 I 12
s triMan1.JH594628                   9781533 64 +  24477914 aggtgattctaat--------atgccccga-agttt-----ggaaaccactgGCTT--AAAGTCAAAGAAGATTTTCATG
i triMan1.JH594628                 C 0 C 0
s dasNov3.JH579962                   3294533 58 +   3334091 agatcattctgac--------ata---caa-atttt-----gggaatcagtgAGTT--AAAGACA---AAGACTTTCATG
i dasNov3.JH579962                 C 0 C 0
s choHof1.scaffold_1338                22658 57 +     46317 atgtgattctggt--------gtg---cat-aattt-----gggaatcaatgAGTT--AAAGAC----AAGTCTTTCATG
i choHof1.scaffold_1338            C 0 C 0
e sorAra1.scaffold_245118              29209 7774 +     38740 I
e echTel1.scaffold_246123               4312 4388 -     12816 I
e oryCun2.chr3                     137513695 1376 + 155691105 I
e myoLuc2.GL429784                   8889536 2040 +  14577598 I
e gorGor3.chr8                     121284328 8675 + 145327772 T
e loxAfr3.scaffold_8                67679239 3044 +  85640724 I
e pteVam1.scaffold_9062                51215 1943 +     66173 I
e tarSyr1.scaffold_52304               12306 1183 +     14295 I
e oviAri1.chr9                      68467306 2667 - 100831284 I
e melGal1.chr3                      88078472 9551 + 100405168 I
e sarHar1.chr2_GL841388_random        481984 12896 +   1237177 I
e melUnd1.JH556481                    782640 58368 +   3508697 I
e turTru2.JH479543                     20044 2626 -    135452 I
e monDom5.chr3                     395438024 14746 + 527952102 I
e proCap1.scaffold_5125                48935 1945 +     62060 I
e chrPic1.JH584538                    404458 7740 +   8176890 I
e tupBel1.scaffold_119809.1-330533     14648 1054 +    330533 I
e galGal4.chr2                     136949488 65088 + 148809762 I

a score=112545.000000
s mm10.chr15                        56690282 25 + 104043685 TCCTCCTTCCCCATGATGGGCA-----TT-A
s rn5.chr7                          97077311 25 + 143501887 TCCTCCTTCCCCGTGATGGGCA-----TG-A
i rn5.chr7                         C 0 C 0
s hetGla2.JH602048                   9046183 26 -  42145720 CCCTCATTTAC----ACTGGCACCTCCTC-A
i hetGla2.JH602048                 I 8 C 0
s speTri2.JH393280                  21197977 29 -  46620681 GCCTCATTTGCATTGATGCACA-TCCTTT-C
i speTri2.JH393280                 I 7 C 0
s ochPri2.scaffold_3008                36660 28 +    168654 ACCTCAACTGCATTGCT--ACACTTTCTT-A
i ochPri2.scaffold_3008            I 7 C 0
s hg19.chr8                        122648459 29 + 146364022 ACCTCATTCACATTGATACCCA-TCCCTG-A
i hg19.chr8                        I 12 C 0
s panTro4.chr8                     120285483 29 + 143986469 ACCTCATTCACATTGATACCCA-TCCCTG-A
i panTro4.chr8                     I 12 C 0
s ponAbe2.chr8                     129323502 29 + 153482349 ACCTCATTCACATTGATACCCA-TCCCTG-A
i ponAbe2.chr8                     I 12 C 0
s nomLeu2.GL397267                  35741286 29 +  48819562 ACCTCATTCACATTGATACCCA-TCCCTG-A
i nomLeu2.GL397267                 I 12 C 0
s rheMac3.chr8                     126562763 29 + 150158102 ACCTCATTCACATTGATACCCA-TCCCTG-A
i rheMac3.chr8                     I 12 C 0
s papHam1.scaffold1185                 76017 29 +    226188 ACCTCATTCACATTGATACCCA-TCCCTG-A
i papHam1.scaffold1185             I 12 C 0
s calJac3.chr16                     23626171 29 -  96796970 ACCTCATTCACATTGATACCCA-TCCCTG-A
i calJac3.chr16                    I 12 C 0
s saiBol1.JH378158                   9048240 29 -  16265076 ACCTCATTCACATTTATACCCA-TCCCTG-A
i saiBol1.JH378158                 I 12 C 0
s micMur1.scaffold_4913                88230 29 +    135929 AACTCATCTGTATTCACACACG-TCCCTT-A
i micMur1.scaffold_4913            I 12 C 0
s otoGar3.GL873523                  39378555 29 -  47749213 ACCTCATTTGCATTCACACACG-TCCTTT-A
i otoGar3.GL873523                 I 12 C 0
s susScr3.chr4                      18483987 29 + 143465943 ATCTGGTTTGCATGGTTGCAGA-GTCCTT-T
i susScr3.chr4                     I 12 C 0
s vicPac1.scaffold_13                1515366 29 +   2369290 GTGTCCTTCGCATGGATACACA-CCCCTT-C
i vicPac1.scaffold_13              I 12 C 0
s bosTau7.chr14                     63540387 29 -  81216349 ACCTCATTTGGACAGATACACA-TCCCTC-A
i bosTau7.chr14                    I 12 C 0
s felCat5.chrF2                     64499994 29 +  82763536 ATT-TATTTGGATCGATATGCA-TTCCTCCA
i felCat5.chrF2                    I 12 C 0
s canFam3.chr13                     20335191 27 +  63241923 ATT-TATTTGCATTGACACACA---CACACA
i canFam3.chr13                    I 12 C 0
s ailMel1.GL193711.1                  153959 16 -    529242 attctaattgcagcAA---------------
i ailMel1.GL193711.1               I 9 C 0
s equCab2.chr9                      64364627 13 +  83561422 ATC-TCATTGCAT-----------------A
i equCab2.chr9                     I 12 C 0
s triMan1.JH594628                   9781597 29 +  24477914 ATCTCGTTTGCGTTGATACACA-TCCCTT-A
i triMan1.JH594628                 C 0 C 0
s dasNov3.JH579962                   3294591 29 +   3334091 ACCTCATCTGCATGGACACACA-TGCCTT-A
i dasNov3.JH579962                 C 0 C 0
s choHof1.scaffold_1338                22715 28 +     46317 ACCT-GTTTGCATGGACACACA-TGCCTT-A
i choHof1.scaffold_1338            C 0 C 0
e sorAra1.scaffold_245118              29209 7774 +     38740 I
e echTel1.scaffold_246123               4312 4388 -     12816 I
e oryCun2.chr3                     137513695 1376 + 155691105 I
e myoLuc2.GL429784                   8889536 2040 +  14577598 I
e gorGor3.chr8                     121284328 8675 + 145327772 T
e loxAfr3.scaffold_8                67679239 3044 +  85640724 I
e cavPor3.scaffold_95                5255370 1757 -   5884597 I
e pteVam1.scaffold_9062                51215 1943 +     66173 I
e tarSyr1.scaffold_52304               12306 1183 +     14295 I
e oviAri1.chr9                      68467306 2667 - 100831284 I
e melGal1.chr3                      88078472 9551 + 100405168 I
e sarHar1.chr2_GL841388_random        481984 12896 +   1237177 I
e melUnd1.JH556481                    782640 58368 +   3508697 I
e turTru2.JH479543                     20044 2626 -    135452 I
e monDom5.chr3                     395438024 14746 + 527952102 I
e proCap1.scaffold_5125                48935 1945 +     62060 I
e chrPic1.JH584538                    404458 7740 +   8176890 I
e tupBel1.scaffold_119809.1-330533     14648 1054 +    330533 I
e galGal4.chr2                     136949488 65088 + 148809762 I

a score=355128.000000
s mm10.chr15                        56690307 69 + 104043685 TA---------TGGTTTCCTT----CTGTTAG--TTTTTAGGACTAGAAATCTGAGCTAGA-----------------------------GGTTGAAGACCATAGGAAGGTA----T
s rn5.chr7                          97077336 69 + 143501887 TG---------TGGTTTCCTT----CTGTGAG--GTTTTAGAACTAGAAATCTGGTTTAGA-----------------------------AGGTGAAGATCATAGGAGAGCA----A
i rn5.chr7                         C 0 C 0
s hetGla2.JH602048                   9046209 86 -  42145720 TG---------TG--TCCCCT----CTGCCAC--TGTCCCCAGCTAGAAATCTGAGGCAGAA-----CACA-GACCTCCCTC-TG--ATGGGTCACACACTAGAACAGAGTA-----
i hetGla2.JH602048                 C 0 C 0
s speTri2.JH393280                  21198006 94 -  46620681 TG---------TGGATTCCCT----CTGCTAA--TGTCCCTGTCTAGAAATCTGAGACAAAAATACTCACATGAAATCCCTC-CC--CGAAGTCT----TCACATTAGAATACTT-G
i speTri2.JH393280                 C 0 C 0
s oryCun2.chr3                     137515071 91 + 155691105 TA---------TGTATTTCCT----CTGCTAC--TGTCCTCAATTAGAAACCTGATATAGA--CGACTACTTTAAATCCCCC-AA--T--AATCT----TCACATTAGCACACATAA
i oryCun2.chr3                     I 1376 C 0
s ochPri2.scaffold_3008                36688 91 +    168654 TA---------TATATTTCCT----CTGCTAC--TGTCCTCAGTTAGAAATCTGAAGTAGAAGTGCCCACTTTAAATCACCT-AG--G--AGTCA----TCACATCAGTGCACAT--
i ochPri2.scaffold_3008            C 0 C 0
s hg19.chr8                        122648488 74 + 146364022 TG---------TGTATTCCCT----CTGCTAC--TGTCCCTACGTAGAAATCTGAGATAGGAGGACCCAAATGAAGTCTCCC-CG--C--AGCA-----------------------
i hg19.chr8                        C 0 I 22
s panTro4.chr8                     120285512 74 + 143986469 TG---------TGTATTCCCT----CTGCTAC--TGTCCCTAAGTAGAAATCTGAGATAGGAGGACCCAAATGAAGTCTCCC-CG--C--AGCA-----------------------
i panTro4.chr8                     C 0 I 22
s ponAbe2.chr8                     129323531 74 + 153482349 TG---------TGTATTCCCT----CTGCTAC--TGTCCCTAAGGAGAAATCTGAGATAGGAGAACCCAAATGAAGCCTCCC-CG--C--AGCA-----------------------
i ponAbe2.chr8                     C 0 I 22
s nomLeu2.GL397267                  35741315 74 +  48819562 TG---------TGTATTCCCT----CTGCTGC--TGTCCGTAAGTACAAATCTGAGATAGGAGGACCCAGATGAAGTCTCCC-TG--C--AGCA-----------------------
i nomLeu2.GL397267                 C 0 I 22
s rheMac3.chr8                     126562792 74 + 150158102 TG---------TGTATTCCCT----CTGCTAC--TGTCCCTAAGTAGAAATCTGAGATAGGAGGACCCAAATGAAGTCTCCC-CC--C--AGCA-----------------------
i rheMac3.chr8                     C 0 I 22
s papHam1.scaffold1185                 76046 74 +    226188 TG---------TGTATTCCCT----CTGCTAC--TGTCCCTAAGTAGAAATCTGAGATAGGAGGACCCAAATGAAGTCTCCC-CC--C--AGCA-----------------------
i papHam1.scaffold1185             C 0 I 22
s calJac3.chr16                     23626200 72 -  96796970 TG---------TGTATTCCCT----CTGCTAC--TAACCTTAAGTAGAAATCTGAGATAGGAGTACCCAAATGAAGTCTCCC-CC------AAA-----------------------
i calJac3.chr16                    C 0 I 21
s saiBol1.JH378158                   9048269 73 -  16265076 TG---------TGTATTCCCT----CTGCTAC--TGTCCCTAAGTAGAAATCTGAGATAAGAGTACCCAAATGAAGTCTCCC-CC-----GAAA-----------------------
i saiBol1.JH378158                 C 0 I 22
s micMur1.scaffold_4913                88259 75 +    135929 TG---------TGCATTTCCT----CTGCTAC--TATCCCCAACTAGAAATCTGAAATAAAAGTATCCAAATGAAGTCCCCTGTC--C--AATA-----------------------
i micMur1.scaffold_4913            C 0 I 22
s otoGar3.GL873523                  39378584 75 -  47749213 TG---------TACATTTCCT----CTGCTAC--AATCCCCAATTAGAAATCTGAAATAAAAGTACCCAAATGACGTCCCCCACA--C--ACTA-----------------------
i otoGar3.GL873523                 C 0 I 22
s susScr3.chr4                      18484016 64 + 143465943 CG---------TGTATTACCT----CTGCTAC--CATCCTCAACTGGAAATCCAA-GCAGAAGTACCCAAATGAAGACTC-------------------------------------
i susScr3.chr4                     C 0 I 6
s vicPac1.scaffold_13                1515395 73 +   2369290 TGTGAATTGCCTGTGTTGCCT----CTGCTAC--TGTTCTGAACTAGAAATCCAA-ACAGAAGCACCCACATGAAGACTC-------------------------------------
i vicPac1.scaffold_13              C 0 I 6
s bosTau7.chr14                     63540416 64 -  81216349 GG---------TGTATTGCCG----CTGCCAC--TGTCCTCAGCCCGAAATCCTA-AGAGAAGTACCCAGATGACGCCTC-------------------------------------
i bosTau7.chr14                    C 0 I 6
s felCat5.chrF2                     64500023 61 +  82763536 TG---------CATATTGCCT----CTGCTAC--TGTCCTCAACTAGAAATCCGA---AAAAGTA-CTAAACGGAGCCTC-------------------------------------
i felCat5.chrF2                    C 0 I 6
s canFam3.chr13                     20335218 69 +  63241923 TC---------CCTCCTGTGTATTGTTGCTAC--TGTTCTTGACCAGAAATCCGAGGTAAAAGTACCCAAAGAAAGCCTC-------------------------------------
i canFam3.chr13                    C 0 I 6
s ailMel1.GL193711.1                  153975 58 -    529242 ---------------CTGCGT----CTGCTAC--TGTCCTCAACCAG-AATCGGAGGTAAAAGTACCCAAATGAAGCCTC-------------------------------------
i ailMel1.GL193711.1               C 0 I 6
s equCab2.chr9                      64364640 65 +  83561422 TG---------TGTATAGCCT----CTGCTGC--TGCCCTCCACTAGAAATCCAAGATTGAAGTACCCAGATGAACCCTC-------------------------------------
i equCab2.chr9                     C 0 I 6
s triMan1.JH594628                   9781626 73 +  24477914 TG---------CGTACTTCCT----CTGCCACTCTGTTTCCAACTAGAAATAAGAGGCAGAAGTACCCAAATGAAATCCCCC-AAAA------------------------------
i triMan1.JH594628                 C 0 C 0
s dasNov3.JH579962                   3294620 71 +   3334091 TG---------GCTACTCCCT----CTGCAGCTCTGGCCCTAACTAGAAATCGGAAGCAGAAGCACCCCAGTGAAGTCCCCT-TA--------------------------------
i dasNov3.JH579962                 C 0 C 0
s choHof1.scaffold_1338                22743 70 +     46317 TA---------CCTACTCCCT----CTACAGCTTTGGCCCCGACTGGAAATCCGAGGCAGAAGCA-CCCAGTGAAGTCCCCT-CA--------------------------------
i choHof1.scaffold_1338            C 0 C 0
e sorAra1.scaffold_245118              29209 7774 +     38740 I
e echTel1.scaffold_246123               4312 4388 -     12816 I
e myoLuc2.GL429784                   8889536 2040 +  14577598 I
e gorGor3.chr8                     121284328 8675 + 145327772 T
e loxAfr3.scaffold_8                67679239 3044 +  85640724 I
e cavPor3.scaffold_95                5255370 1757 -   5884597 I
e pteVam1.scaffold_9062                51215 1943 +     66173 I
e tarSyr1.scaffold_52304               12306 1183 +     14295 I
e oviAri1.chr9                      68467306 2667 - 100831284 I
e melGal1.chr3                      88078472 9551 + 100405168 I
e sarHar1.chr2_GL841388_random        481984 12896 +   1237177 I
e melUnd1.JH556481                    782640 58368 +   3508697 I
e turTru2.JH479543                     20044 2626 -    135452 I
e monDom5.chr3                     395438024 14746 + 527952102 I
e proCap1.scaffold_5125                48935 1945 +     62060 I
e chrPic1.JH584538                    404458 7740 +   8176890 I
e tupBel1.scaffold_119809.1-330533     14648 1054 +    330533 I
e galGal4.chr2                     136949488 65088 + 148809762 I

a score=-343236.000000
s mm10.chr15                        56690376 39 + 104043685 GTCTTCATATCAGAGCAGATCAATGCT----------------------------------ATTC----TCATACTG
s rn5.chr7                          97077405 38 + 143501887 GTCTTCATAGTGGAGCATACCAATGCT----------------------------------CTTC----TCA-AATG
i rn5.chr7                         C 0 C 0
s hetGla2.JH602048                   9046295 33 -  42145720 GCCTCTGGGGCTCCACACATGGA-GCT----------------------------------CCTC----CCC-----
i hetGla2.JH602048                 C 0 C 0
s speTri2.JH393280                  21198100 34 -  46620681 CCCTCTGGGATACAGCGCACTGAGACC----------------------------------CCTT----TCT-----
i speTri2.JH393280                 C 0 C 0
s oryCun2.chr3                     137515162 28 + 155691105 CCCTCCAAAACACTGAGCAGGAA----------------------------------------CC----CCC-----
i oryCun2.chr3                     C 0 C 0
s ochPri2.scaffold_3008                36779 15 +    168654 -------AAACAC------AGAA----------------------------------------CC----CAC-----
i ochPri2.scaffold_3008            C 0 C 0
s hg19.chr8                        122648584 52 + 146364022 CCCCCTGGAACACAAATCATGAACCCTCCCGACTCC----------------CCCTCCCAACCTC----CCT-----
i hg19.chr8                        I 22 C 0
s panTro4.chr8                     120285608 52 + 143986469 CCCCCTGGAACACAAATCATGAACCCTCCCAACTCC----------------CCCTCCCAACCTC----CCT-----
i panTro4.chr8                     I 22 C 0
s ponAbe2.chr8                     129323627 52 + 153482349 CCTCCTGGAACACAAATCATGAACCCTCCCAACTCC----------------CCCTCCCAACCTC----CCT-----
i ponAbe2.chr8                     I 22 C 0
s nomLeu2.GL397267                  35741411 51 +  48819562 CCCCC-GGAACACAAATCATGAACCCTCCCAACTCC----------------CCCTCCCAACCTC----CCT-----
i nomLeu2.GL397267                 I 22 C 0
s rheMac3.chr8                     126562888 52 + 150158102 CCCCCTGGAACACAAAGGATAAACCCTCCCAACTCC----------------CCCTCCCAACCTC----CCT-----
i rheMac3.chr8                     I 22 C 0
s papHam1.scaffold1185                 76142 52 +    226188 CCCCCTGGAACACAAAGGATAAACCCTCCCAACTCC----------------CCCTCCCAACCTC----CCT-----
i papHam1.scaffold1185             I 22 C 0
s calJac3.chr16                     23626293 52 -  96796970 CGCCCTGGAAGACAAAGCATGAACCCTCCCAACTCC----------------CCCTTCCAACCTC----CCT-----
i calJac3.chr16                    I 21 C 0
s saiBol1.JH378158                   9048364 52 -  16265076 CCGCCTGGAACACAAAGCATGAACCCTCCCGACTCC----------------CCCTCCCAACCTC----CCT-----
i saiBol1.JH378158                 I 22 C 0
s micMur1.scaffold_4913                88356 38 +    135929 CTCTCTGGGACACAGAGCATGAAGGCTCTT------------------------------CCCTT----CCC-----
i micMur1.scaffold_4913            I 22 C 0
s otoGar3.GL873523                  39378681 30 -  47749213 TCCTCTGGAACACAGAGCATGAAGACTCCC-----------------------------------------------
i otoGar3.GL873523                 I 22 C 0
s tupBel1.scaffold_119809.1-330533     15702  8 +    330533 ------------------------------------------------------------GCCTT----CCT-----
i tupBel1.scaffold_119809.1-330533 I 1054 C 0
s susScr3.chr4                      18484086 31 + 143465943 GGTTTCACTTTGGAG-------------------------------------CACCTGACCCTCC----TCT-----
i susScr3.chr4                     I 6 C 0
s vicPac1.scaffold_13                1515474 31 +   2369290 GCCTTCACGTTAGAG-------------------------------------CCCATGACCCTCC----CTT-----
i vicPac1.scaffold_13              I 6 C 0
s bosTau7.chr14                     63540486 34 -  81216349 GTCTTCACATTAGA--------------------------------------CACATGACCCACCCCTTCCT-----
i bosTau7.chr14                    I 6 C 0
s felCat5.chrF2                     64500090 58 +  82763536 GTCTTCACATTAGAGAACATTACCCTCTGGGACATA------TTAGA----GCACATGACCCTCA----TCT-----
i felCat5.chrF2                    I 6 C 0
s canFam3.chr13                     20335293 58 +  63241923 GTCTTCACATTATAGCACATTACCCTCTGGGACATA------TTAGA----GCACATGACCCTCA----GCT-----
i canFam3.chr13                    I 6 C 0
s ailMel1.GL193711.1                  154039 58 -    529242 GTCTTCACATTACAGCACAGTACCCTCTGGGACATA------TTAGA----GCACATGACCCTCA----TCT-----
i ailMel1.GL193711.1               I 6 C 0
s equCab2.chr9                      64364711 58 +  83561422 GTCGTCTCTTTAGAGCACATTACCCTCTGGGACACA------TTAGA----TCATATGACCCTCC----CCT-----
i equCab2.chr9                     I 6 C 0
s triMan1.JH594628                   9781699 67 +  24477914 -GTCTTCAATTAGAGCATATTCCTCTATGGGACACAAAGCAGGAAGGGTTGAAGATCCCCTCCCC----TCC-----
i triMan1.JH594628                 C 0 I 13
s dasNov3.JH579962                   3294691 26 +   3334091 ------------------------------------------GAGGGTTTCATGTTAGACACATT----ACT-----
i dasNov3.JH579962                 C 0 I 1
s choHof1.scaffold_1338                22813 22 +     46317 ------------------------------------------GCAGG----AAGCTCTGCTCTCC----CCT-----
i choHof1.scaffold_1338            C 0 I 7
e sorAra1.scaffold_245118              29209 7774 +     38740 I
e echTel1.scaffold_246123               4312 4388 -     12816 I
e myoLuc2.GL429784                   8889536 2040 +  14577598 I
e gorGor3.chr8                     121284328 8675 + 145327772 T
e loxAfr3.scaffold_8                67679239 3044 +  85640724 I
e cavPor3.scaffold_95                5255370 1757 -   5884597 I
e pteVam1.scaffold_9062                51215 1943 +     66173 I
e tarSyr1.scaffold_52304               12306 1183 +     14295 I
e oviAri1.chr9                      68467306 2667 - 100831284 I
e melGal1.chr3                      88078472 9551 + 100405168 I
e sarHar1.chr2_GL841388_random        481984 12896 +   1237177 I
e melUnd1.JH556481                    782640 58368 +   3508697 I
e turTru2.JH479543                     20044 2626 -    135452 I
e monDom5.chr3                     395438024 14746 + 527952102 I
e proCap1.scaffold_5125                48935 1945 +     62060 I
e chrPic1.JH584538                    404458 7740 +   8176890 I
e galGal4.chr2                     136949488 65088 + 148809762 I

a score=80063.000000
s mm10.chr15                        56690415 21 + 104043685 TGAC-CTGTGCT-------------------CTTCATT-TTT--------
s rn5.chr7                          97077443 18 + 143501887 TGAC-CCATG----------------------TTTGCT-CTT--------
i rn5.chr7                         C 0 C 0
s hetGla2.JH602048                   9046328 27 -  42145720 CGGC-CCCTGCT---GG----------CTTCCTCTGTC-TCT--------
i hetGla2.JH602048                 C 0 I 4
s speTri2.JH393280                  21198134 30 -  46620681 TTTC-TCCTTCTTCTGT----------CCTCCTCTCCC-TGT--------
i speTri2.JH393280                 C 0 C 0
s oryCun2.chr3                     137515190 21 + 155691105 TGAC-CTCTTTT-------------------CCCTTGC-CAG--------
i oryCun2.chr3                     C 0 C 0
s ochPri2.scaffold_3008                36794 18 +    168654 ---C-CTATTCT-------------------CCCTTTC-TGG--------
i ochPri2.scaffold_3008            C 0 C 0
s hg19.chr8                        122648636 27 + 146364022 TCTC-CCCTTCT---GA----------CCTTCTCTTCC-TCT--------
i hg19.chr8                        C 0 I 4
s panTro4.chr8                     120285660 27 + 143986469 TCTC-CCCTTCT---GA----------CCTTCTCTTCC-TCT--------
i panTro4.chr8                     C 0 I 4
s ponAbe2.chr8                     129323679 27 + 153482349 TCTC-CCCTTCT---GA----------CCTTCTCTTCC-TCT--------
i ponAbe2.chr8                     C 0 I 4
s nomLeu2.GL397267                  35741462 26 +  48819562 TCTC-CCC-GCT---GA----------CCTTCTTTTTC-TCT--------
i nomLeu2.GL397267                 C 0 I 4
s rheMac3.chr8                     126562940 27 + 150158102 TCTC-CCCTTCT---GA----------CCTTCTCTTCC-TCT--------
i rheMac3.chr8                     C 0 I 4
s papHam1.scaffold1185                 76194 27 +    226188 TCTC-CCTTTCT---GA----------CCTTCTCTTCC-TCT--------
i papHam1.scaffold1185             C 0 I 4
s calJac3.chr16                     23626345 27 -  96796970 TCTC-TCCTTGT---GA----------CCCTCTCTTCC-TCA--------
i calJac3.chr16                    C 0 I 4
s saiBol1.JH378158                   9048416 27 -  16265076 TCTC-CCCTTGT---GA----------CCTTCTCTTCC-TCA--------
i saiBol1.JH378158                 C 0 I 4
s micMur1.scaffold_4913                88394 27 +    135929 TTTG-CCCTTCT---GA----------CCTCCTCTTCT-TCT--------
i micMur1.scaffold_4913            C 0 I 4
s otoGar3.GL873523                  39378711 23 -  47749213 -----CTCTTCT---GA----------CCTCCTCTTCC-TCT--------
i otoGar3.GL873523                 C 0 I 4
s tupBel1.scaffold_119809.1-330533     15710 25 +    330533 CTTCAGCCCTCT---GG----------CCTCCTCT----CCT--------
i tupBel1.scaffold_119809.1-330533 C 0 I 4
s susScr3.chr4                      18484117 27 + 143465943 TCTC-TCTTTCT---GA----------CCTTCTCTACC-TCT--------
i susScr3.chr4                     C 0 I 4
s vicPac1.scaffold_13                1515505 28 +   2369290 ACTC-CCTGTCT---GA----------CCTCCTCTCCCTTTT--------
i vicPac1.scaffold_13              C 0 I 4
s bosTau7.chr14                     63540520 27 -  81216349 TCTC-CCCTTCT---GA----------CCTCCTCTTCC-TCT--------
i bosTau7.chr14                    C 0 I 4
s felCat5.chrF2                     64500148 27 +  82763536 TTTC-CCCTTCT---GA----------CCTCCTCTCCC-TCT--------
i felCat5.chrF2                    C 0 I 4
s canFam3.chr13                     20335351 27 +  63241923 TGTC-CCCTTCT---GA----------CCTCCTCTCCT-TCT--------
i canFam3.chr13                    C 0 I 4
s ailMel1.GL193711.1                  154097 27 -    529242 TGTC-CCCTTCT---GA----------CCTCCTCTCCC-TCT--------
i ailMel1.GL193711.1               C 0 I 4
s equCab2.chr9                      64364769 27 +  83561422 TGTC-CCCTTCT---GA----------CCTCCTCTTCC-TGT--------
i equCab2.chr9                     C 0 I 4
s loxAfr3.scaffold_8                67682283 21 +  85640724 -----------T---GA----------CCTCTACTCCC-TGTC----TGG
i loxAfr3.scaffold_8               I 3044 C 0
s proCap1.scaffold_5125                50880 21 +     62060 -----------T---GG----------CCTCTCCTTCC-TGTC----TGG
i proCap1.scaffold_5125            I 1945 C 0
s triMan1.JH594628                   9781779 21 +  24477914 -----------T---GA----------CCTCTACTCCC-CGTC----TGG
i triMan1.JH594628                 I 13 C 0
s dasNov3.JH579962                   3294718 35 +   3334091 -----------T---GAGAAACAAGTTCCCCCTTTCCC-TCTCTGAAGGA
i dasNov3.JH579962                 I 1 C 0
s choHof1.scaffold_1338                22842 21 +     46317 -----------T---GA----------CCTCCTCTCCC-TCCC----AGA
i choHof1.scaffold_1338            I 7 C 0
e sorAra1.scaffold_245118              29209 7774 +     38740 I
e echTel1.scaffold_246123               4312 4388 -     12816 I
e myoLuc2.GL429784                   8889536 2040 +  14577598 I
e gorGor3.chr8                     121284328 8675 + 145327772 T
e cavPor3.scaffold_95                5255370 1757 -   5884597 I
e pteVam1.scaffold_9062                51215 1943 +     66173 I
e tarSyr1.scaffold_52304               12306 1183 +     14295 I
e oviAri1.chr9                      68467306 2667 - 100831284 I
e melGal1.chr3                      88078472 9551 + 100405168 I
e sarHar1.chr2_GL841388_random        481984 12896 +   1237177 I
e melUnd1.JH556481                    782640 58368 +   3508697 I
e turTru2.JH479543                     20044 2626 -    135452 I
e monDom5.chr3                     395438024 14746 + 527952102 I
e chrPic1.JH584538                    404458 7740 +   8176890 I
e galGal4.chr2                     136949488 65088 + 148809762 I

a score=3008610.000000
s mm10.chr15                        56690436 161 + 104043685 C---TTTGAAGT-TGCA-TTGCTG-TT-TCTAGCCTCACCTAGGTTTCCCTACCAAAGACCCTGGAGCCAACTAGGCAGGA--TTAGAATACAAAGCCTT----TTAACAGCCCTGTCACACTA---ATG-------------GTTCTTGGGGTTTCAAATGTC-TCTCAA-TTGTGCCATCAGTTTTAATC
s rn5.chr7                          97077461 153 + 143501887 C---TTTGAAGT-TGCC-TTGCCG-TT-TGTAGCCTCACCTAGGTTTCCCTACC--------TCGAGCCAACTAGGCGAGA--TCAGAACACAAAGCCTT----TTAATACCCCTGTCACTCAA---ATG-------------GAACTTTAGGTTTCAAATGTC-TCTCAG-TTGCGACATCCTTTTTAATC
i rn5.chr7                         C 0 C 0
s hetGla2.JH602048                   9046359 169 -  42145720 C---TTTGAAGTCTGCC-TTTTTC-TC-TCCTGCCCACTGCAGGTGACCTCAGA-AAGACTCTGGAGCCAAGCTGGCTGAA--TTAGGGCAC-AAGCCTT----TTAAAGGTCTTCTCACCCCT---ATGTTGGCTGGATCTAGAATTGCAGGTTTCAGATTTC-TCTGAA-----ACCATCAATTTTAATC
i hetGla2.JH602048                 I 4 C 0
s speTri2.JH393280                  21198164 167 -  46620681 C---TTTGAAGT---------CTG-CC-TACAGTTTCAAGGCAGTTATACTAGCAAAGACCCTGGCATCAAGTTGGCAGGA--TTAGGATAC-AAGCCTT----TTAAACACACCATCACACCA---GTGGTAGCTGCATCCAGAGCCTTAGGTTTCAGATTTC-TCTTTCTTTGCACCATCAATTTTAATC
i speTri2.JH393280                 C 0 C 0
s oryCun2.chr3                     137515211 167 + 155691105 C---TTTGAAGTTTGCC-TTTTTT-CC-CCCAGTCCCATGGCACTTATCCTAGTAGAGACCCTGGAGCCAAGCCGGCAAGG--TTAGGATAC-AGGTCTT----TTAAAAGCTTT-CCACCCCA---GTGGTGTCTG------GAGTTTCAGGTTTCAAATTTC-TCTTCC-TTTGCACATCAGTATTAACC
i oryCun2.chr3                     C 0 C 0
s ochPri2.scaffold_3008                36812 174 +    168654 C---TTTGAACTCTGCC-CTTCTC-CTGCTAAGCCCCACGGCAGTCATCCTAGGAG-GGTCTTGGAACCAAGCTGGTAAGA--TTAGGACAG-GAGACTT----TTAAAAGCCTTACCATACAA---GTGGTGTCTGGATCCCGAGTTGTAGGTTTCAAATTTC-TCTTCC-GTTTTTCATCACTATTAACC
i ochPri2.scaffold_3008            C 0 C 0
s hg19.chr8                        122648667 177 + 146364022 C---TTTGAAGTCTGCC-TTTTTC-TC-TCCAGTCCCACTGCAGTTATCCTAGCAAAGACCCTTGAGCCAAGCTTCCAGGG--TTAGTATAC-AAGCCTTTT--TTACAGGACTTGTCACTCCA---GCGGTGTCTGGGTTCAGAACTGTAGGTTTCAGATTTC-TTTTCCTTTGCACCATCtatattaata
i hg19.chr8                        I 4 C 0
s panTro4.chr8                     120285691 177 + 143986469 C---TTTGAAGTCTGCC-TTTTTC-TC-TCCAGTCCCACTGCAGTTATCCTAGCAAAGACCCTTGAGCCAAGCTTCCAGGG--TTAGTATAC-AAGCCTTTT--TTACAGGACTTGTCACTCCA---GCGGTGTCTGGGTTCAGAACTGTAGGTTTCAGATTTC-TTTTCCTTTGCACCATCtatattaata
i panTro4.chr8                     I 4 C 0
s ponAbe2.chr8                     129323710 177 + 153482349 C---TTTGAAGTCTGCC-TTTTTC-TC-TCCAGTCCCACTGCAGTTATCCTAGCAAAGACCCTGGAGCCAAGCTTCCAGGG--TTAGTATAC-AAGCCTTTT--TTACAGGACTTGTCACCCCA---GCAGTGTCTGGGTTCAGAACTGTAGGTTTCAGATTTC-TTTTCCTTTGCACCATCTATATTAATA
i ponAbe2.chr8                     I 4 C 0
s nomLeu2.GL397267                  35741492 177 +  48819562 C---TTTTAAGTCTGCC-TTTTTC-TC-TCCAGTCCCACTGCAGTTATCCTAGCAAAGACCCTTGAGCCAAGCTTCCAAGG--TTAGTATAC-AAGCCTTTT--TTACAGGACTTGTCACCCCA---GCGGTGTCTGGGTTCAGAACTGTAGGTTTCAGATTTC-TTTTCCTTTGCACCATGTATATTAACA
i nomLeu2.GL397267                 I 4 C 0
s rheMac3.chr8                     126562971 177 + 150158102 C---TTTGAAGTCTGCC-TTTTTC-TC-TCCAGTCCCACTGCAGTTATCCTAGCAAAGACCCTTGAGCCAAGCTTCCAGGG--TTATGATAC-AAGCCTTTG--TTACAGGACTTGTCACCCCA---GCGGTGTCTGGGTTCAGAACTGTAGGTTTCAGATTTC-TTTTCCTTTGCACCATCTATATTAATC
i rheMac3.chr8                     I 4 C 0
s papHam1.scaffold1185                 76225 178 +    226188 C---TTTGAAGTCTGCCTTTTTTC-TC-TCCAGTCCCACTGCAGTTATCCTAGCAAAGACCCTTGAGCCAAGCTTCCAGGG--TTATGATAC-AAGCCTTTG--TTATAGGACTTCTCACCCCA---GCGGTGTCTGGGTTCAGAACTGTAGGTTTCAGATTTC-TTTTCCTTTGCACCATCTATATTAATC
i papHam1.scaffold1185             I 4 C 0
s calJac3.chr16                     23626376 176 -  96796970 C---TTTGAAGTCTGCCTTTTTTC-TC-TCTAGTCCCACTGCAGTTATCCTAGCAAAGACCCTTGAGCCAAGCTTGCAGGC--TTAGAATAC-AAGCCTT----TTACAGGGCTTGTCACCCCA---GCGGTGTCTGGGTTCAGAACTGTAGGTTTCAGACTTC-TTTTCCTTTGCACCATCCATATGAATC
i calJac3.chr16                    I 4 C 0
s saiBol1.JH378158                   9048447 176 -  16265076 C---TTTGAAGTCTGCCTTTTTCC-TC-TCTAGTCCCACTGCACTTATCCTGGCAAAGACCCTTGAGCCAAGCTTGCAGGG--TTAGGATAC-AAGCCTT----TTACAGGATTTCTCACCACA---GCGGTGTCTGGGTTCAGAACTGTAGGTTTCAGATTTC-TTTTCCTTTGCACCGTCCATATGAATC
i saiBol1.JH378158                 I 4 C 0
s micMur1.scaffold_4913                88425 148 +    135929 C---TTTGAAGTCTGTC-TTTTTC-TC-TCCAATTCCAGTA-----------GCAA-GACCCTGGAGCCAAGCTGGCAGGA--TTAGGATAC----------------AGGCCTTGTCATCCCA---GCAGTGTCTGGATCCAGAACTGTAGATTTCATATCTC-TTTTCCTTCATACCA----TATTAATC
i micMur1.scaffold_4913            I 4 C 0
s otoGar3.GL873523                  39378738 147 -  47749213 C---TTAGAAGTCTGTC-TTTCTG-GC-TCCAGTTCTACTG-----------GCAA--------AGATCAAGCTGGCAGGG--TTAGGATAT--AGCTGT----TTAAAGCCCTTGTGTCCTCA---GCAGTGTCTGGACT--------TACATTTTTTGTTTT-TCTTCCTTTGCACCATCCGTATTTATC
i otoGar3.GL873523                 I 4 C 0
s tupBel1.scaffold_119809.1-330533     15739 175 +    330533 C---TTTGAAGTCTGCC-TTTTAC-TC-TGTAGTCCCACAACAGTTATCCTGACAAAGACTCCGGAGCCAAGCTGGCATGG--TTTGGATAT-GAGGTTT----TTAAAAATCTTGTCACCCAC---ATAATGACTGAATCCAGAGCTTTTGATTTTAGACTTC-TCTTCCTTCGAAGTATTAATATTAATC
i tupBel1.scaffold_119809.1-330533 I 4 C 0
s susScr3.chr4                      18484148 178 + 143465943 C----TTGAAGGTGGCC-TTTTTC-TT-TCCAGTCCCACAGCAATTGTTCTAGCAGAGACCCTGAAGTGAAGTTTGCAGGG--TTGGGTATT-ATGCCTTTCACTCAAAGACCTCGAAACTGGA---GCTCTGTCAGGATGCAGAGCCTCCGGGTTCAGATTTC-TCTTCCCTTGCACCATCAATATTGATC
i susScr3.chr4                     I 4 C 0
s vicPac1.scaffold_13                1515537 178 +   2369290 C---TTTGAAGTTGGCC-TTTTTC-TT-TCCAGTCTCACTGCACTTATTCTAGAAGAGACCCTGGAGCTGAGCTCACAGGA--TTAGAAAAG-ATGCCTT----TCAAAGACCTTGTCACTGGGTCTGCTGTGTCTGGATCCAGAGATTTGGGTTTCAGATTTC-TCTTTCTTTGCACCATCAATATTGATC
i vicPac1.scaffold_13              I 4 C 0
s bosTau7.chr14                     63540551 173 -  81216349 T---TTTGAAGTTGACC-TTTGTCTTT-TCCAGTACCACTGCACTTCTTCTAGCAGAGACCCTGGAGCTAATTCTGCAGGGGTTTAGCAAA--ACACCTT----TCAAAGACCTTGTCATCTGA---GATGTCTCTGGATCCAGAACTTTAGATTTCAGATTTC-TCTTTTTTTGTACC----ATGTTGATC
i bosTau7.chr14                    I 4 C 0
s felCat5.chrF2                     64500179 176 +  82763536 C---TTTGAAGTTGGCC-TTTGTC-TC-TCCAGTCCCACTGCATCGATCCTGACAGAGACCCTGGAGCCAAGCTCGCAAGG--TTAGGCAAT-AAGCCTT----TCAAAGGCCTTGTCACCCCA---GCTGTGTCTGCACCCACAGCTGTAGGTTTCGGATTTCTTCCTCATTTGTACCATCAGCAATGATC
i felCat5.chrF2                    I 4 I 1160
s canFam3.chr13                     20335382 171 +  63241923 C---TTTGAAGTTGGCC-TTTGTC-TT-ACCAGTCCCACTGCATTGATCCTAGCAGAGACCCTGGAGCCAAGCTTGCAAGG--TTAGGCTTG-AGGCCTG----TCAAAGGCCTTGTCACCCCA---GCTGTGTCTGGATCCAGATCTCTGGGTTTCAGATTTC-TCTTCATTTGTACCATCAGTATT----
i canFam3.chr13                    I 4 C 0
s ailMel1.GL193711.1                  154128 175 -    529242 C---TTTGAAGTTGGCC-TTTGTC-TC-ACCAGCCCCACTGCATTGATCCTCACAGAGACCCTGGAGCCCAGCTTGCAAGG--TTAGGCAAT-GGGCCTT----TCAAAGGCCTTGTCACCCCA---GCTGTGTCTGGATCCAGCGCTGTGGGTTTCAGATTTC-TCTTCATGTGAACCATCGGTATTGATC
i ailMel1.GL193711.1               I 4 C 0
s equCab2.chr9                      64364800 178 +  83561422 CTTTTTTGAAGTTGGCC-TTTTTC-TC-TCCAGCCCCACTGCCATTATCCTAGCAGAGAGCCTGGAGCCAAGCTTGCAGGG--TTAGGCAAT-AAGCCTT----TCAAAGGTCCTGTCACCCTA---GCTGTGTCTGGATCCACAGCTTCAGGTTTCAGATTCC-TCTTCATTTGCACCATCAATATTGATC
i equCab2.chr9                     I 4 C 0
s myoLuc2.GL429784                   8891576 173 +  14577598 C---TTTGAAGTCTGCC-TCTTCC-TC-TCCAGCCCCACTGCGGTTCTCCCAGCAGAGAACCTGGAGCTGAGCTTGCAGGG--TTAGGCAAC-A-GCCTT----TCATAGGCCTTGTCCCCACA---GCTGTGTCTGGATCCAGAGCTTTAAGTTTCAGATTTC-T-TTCATATGCACCATCAATACTGATC
i myoLuc2.GL429784                 I 2040 C 0
s loxAfr3.scaffold_8                67682304 155 +  85640724 C---TTTGAAGTTTGTC-TTTTTC-TC-TCCATTTCCACTGAAGTTATCCTAGCAGAGACCCTGGAGCCAACGTTGCAGGG--TTAGAATTG-GACTC------------------------CA---GCTGTGTCTGGACCCAGAGCTTCAGGTTTCTGGTTTC-TCTTCCTTTGCACCATCAGTATTAATC
i loxAfr3.scaffold_8               C 0 C 0
s proCap1.scaffold_5125                50901 153 +     62060 C---TTTGAAGTTTATC-TTTTTC-TC-TCCATTTCCACTGAAGTTCTTCTAGCAGAGACCCTGGAGCAAGC-TTGCCAAG--TTAGAATTT-GAATC------------------------CA---GCTGTGTCTGGATCCAGAGCTTCATGTTTCTAGTTTC-TCTTCC-TTGTACCCTCAGTACTAATC
i proCap1.scaffold_5125            C 0 C 0
s triMan1.JH594628                   9781800 155 +  24477914 C---TTTGAAGTTTGTC-TTTTTC-TT-TCCATTTCCACTGAAGTTATCCCAGCAGAGACCCTGGAGCCAAGCTTGCAGGG--TTAGAATTT-GAGCG------------------------CA---GCTGTGTCTGGATCCAGAGCTTCAGGTTTCTGGTTTC-TCTTCCTTTGCACCATCAGTATTGATC
i triMan1.JH594628                 C 0 C 0
s dasNov3.JH579962                   3294753 171 +   3334091 C---TCTGAAGGTGGTC-TTTTGT-TC-TGCATTCCCACAGCAGTTATCCTAGTAGAGACTCTGGAACTAAGTTTGCAAAG--TTAGGATAG-GAGCCTT----TCAAAGGTCTTGTCAGCCCA---GCTGTGCCTGCATCCAGGGCTTCAGGTTTTAGGTTTC-TCTTCCTTTGCACCATCAGTCTT----
i dasNov3.JH579962                 C 0 C 0
s choHof1.scaffold_1338                22863 174 +     46317 C---TCTGAAGGGGGCA-TTTTTT-TC-TCCATTTCCACTGCAGTTATCCTAGCAGAGGCTCTGGAGCCAAGCTTGCAACA--TTAGGATAG-GAGCCTT----TCAAAGG-CTTGCCACCTCA---GCTGTGTCTGCATCCAGAGCTTCAGGTTTTAGGTTTC-TCTTCCTTTGTACCATCTGTCTTCAAC
i choHof1.scaffold_1338            C 0 C 0
e sorAra1.scaffold_245118              29209 7774 +     38740 I
e echTel1.scaffold_246123               4312 4388 -     12816 I
e gorGor3.chr8                     121284328 8675 + 145327772 T
e cavPor3.scaffold_95                5255370 1757 -   5884597 I
e pteVam1.scaffold_9062                51215 1943 +     66173 I
e tarSyr1.scaffold_52304               12306 1183 +     14295 I
e oviAri1.chr9                      68467306 2667 - 100831284 I
e melGal1.chr3                      88078472 9551 + 100405168 I
e sarHar1.chr2_GL841388_random        481984 12896 +   1237177 I
e melUnd1.JH556481                    782640 58368 +   3508697 I
e turTru2.JH479543                     20044 2626 -    135452 I
e monDom5.chr3                     395438024 14746 + 527952102 I
e chrPic1.JH584538                    404458 7740 +   8176890 I
e galGal4.chr2                     136949488 65088 + 148809762 I

a score=1165735.000000
s mm10.chr15                        56690597  93 + 104043685 ATGTGC---------------TTCTATAACATCAGT-CTTCCAGCCG--CTAGTGGCTCCTGGGCTTCACCCTCCTGCA--GTGCTC-----------ATAGTGG-A-AGAG-----GAAA---T--TAC--------------------AGTGAG
s rn5.chr7                          97077614  89 + 143501887 AGGGGC---------------TTCTACAACGTCAGC-CTT--AACTG--CTAGTGGCTCCTGACCTTCACCATCCTGCACAGTGTTA-----------ATAGTGG-A-AGAG-----GAAA---T--CA------------------------GAG
i rn5.chr7                         C 0 C 0
s hetGla2.JH602048                   9046528  97 -  42145720 AATCGC---------------TCCGAGGAGGTCAGT-TCCTCAGCTGCTCTGTTGGTTCCTGAACTTCACCATCCTAAACTTAGTTC-----------ACAGTGA-A-GGGG-----AAAG---C--TTC--------------------GAAGAC
i hetGla2.JH602048                 C 0 C 0
s speTri2.JH393280                  21198331  97 -  46620681 AATTAC---------------TCCTAGGATGCCAATACTCCCAACTGCTTGATTAGATCCTGAACTTTATCATCCTTAACTTACTTA-----------CCAAT-A-A-AGGG-----AACA---T--TCC--------------------AAAGAT
i speTri2.JH393280                 C 0 C 0
s oryCun2.chr3                     137515378 115 + 155691105 AGTTAC---------------TGCCAGGGCATCAATTCTCCCAGTTGCTCTATTAGTTCCTGAACTT---CATCTCAAACCTAGTTT-----------GCAGGGA-A-GGat-----aaaa---t--taaaaaaaaaaaaaataaGAAAGAAAGAC
i oryCun2.chr3                     C 0 C 0
s ochPri2.scaffold_3008                36986 100 +    168654 AGTAAC---------------TCCTTGGGTGTCAATTTTTCCAACTGCTCTTCTAATTCCTGAACATCACCATCTCAAACTTAGTTT-----------ACAGGGA-A-GGAT-----TAAA---T--TACAA------------------AAGGAC
i ochPri2.scaffold_3008            C 0 C 0
s hg19.chr8                        122648844 103 + 146364022 aattat---------------ttttaGGATGTGTGTTCTTCCAACTGCTCTACTGGTTCCTGAACTTCACCATCCTAAACTTAGTTC-----------ACAGTGT-A-GGGG-----AAAAAAAT--TACCA------------------AATGAC
i hg19.chr8                        C 0 C 0
s panTro4.chr8                     120285868 103 + 143986469 aattat---------------ttttaGGATGTGTGTTCTTCCAACTGCTCTACTGGTTCCTGAACTTCACCATCCTAAACTTAGTTC-----------ACAGTGT-A-GGGG-----AAAAAAAT--TACCA------------------AATGAC
i panTro4.chr8                     C 0 C 0
s ponAbe2.chr8                     129323887 102 + 153482349 AATTAT---------------TTCTAGGATGTGTGTTCTTCCAACTGCTCTACCGGTTCCTGAA-TTCACCATCCTAAACTTAGTTC-----------ACAGTGT-A-GGGG-----AAAAAAAT--TACCA------------------AATGAC
i ponAbe2.chr8                     C 0 C 0
s nomLeu2.GL397267                  35741669 103 +  48819562 AATTAT---------------TTCTAGGATGTGTGTTCTTCCAACTGCTCTACTGGTTCCTGAACTTCACCATCCTAAACTTAGTTC-----------ACAGGGT-A-GGGG-----AAAAAAAT--TACCA------------------AATGAG
i nomLeu2.GL397267                 C 0 C 0
s rheMac3.chr8                     126563148  99 + 150158102 AACTCT---------------TTCTAGGATGTGTATTCTTCCAACTGCTCTACTGGTTCCTGAACTTCACCATCCTAAACTTAGCTC-----------ACAGTGT-A-GGGG-----GAAATAAT--TACCA------------------AA----
i rheMac3.chr8                     C 0 C 0
s papHam1.scaffold1185                 76403  99 +    226188 AACTCT---------------TTCTAGGATGTGTATTCTTCCAACTGCTCTACTGGTTCCTGAACTTCACCATCCTAAACTTAGTTC-----------ACAGTGT-A-GGGG-----GAAATAAT--TACCA------------------AA----
i papHam1.scaffold1185             C 0 C 0
s calJac3.chr16                     23626552 120 -  96796970 AATTACTTCTAGGATAATATATTCTAGGATGTATATTCTTCCAACTGCTCAACTGGTTCCTGAACTTCATCATCCTAAAGTTAGTTC-----------ACAGTGT-A-GGGG-----GAAAAAAAATTGCCA------------------AAAGAC
i calJac3.chr16                    C 0 C 0
s saiBol1.JH378158                   9048623 101 -  16265076 AATTAT---------------TTCTAGGAGGTACATTCTTCCAACTGCTCTACTGGTTCTTGAACTTCATCATCCTAAAGTTAGTT-------------CAGTGT-A-GGGG-----GAAAAATG--TGCCA------------------AAAGAT
i saiBol1.JH378158                 C 0 C 0
s micMur1.scaffold_4913                88573 100 +    135929 AATTAT---------------TTCTAGGGTGCCAATTCTCCCAAAAGCTCCATTGGTTCCTAAACGTCACCACCTTCAATTTAGTTC-----------ACAGTGA-A-GGGG-----AAAA---T--CACAA------------------AAAGAT
i micMur1.scaffold_4913            C 0 C 0
s otoGar3.GL873523                  39378885 100 -  47749213 AATTAT---------------TTCTAGAATGTCAATTCTCCCCAAAGCTTTATTGGTTCCTAAACGTCATCATCCTAAACTTAGTTT-----------ACAGCAA-A-GGGG-----AAAA---T--CACAG------------------ACAGAC
i otoGar3.GL873523                 C 0 C 0
s tupBel1.scaffold_119809.1-330533     15914  94 +    330533 CACTAC---------------CTCAAGGATGTGAATTCTTCCAATTGCTCTATTGGTTCTTGAACTTTGCCATCC-----TTAATTC-----------ACAGTAA-A-GAGG-----AAAA---T--TACAA------------------AA-CAC
i tupBel1.scaffold_119809.1-330533 C 0 C 0
s susScr3.chr4                      18484326 101 + 143465943 AGTGACT--------------TCCTAAAATG--------CCCAAGTGCCTTATCAGTTCCAGAA-GTTGCTATCCTAAACTTCATCCTAAAGTTCACTGCACCAA-A-GGGG-----GGAA---T--TACGG------------------AAAG--
i susScr3.chr4                     C 0 I 868
s vicPac1.scaffold_13                1515715 110 +   2369290 AATGACT--------------TCCTAAGATGACTATTCTCCCAAGTGTGCTATTGATTCCTGAACGTCACCATTCTAAACTTCATCCCTAAATTCACTGTTACAA-A-GGGG-----GAAA---T--TACAG------------------GAAG--
i vicPac1.scaffold_13              C 0 I 2
s bosTau7.chr14                     63540724 110 -  81216349 AATGGCT--------------TCCTAAGATGCCCATTCTCCCAATTGT-CTATTTGTTCCCAAACTTCACCATCCTAAGCTTCATCCTAAAGTTCACTGCAGCAA-AGGGGG-----GAAA---T--TACAG------------------AAAG--
i bosTau7.chr14                    C 0 I 2
s canFam3.chr13                     20335553 110 +  63241923 AATTAC---------------TCCTAGGATGCCAATTCCCCCAACTGCCCTATCGGTTCCTGAATTTCACCATCACAAACTTCATCCTAAAGTTCAGCATGGCAA-A-GGAG-----AAAGT--T--TGCAA------------------AAAG--
i canFam3.chr13                    C 0 I 2
s ailMel1.GL193711.1                  154303 109 -    529242 GATTAC---------------TCCAAGGATGCCACTTCTCCCAACTGCCCTGTTGGTGCCTGAGTTTCACCATCATAAGCTTCATCCC-AAGTTCAGCGTGGCAA-A-GGGG-----AAAGT--T--TGCAA------------------AAAG--
i ailMel1.GL193711.1               C 0 I 2
s equCab2.chr9                      64364978 108 +  83561422 AATTAC---------------TCCTAGGATGCCAATTCTCCCAACTGCACTACTGGTTCCTGAACTTCATCATCCTAAACTTCATCCTAAAGTTCAG-GTGGCAA-A-GGGG-----AAAA---T--TACAA------------------AAAG--
i equCab2.chr9                     C 0 I 2
s myoLuc2.GL429784                   8891749  61 +  14577598 AATCAC---------------TCCTAGGATGCCAATACTCCCAACTGCCTT-----------------------------------------------ATGGCAA-A-GGGG-----AAAA---T--TAC-A------------------AAAG--
i myoLuc2.GL429784                 C 0 I 2
s loxAfr3.scaffold_8                67682459  95 +  85640724 AATTAT---------------TCCTAGGGTGTCAATTTTCCCAGCTGCCCTACTGATTCCTGAACTTCACCATCCTAAACTTAGTTC-----------ACAGAGT-G-A--------AAAA---T--TACAA------------------AATG--
i loxAfr3.scaffold_8               C 0 I 2
s proCap1.scaffold_5125                51054  89 +     62060 AGTTAC---------------TCCCAGGGTGTCCATTATCCCAACTGCCCTACTGGTTTCTGAA------TATTCTAAACTTAGTTC-----------GCAGTGT-G-A--------AAAA---T--GACGC------------------AAAG--
i proCap1.scaffold_5125            C 0 I 2
s triMan1.JH594628                   9781955  96 +  24477914 AACTAT---------------TCCTGGGATGTCAATTCTCCCAACTGCCCTATTGGTTCCTGAACTTCACCATCCTAAACTTAGTTC-----------ACAGTCTGG-A--------AAAA---T--TACAA------------------AAAG--
i triMan1.JH594628                 C 0 I 2
s dasNov3.JH579962                   3294924  96 +   3334091 AACCAC---------------TTCTAGGATGCCAAGTCTCCCAGCTGCCCTGCTGGTTCCTGAACTCCATGATCCTAAAATTAGTTC-----------ATAGTGC-A-GT-------AAAA---T--TACAA------------------AAAG--
i dasNov3.JH579962                 C 0 I 2
s choHof1.scaffold_1338                23037 103 +     46317 AGTTAC---------------TTCTAGGATGCTAATTCCCCCAACTGCCCTGTTGGTTCCTGAACTTCACCATCCTAAACTTAGTTC-----------ACAGTGC-A-ATAGAGTGGAAAA---T--TACAA------------------AAAG--
i choHof1.scaffold_1338            C 0 I 2
e sorAra1.scaffold_245118              29209 7774 +     38740 I
e echTel1.scaffold_246123               4312 4388 -     12816 I
e gorGor3.chr8                     121284328 8675 + 145327772 T
e cavPor3.scaffold_95                5255370 1757 -   5884597 I
e pteVam1.scaffold_9062                51215 1943 +     66173 I
e tarSyr1.scaffold_52304               12306 1183 +     14295 I
e oviAri1.chr9                      68467306 2667 - 100831284 I
e felCat5.chrF2                     64500355 1160 +  82763536 I
e melGal1.chr3                      88078472 9551 + 100405168 I
e sarHar1.chr2_GL841388_random        481984 12896 +   1237177 I
e melUnd1.JH556481                    782640 58368 +   3508697 I
e turTru2.JH479543                     20044 2626 -    135452 I
e monDom5.chr3                     395438024 14746 + 527952102 I
e chrPic1.JH584538                    404458 7740 +   8176890 I
e galGal4.chr2                     136949488 65088 + 148809762 I

a score=304027.000000
s mm10.chr15                        56690690 12 + 104043685 TTGACATGGAAT
s rn5.chr7                          97077703 12 + 143501887 TTGACATGGAAT
i rn5.chr7                         C 0 C 0
s hetGla2.JH602048                   9046625 12 -  42145720 CTGACACAGGAT
i hetGla2.JH602048                 C 0 C 0
s speTri2.JH393280                  21198428 12 -  46620681 TTGACATGAAAT
i speTri2.JH393280                 C 0 C 0
s oryCun2.chr3                     137515493 12 + 155691105 TTGCCATGGGAT
i oryCun2.chr3                     C 0 I 4
s ochPri2.scaffold_3008                37086 12 +    168654 TGGACGTAGGAT
i ochPri2.scaffold_3008            C 0 I 2113
s hg19.chr8                        122648947 12 + 146364022 TTGACATGGAAT
i hg19.chr8                        C 0 C 0
s panTro4.chr8                     120285971 12 + 143986469 TTGACATGGAAT
i panTro4.chr8                     C 0 C 0
s ponAbe2.chr8                     129323989 12 + 153482349 TTGACATGGAAT
i ponAbe2.chr8                     C 0 C 0
s nomLeu2.GL397267                  35741772 12 +  48819562 TTGACATGGAAT
i nomLeu2.GL397267                 C 0 C 0
s rheMac3.chr8                     126563247 11 + 150158102 -TGGCATGGAAT
i rheMac3.chr8                     C 0 C 0
s papHam1.scaffold1185                 76502 11 +    226188 -TGGCATGGAAT
i papHam1.scaffold1185             C 0 C 0
s calJac3.chr16                     23626672 12 -  96796970 TTGACATGGAAT
i calJac3.chr16                    C 0 C 0
s saiBol1.JH378158                   9048724 12 -  16265076 TTGACACAGAAT
i saiBol1.JH378158                 C 0 C 0
s micMur1.scaffold_4913                88673 12 +    135929 CTGACATGGAAT
i micMur1.scaffold_4913            C 0 C 0
s otoGar3.GL873523                  39378985 12 -  47749213 TTGGCATGGAAG
i otoGar3.GL873523                 C 0 C 0
s tupBel1.scaffold_119809.1-330533     16008 12 +    330533 TTGTCATGAAGT
i tupBel1.scaffold_119809.1-330533 C 0 C 0
s vicPac1.scaffold_13                1515827 12 +   2369290 TCAGCATGGAAT
i vicPac1.scaffold_13              I 2 C 0
s bosTau7.chr14                     63540836 12 -  81216349 CTGGCATGAAAT
i bosTau7.chr14                    I 2 C 0
s canFam3.chr13                     20335665 12 +  63241923 CTGGCATAGAAT
i canFam3.chr13                    I 2 C 0
s ailMel1.GL193711.1                  154414 12 -    529242 TTGGCCTGGAAT
i ailMel1.GL193711.1               I 2 C 0
s equCab2.chr9                      64365088 12 +  83561422 GTGGCATGGAAT
i equCab2.chr9                     I 2 C 0
s myoLuc2.GL429784                   8891812 12 +  14577598 TTGACATGGAAT
i myoLuc2.GL429784                 I 2 C 0
s loxAfr3.scaffold_8                67682556 12 +  85640724 TTGGCATGGAAT
i loxAfr3.scaffold_8               I 2 C 0
s proCap1.scaffold_5125                51145 12 +     62060 TTGGCATGGAAT
i proCap1.scaffold_5125            I 2 C 0
s triMan1.JH594628                   9782053 12 +  24477914 CTGGCATGGAAT
i triMan1.JH594628                 I 2 C 0
s dasNov3.JH579962                   3295022 12 +   3334091 TTGACATGGAAT
i dasNov3.JH579962                 I 2 C 0
s choHof1.scaffold_1338                23142 12 +     46317 TTGGCATGGAAT
i choHof1.scaffold_1338            I 2 C 0
e susScr3.chr4                      18484427 868 + 143465943 I
e sorAra1.scaffold_245118              29209 7774 +     38740 I
e echTel1.scaffold_246123               4312 4388 -     12816 I
e gorGor3.chr8                     121284328 8675 + 145327772 T
e cavPor3.scaffold_95                5255370 1757 -   5884597 I
e pteVam1.scaffold_9062                51215 1943 +     66173 I
e tarSyr1.scaffold_52304               12306 1183 +     14295 I
e oviAri1.chr9                      68467306 2667 - 100831284 I
e felCat5.chrF2                     64500355 1160 +  82763536 I
e melGal1.chr3                      88078472 9551 + 100405168 I
e sarHar1.chr2_GL841388_random        481984 12896 +   1237177 I
e melUnd1.JH556481                    782640 58368 +   3508697 I
e turTru2.JH479543                     20044 2626 -    135452 I
e monDom5.chr3                     395438024 14746 + 527952102 I
e chrPic1.JH584538                    404458 7740 +   8176890 I
e galGal4.chr2                     136949488 65088 + 148809762 I

a score=61976.000000
s mm10.chr15                        56690702 3 + 104043685 CTT
s rn5.chr7                          97077715 3 + 143501887 CTT
i rn5.chr7                         C 0 C 0
s hetGla2.JH602048                   9046637 3 -  42145720 CTT
i hetGla2.JH602048                 C 0 I 927
s speTri2.JH393280                  21198440 3 -  46620681 TTT
i speTri2.JH393280                 C 0 I 49
s oryCun2.chr3                     137515509 3 + 155691105 ATT
i oryCun2.chr3                     I 4 I 6
s hg19.chr8                        122648959 3 + 146364022 CTT
i hg19.chr8                        C 0 I 10
s panTro4.chr8                     120285983 3 + 143986469 CTT
i panTro4.chr8                     C 0 I 10
s ponAbe2.chr8                     129324001 3 + 153482349 CTT
i ponAbe2.chr8                     C 0 I 10
s nomLeu2.GL397267                  35741784 3 +  48819562 CTT
i nomLeu2.GL397267                 C 0 I 10
s rheMac3.chr8                     126563258 3 + 150158102 CTT
i rheMac3.chr8                     C 0 I 10
s papHam1.scaffold1185                 76513 3 +    226188 CTT
i papHam1.scaffold1185             C 0 I 10
s calJac3.chr16                     23626684 3 -  96796970 CTT
i calJac3.chr16                    C 0 I 10
s saiBol1.JH378158                   9048736 3 -  16265076 CTT
i saiBol1.JH378158                 C 0 I 10
s micMur1.scaffold_4913                88685 3 +    135929 CTC
i micMur1.scaffold_4913            C 0 I 10
s otoGar3.GL873523                  39378997 3 -  47749213 CTC
i otoGar3.GL873523                 C 0 I 10
s tupBel1.scaffold_119809.1-330533     16020 3 +    330533 CAT
i tupBel1.scaffold_119809.1-330533 C 0 I 10
s vicPac1.scaffold_13                1515839 3 +   2369290 CCT
i vicPac1.scaffold_13              C 0 I 2
s bosTau7.chr14                     63540848 3 -  81216349 CCT
i bosTau7.chr14                    C 0 I 618
s canFam3.chr13                     20335677 3 +  63241923 CTT
i canFam3.chr13                    C 0 I 15
s ailMel1.GL193711.1                  154426 3 -    529242 CTT
i ailMel1.GL193711.1               C 0 I 15
s equCab2.chr9                      64365100 3 +  83561422 CTT
i equCab2.chr9                     C 0 I 646
s myoLuc2.GL429784                   8891824 3 +  14577598 CTT
i myoLuc2.GL429784                 C 0 I 8
s loxAfr3.scaffold_8                67682568 3 +  85640724 CTT
i loxAfr3.scaffold_8               C 0 C 0
s proCap1.scaffold_5125                51157 3 +     62060 CTT
i proCap1.scaffold_5125            C 0 C 0
s triMan1.JH594628                   9782065 3 +  24477914 TTT
i triMan1.JH594628                 C 0 I 1054
s dasNov3.JH579962                   3295034 3 +   3334091 CTG
i dasNov3.JH579962                 C 0 C 0
s choHof1.scaffold_1338                23154 3 +     46317 CCT
i choHof1.scaffold_1338            C 0 C 0
e susScr3.chr4                      18484427 868 + 143465943 I
e ochPri2.scaffold_3008                37098 2113 +    168654 I
e sorAra1.scaffold_245118              29209 7774 +     38740 I
e echTel1.scaffold_246123               4312 4388 -     12816 I
e gorGor3.chr8                     121284328 8675 + 145327772 T
e cavPor3.scaffold_95                5255370 1757 -   5884597 I
e pteVam1.scaffold_9062                51215 1943 +     66173 I
e tarSyr1.scaffold_52304               12306 1183 +     14295 I
e oviAri1.chr9                      68467306 2667 - 100831284 I
e felCat5.chrF2                     64500355 1160 +  82763536 I
e melGal1.chr3                      88078472 9551 + 100405168 I
e sarHar1.chr2_GL841388_random        481984 12896 +   1237177 I
e melUnd1.JH556481                    782640 58368 +   3508697 I
e turTru2.JH479543                     20044 2626 -    135452 I
e monDom5.chr3                     395438024 14746 + 527952102 I
e chrPic1.JH584538                    404458 7740 +   8176890 I
e galGal4.chr2                     136949488 65088 + 148809762 I

a score=-3693.000000
s mm10.chr15                        56690705 1 + 104043685 C
s rn5.chr7                          97077718 1 + 143501887 C
i rn5.chr7                         C 0 C 0
s speTri2.JH393280                  21198492 1 -  46620681 C
i speTri2.JH393280                 I 49 C 0
s oryCun2.chr3                     137515518 1 + 155691105 A
i oryCun2.chr3                     I 6 C 0
s hg19.chr8                        122648972 1 + 146364022 G
i hg19.chr8                        I 10 C 0
s panTro4.chr8                     120285996 1 + 143986469 G
i panTro4.chr8                     I 10 C 0
s ponAbe2.chr8                     129324014 1 + 153482349 G
i ponAbe2.chr8                     I 10 C 0
s nomLeu2.GL397267                  35741797 1 +  48819562 G
i nomLeu2.GL397267                 I 10 C 0
s rheMac3.chr8                     126563271 1 + 150158102 G
i rheMac3.chr8                     I 10 C 0
s papHam1.scaffold1185                 76526 1 +    226188 G
i papHam1.scaffold1185             I 10 C 0
s calJac3.chr16                     23626697 1 -  96796970 G
i calJac3.chr16                    I 10 C 0
s saiBol1.JH378158                   9048749 1 -  16265076 G
i saiBol1.JH378158                 I 10 C 0
s micMur1.scaffold_4913                88698 1 +    135929 A
i micMur1.scaffold_4913            I 10 C 0
s otoGar3.GL873523                  39379010 1 -  47749213 A
i otoGar3.GL873523                 I 10 C 0
s tupBel1.scaffold_119809.1-330533     16033 1 +    330533 G
i tupBel1.scaffold_119809.1-330533 I 10 C 0
s loxAfr3.scaffold_8                67682571 1 +  85640724 A
i loxAfr3.scaffold_8               C 0 C 0
s proCap1.scaffold_5125                51160 1 +     62060 A
i proCap1.scaffold_5125            C 0 C 0
s dasNov3.JH579962                   3295037 1 +   3334091 T
i dasNov3.JH579962                 C 0 C 0
s choHof1.scaffold_1338                23157 1 +     46317 A
i choHof1.scaffold_1338            C 0 C 0
e susScr3.chr4                      18484427 868 + 143465943 I
e ochPri2.scaffold_3008                37098 2113 +    168654 I
e sorAra1.scaffold_245118              29209 7774 +     38740 I
e echTel1.scaffold_246123               4312 4388 -     12816 I
e myoLuc2.GL429784                   8891827 8 +  14577598 I
e ailMel1.GL193711.1                  154429 15 -    529242 I
e gorGor3.chr8                     121284328 8675 + 145327772 T
e triMan1.JH594628                   9782068 1054 +  24477914 I
e equCab2.chr9                      64365103 646 +  83561422 I
e bosTau7.chr14                     63540851 618 -  81216349 I
e cavPor3.scaffold_95                5255370 1757 -   5884597 I
e hetGla2.JH602048                   9046640 927 -  42145720 I
e canFam3.chr13                     20335680 15 +  63241923 I
e pteVam1.scaffold_9062                51215 1943 +     66173 I
e tarSyr1.scaffold_52304               12306 1183 +     14295 I
e oviAri1.chr9                      68467306 2667 - 100831284 I
e felCat5.chrF2                     64500355 1160 +  82763536 I
e vicPac1.scaffold_13                1515842 2 +   2369290 I
e melGal1.chr3                      88078472 9551 + 100405168 I
e sarHar1.chr2_GL841388_random        481984 12896 +   1237177 I
e melUnd1.JH556481                    782640 58368 +   3508697 I
e turTru2.JH479543                     20044 2626 -    135452 I
e monDom5.chr3                     395438024 14746 + 527952102 I
e chrPic1.JH584538                    404458 7740 +   8176890 I
e galGal4.chr2                     136949488 65088 + 148809762 I

a score=41727.000000
s mm10.chr15                        56690706 10 + 104043685 TTCTGA---CTTG
s rn5.chr7                          97077719 10 + 143501887 TTTTGA---CTTG
i rn5.chr7                         C 0 C 0
s speTri2.JH393280                  21198493 10 -  46620681 TACTCA---TATT
i speTri2.JH393280                 C 0 C 0
s oryCun2.chr3                     137515519 10 + 155691105 TACCTG---CCTT
i oryCun2.chr3                     C 0 C 0
s hg19.chr8                        122648973 10 + 146364022 TACCTA---CATT
i hg19.chr8                        C 0 C 0
s panTro4.chr8                     120285997 10 + 143986469 TACCTA---CATT
i panTro4.chr8                     C 0 C 0
s ponAbe2.chr8                     129324015 10 + 153482349 TACCTA---CATT
i ponAbe2.chr8                     C 0 C 0
s nomLeu2.GL397267                  35741798 10 +  48819562 TACCTA---CATT
i nomLeu2.GL397267                 C 0 C 0
s rheMac3.chr8                     126563272 10 + 150158102 TACCTA---CATT
i rheMac3.chr8                     C 0 C 0
s papHam1.scaffold1185                 76527 10 +    226188 TACCTA---CATT
i papHam1.scaffold1185             C 0 C 0
s calJac3.chr16                     23626698 10 -  96796970 AACCTA---CCTT
i calJac3.chr16                    C 0 C 0
s saiBol1.JH378158                   9048750 10 -  16265076 AACCTA---CATT
i saiBol1.JH378158                 C 0 C 0
s micMur1.scaffold_4913                88699 13 +    135929 TAACCACATCATT
i micMur1.scaffold_4913            C 0 C 0
s otoGar3.GL873523                  39379011 10 -  47749213 CAACTA---CATT
i otoGar3.GL873523                 C 0 C 0
s tupBel1.scaffold_119809.1-330533     16034 10 +    330533 TACCTA---CAAT
i tupBel1.scaffold_119809.1-330533 C 0 C 0
s vicPac1.scaffold_13                1515844  9 +   2369290 -TTCCA---CATG
i vicPac1.scaffold_13              I 2 I 787
s canFam3.chr13                     20335695  9 +  63241923 -TCCTC---CACT
i canFam3.chr13                    I 15 I 1
s ailMel1.GL193711.1                  154444  9 -    529242 -TCCTC---CATT
i ailMel1.GL193711.1               I 15 I 1
s myoLuc2.GL429784                   8891835  9 +  14577598 -TCCTC---CATT
i myoLuc2.GL429784                 I 8 I 1
s loxAfr3.scaffold_8                67682572 10 +  85640724 GTCCTA---TATG
i loxAfr3.scaffold_8               C 0 C 0
s proCap1.scaffold_5125                51161 10 +     62060 GTTTTA---TATG
i proCap1.scaffold_5125            C 0 C 0
s dasNov3.JH579962                   3295038 10 +   3334091 TTTTTT---TAAA
i dasNov3.JH579962                 C 0 C 0
s choHof1.scaffold_1338                23158 10 +     46317 GTTTTA---TATG
i choHof1.scaffold_1338            C 0 C 0
e susScr3.chr4                      18484427 868 + 143465943 I
e ochPri2.scaffold_3008                37098 2113 +    168654 I
e sorAra1.scaffold_245118              29209 7774 +     38740 I
e echTel1.scaffold_246123               4312 4388 -     12816 I
e gorGor3.chr8                     121284328 8675 + 145327772 T
e triMan1.JH594628                   9782068 1054 +  24477914 I
e equCab2.chr9                      64365103 646 +  83561422 I
e bosTau7.chr14                     63540851 618 -  81216349 I
e cavPor3.scaffold_95                5255370 1757 -   5884597 I
e hetGla2.JH602048                   9046640 927 -  42145720 I
e pteVam1.scaffold_9062                51215 1943 +     66173 I
e tarSyr1.scaffold_52304               12306 1183 +     14295 I
e oviAri1.chr9                      68467306 2667 - 100831284 I
e felCat5.chrF2                     64500355 1160 +  82763536 I
e melGal1.chr3                      88078472 9551 + 100405168 I
e sarHar1.chr2_GL841388_random        481984 12896 +   1237177 I
e melUnd1.JH556481                    782640 58368 +   3508697 I
e turTru2.JH479543                     20044 2626 -    135452 I
e monDom5.chr3                     395438024 14746 + 527952102 I
e chrPic1.JH584538                    404458 7740 +   8176890 I
e galGal4.chr2                     136949488 65088 + 148809762 I

a score=-8812.000000
s mm10.chr15                        56690716 2 + 104043685 GG
s rn5.chr7                          97077729 2 + 143501887 GG
i rn5.chr7                         C 0 C 0
s speTri2.JH393280                  21198503 2 -  46620681 GA
i speTri2.JH393280                 C 0 I 2
s oryCun2.chr3                     137515529 2 + 155691105 GG
i oryCun2.chr3                     C 0 I 2
s hg19.chr8                        122648983 2 + 146364022 GG
i hg19.chr8                        C 0 I 2
s panTro4.chr8                     120286007 2 + 143986469 GG
i panTro4.chr8                     C 0 I 2
s ponAbe2.chr8                     129324025 2 + 153482349 GG
i ponAbe2.chr8                     C 0 I 2
s nomLeu2.GL397267                  35741808 2 +  48819562 GG
i nomLeu2.GL397267                 C 0 I 2
s rheMac3.chr8                     126563282 2 + 150158102 GG
i rheMac3.chr8                     C 0 I 2
s papHam1.scaffold1185                 76537 2 +    226188 GG
i papHam1.scaffold1185             C 0 I 2
s calJac3.chr16                     23626708 2 -  96796970 GG
i calJac3.chr16                    C 0 I 2
s saiBol1.JH378158                   9048760 2 -  16265076 GG
i saiBol1.JH378158                 C 0 I 2
s micMur1.scaffold_4913                88712 2 +    135929 GG
i micMur1.scaffold_4913            C 0 I 2
s otoGar3.GL873523                  39379021 2 -  47749213 GG
i otoGar3.GL873523                 C 0 I 2
s tupBel1.scaffold_119809.1-330533     16044 2 +    330533 GG
i tupBel1.scaffold_119809.1-330533 C 0 I 2
s canFam3.chr13                     20335705 1 +  63241923 -G
i canFam3.chr13                    I 1 I 2
s ailMel1.GL193711.1                  154454 1 -    529242 -G
i ailMel1.GL193711.1               I 1 I 2
s myoLuc2.GL429784                   8891845 1 +  14577598 -G
i myoLuc2.GL429784                 I 1 I 2
s loxAfr3.scaffold_8                67682583 1 +  85640724 A-
i loxAfr3.scaffold_8               C 0 I 12
s proCap1.scaffold_5125                51172 1 +     62060 G-
i proCap1.scaffold_5125            C 0 I 1667
s dasNov3.JH579962                   3295049 1 +   3334091 A-
i dasNov3.JH579962                 C 0 I 12
s choHof1.scaffold_1338                23169 1 +     46317 A-
i choHof1.scaffold_1338            C 0 I 12
e susScr3.chr4                      18484427 868 + 143465943 I
e ochPri2.scaffold_3008                37098 2113 +    168654 I
e sorAra1.scaffold_245118              29209 7774 +     38740 I
e echTel1.scaffold_246123               4312 4388 -     12816 I
e gorGor3.chr8                     121284328 8675 + 145327772 T
e triMan1.JH594628                   9782068 1054 +  24477914 I
e equCab2.chr9                      64365103 646 +  83561422 I
e bosTau7.chr14                     63540851 618 -  81216349 I
e cavPor3.scaffold_95                5255370 1757 -   5884597 I
e hetGla2.JH602048                   9046640 927 -  42145720 I
e pteVam1.scaffold_9062                51215 1943 +     66173 I
e tarSyr1.scaffold_52304               12306 1183 +     14295 I
e oviAri1.chr9                      68467306 2667 - 100831284 I
e felCat5.chrF2                     64500355 1160 +  82763536 I
e vicPac1.scaffold_13                1515853 787 +   2369290 I
e melGal1.chr3                      88078472 9551 + 100405168 I
e sarHar1.chr2_GL841388_random        481984 12896 +   1237177 I
e melUnd1.JH556481                    782640 58368 +   3508697 I
e turTru2.JH479543                     20044 2626 -    135452 I
e monDom5.chr3                     395438024 14746 + 527952102 I
e chrPic1.JH584538                    404458 7740 +   8176890 I
e galGal4.chr2                     136949488 65088 + 148809762 I

a score=107618.000000
s mm10.chr15                        56690718 11 + 104043685 TTTAGGAACTT
s rn5.chr7                          97077731 11 + 143501887 CTTAGAAACCT
i rn5.chr7                         C 0 C 0
s speTri2.JH393280                  21198507 11 -  46620681 CTTGAGAACTA
i speTri2.JH393280                 I 2 C 0
s oryCun2.chr3                     137515533 11 + 155691105 CTTGGGAACTG
i oryCun2.chr3                     I 2 C 0
s hg19.chr8                        122648987 11 + 146364022 CCTGGGAATTA
i hg19.chr8                        I 2 C 0
s panTro4.chr8                     120286011 11 + 143986469 CCTGGGAATTA
i panTro4.chr8                     I 2 C 0
s ponAbe2.chr8                     129324029 11 + 153482349 CCTGGGAATCA
i ponAbe2.chr8                     I 2 C 0
s nomLeu2.GL397267                  35741812 11 +  48819562 CCTGGGAATTA
i nomLeu2.GL397267                 I 2 C 0
s rheMac3.chr8                     126563286 11 + 150158102 CCTGGGAATTA
i rheMac3.chr8                     I 2 C 0
s papHam1.scaffold1185                 76541 11 +    226188 CCTGGGAATTA
i papHam1.scaffold1185             I 2 C 0
s calJac3.chr16                     23626712 11 -  96796970 CCTGGGAATTA
i calJac3.chr16                    I 2 C 0
s saiBol1.JH378158                   9048764 11 -  16265076 CCTGGGAATTA
i saiBol1.JH378158                 I 2 C 0
s micMur1.scaffold_4913                88716 11 +    135929 CTTGGGAACTA
i micMur1.scaffold_4913            I 2 C 0
s otoGar3.GL873523                  39379025 11 -  47749213 CTTGGGAATGG
i otoGar3.GL873523                 I 2 C 0
s tupBel1.scaffold_119809.1-330533     16048 11 +    330533 CTTGGGAAATC
i tupBel1.scaffold_119809.1-330533 I 2 C 0
s canFam3.chr13                     20335708 11 +  63241923 CTTGGGCACTA
i canFam3.chr13                    I 2 C 0
s ailMel1.GL193711.1                  154457 11 -    529242 CTAGGGCACTA
i ailMel1.GL193711.1               I 2 C 0
s myoLuc2.GL429784                   8891848 11 +  14577598 CCTGGCCACTG
i myoLuc2.GL429784                 I 2 C 0
s loxAfr3.scaffold_8                67682596 11 +  85640724 CTTGAGCACTA
i loxAfr3.scaffold_8               I 12 C 0
s dasNov3.JH579962                   3295062 11 +   3334091 CTCAAGCACTT
i dasNov3.JH579962                 I 12 C 0
s choHof1.scaffold_1338                23182 11 +     46317 CTCGGGCACTC
i choHof1.scaffold_1338            I 12 C 0
e susScr3.chr4                      18484427 868 + 143465943 I
e ochPri2.scaffold_3008                37098 2113 +    168654 I
e sorAra1.scaffold_245118              29209 7774 +     38740 I
e echTel1.scaffold_246123               4312 4388 -     12816 I
e gorGor3.chr8                     121284328 8675 + 145327772 T
e triMan1.JH594628                   9782068 1054 +  24477914 I
e equCab2.chr9                      64365103 646 +  83561422 I
e bosTau7.chr14                     63540851 618 -  81216349 I
e cavPor3.scaffold_95                5255370 1757 -   5884597 I
e hetGla2.JH602048                   9046640 927 -  42145720 I
e pteVam1.scaffold_9062                51215 1943 +     66173 I
e tarSyr1.scaffold_52304               12306 1183 +     14295 I
e oviAri1.chr9                      68467306 2667 - 100831284 I
e felCat5.chrF2                     64500355 1160 +  82763536 I
e vicPac1.scaffold_13                1515853 787 +   2369290 I
e melGal1.chr3                      88078472 9551 + 100405168 I
e sarHar1.chr2_GL841388_random        481984 12896 +   1237177 I
e melUnd1.JH556481                    782640 58368 +   3508697 I
e turTru2.JH479543                     20044 2626 -    135452 I
e monDom5.chr3                     395438024 14746 + 527952102 I
e proCap1.scaffold_5125                51173 1667 +     62060 I
e chrPic1.JH584538                    404458 7740 +   8176890 I
e galGal4.chr2                     136949488 65088 + 148809762 I

a score=137516.000000
s mm10.chr15                        56690729 12 + 104043685 ACTCTTTAGGTT
s rn5.chr7                          97077742 12 + 143501887 ACTCTTTAGGTT
i rn5.chr7                         C 0 C 0
s speTri2.JH393280                  21198518 12 -  46620681 TCTTTGTAGGTC
i speTri2.JH393280                 C 0 C 0
s oryCun2.chr3                     137515544 12 + 155691105 TTTACAGAGGTC
i oryCun2.chr3                     C 0 C 0
s hg19.chr8                        122648998 12 + 146364022 TATCTATAGGTC
i hg19.chr8                        C 0 C 0
s panTro4.chr8                     120286022 12 + 143986469 TATCTATAGGTC
i panTro4.chr8                     C 0 C 0
s ponAbe2.chr8                     129324040 12 + 153482349 TATCTAAAGGTC
i ponAbe2.chr8                     C 0 C 0
s nomLeu2.GL397267                  35741823 12 +  48819562 TATCTATAGGTC
i nomLeu2.GL397267                 C 0 C 0
s rheMac3.chr8                     126563297 12 + 150158102 TATCTATAGGTC
i rheMac3.chr8                     C 0 C 0
s papHam1.scaffold1185                 76552 12 +    226188 TATCTATAGGTC
i papHam1.scaffold1185             C 0 C 0
s calJac3.chr16                     23626723 12 -  96796970 TCTCTATAGGTC
i calJac3.chr16                    C 0 C 0
s saiBol1.JH378158                   9048775 12 -  16265076 TCCCTATAGGTC
i saiBol1.JH378158                 C 0 C 0
s micMur1.scaffold_4913                88727 12 +    135929 ACTATGTAGGTC
i micMur1.scaffold_4913            C 0 C 0
s otoGar3.GL873523                  39379036 12 -  47749213 TCTCTCCAGGTC
i otoGar3.GL873523                 C 0 C 0
s tupBel1.scaffold_119809.1-330533     16059 12 +    330533 TCTCTAGAGATC
i tupBel1.scaffold_119809.1-330533 C 0 C 0
s canFam3.chr13                     20335719 12 +  63241923 TCTTTATAGGTC
i canFam3.chr13                    C 0 C 0
s ailMel1.GL193711.1                  154468 12 -    529242 TCTTCATAGGTC
i ailMel1.GL193711.1               C 0 C 0
s myoLuc2.GL429784                   8891859 12 +  14577598 TTTCTATAGAGC
i myoLuc2.GL429784                 C 0 C 0
s loxAfr3.scaffold_8                67682607 12 +  85640724 TCTCTATAGGTC
i loxAfr3.scaffold_8               C 0 C 0
s proCap1.scaffold_5125                52840 12 +     62060 ACCCTATGAGTT
i proCap1.scaffold_5125            I 1667 C 0
s dasNov3.JH579962                   3295073 12 +   3334091 TCTCTTTAAGTC
i dasNov3.JH579962                 C 0 C 0
s choHof1.scaffold_1338                23193 12 +     46317 TCTCTGTAGGTC
i choHof1.scaffold_1338            C 0 C 0
e susScr3.chr4                      18484427 868 + 143465943 I
e ochPri2.scaffold_3008                37098 2113 +    168654 I
e sorAra1.scaffold_245118              29209 7774 +     38740 I
e echTel1.scaffold_246123               4312 4388 -     12816 I
e gorGor3.chr8                     121284328 8675 + 145327772 T
e triMan1.JH594628                   9782068 1054 +  24477914 I
e equCab2.chr9                      64365103 646 +  83561422 I
e bosTau7.chr14                     63540851 618 -  81216349 I
e cavPor3.scaffold_95                5255370 1757 -   5884597 I
e hetGla2.JH602048                   9046640 927 -  42145720 I
e pteVam1.scaffold_9062                51215 1943 +     66173 I
e tarSyr1.scaffold_52304               12306 1183 +     14295 I
e oviAri1.chr9                      68467306 2667 - 100831284 I
e felCat5.chrF2                     64500355 1160 +  82763536 I
e vicPac1.scaffold_13                1515853 787 +   2369290 I
e melGal1.chr3                      88078472 9551 + 100405168 I
e sarHar1.chr2_GL841388_random        481984 12896 +   1237177 I
e melUnd1.JH556481                    782640 58368 +   3508697 I
e turTru2.JH479543                     20044 2626 -    135452 I
e monDom5.chr3                     395438024 14746 + 527952102 I
e chrPic1.JH584538                    404458 7740 +   8176890 I
e galGal4.chr2                     136949488 65088 + 148809762 I

a score=81897.000000
s mm10.chr15                        56690741 4 + 104043685 AAAA
s rn5.chr7                          97077754 4 + 143501887 AAAA
i rn5.chr7                         C 0 C 0
s speTri2.JH393280                  21198530 4 -  46620681 AAAA
i speTri2.JH393280                 C 0 C 0
s oryCun2.chr3                     137515556 4 + 155691105 AAAA
i oryCun2.chr3                     C 0 I 506
s hg19.chr8                        122649010 4 + 146364022 AAAA
i hg19.chr8                        C 0 C 0
s panTro4.chr8                     120286034 4 + 143986469 AAAA
i panTro4.chr8                     C 0 C 0
s ponAbe2.chr8                     129324052 4 + 153482349 AAAA
i ponAbe2.chr8                     C 0 C 0
s nomLeu2.GL397267                  35741835 4 +  48819562 AAAA
i nomLeu2.GL397267                 C 0 C 0
s rheMac3.chr8                     126563309 4 + 150158102 AAAA
i rheMac3.chr8                     C 0 C 0
s papHam1.scaffold1185                 76564 4 +    226188 AAAA
i papHam1.scaffold1185             C 0 C 0
s calJac3.chr16                     23626735 4 -  96796970 AAAA
i calJac3.chr16                    C 0 C 0
s saiBol1.JH378158                   9048787 4 -  16265076 AAAA
i saiBol1.JH378158                 C 0 C 0
s micMur1.scaffold_4913                88739 4 +    135929 AAAA
i micMur1.scaffold_4913            C 0 C 0
s otoGar3.GL873523                  39379048 4 -  47749213 AAAA
i otoGar3.GL873523                 C 0 C 0
s tupBel1.scaffold_119809.1-330533     16071 4 +    330533 AAAA
i tupBel1.scaffold_119809.1-330533 C 0 C 0
s canFam3.chr13                     20335731 4 +  63241923 AAAA
i canFam3.chr13                    C 0 I 5
s ailMel1.GL193711.1                  154480 4 -    529242 AGAA
i ailMel1.GL193711.1               C 0 I 1013
s equCab2.chr9                      64365749 2 +  83561422 --AA
i equCab2.chr9                     I 646 I 9
s myoLuc2.GL429784                   8891871 4 +  14577598 AAAA
i myoLuc2.GL429784                 C 0 I 5
s loxAfr3.scaffold_8                67682619 4 +  85640724 AAAA
i loxAfr3.scaffold_8               C 0 C 0
s proCap1.scaffold_5125                52852 4 +     62060 AGAA
i proCap1.scaffold_5125            C 0 C 0
s dasNov3.JH579962                   3295085 4 +   3334091 AAAA
i dasNov3.JH579962                 C 0 I 678
s choHof1.scaffold_1338                23205 4 +     46317 AAAA
i choHof1.scaffold_1338            C 0 C 0
e susScr3.chr4                      18484427 868 + 143465943 I
e ochPri2.scaffold_3008                37098 2113 +    168654 I
e sorAra1.scaffold_245118              29209 7774 +     38740 I
e echTel1.scaffold_246123               4312 4388 -     12816 I
e gorGor3.chr8                     121284328 8675 + 145327772 T
e triMan1.JH594628                   9782068 1054 +  24477914 I
e bosTau7.chr14                     63540851 618 -  81216349 I
e cavPor3.scaffold_95                5255370 1757 -   5884597 I
e hetGla2.JH602048                   9046640 927 -  42145720 I
e pteVam1.scaffold_9062                51215 1943 +     66173 I
e tarSyr1.scaffold_52304               12306 1183 +     14295 I
e oviAri1.chr9                      68467306 2667 - 100831284 I
e felCat5.chrF2                     64500355 1160 +  82763536 I
e vicPac1.scaffold_13                1515853 787 +   2369290 I
e melGal1.chr3                      88078472 9551 + 100405168 I
e sarHar1.chr2_GL841388_random        481984 12896 +   1237177 I
e melUnd1.JH556481                    782640 58368 +   3508697 I
e turTru2.JH479543                     20044 2626 -    135452 I
e monDom5.chr3                     395438024 14746 + 527952102 I
e chrPic1.JH584538                    404458 7740 +   8176890 I
e galGal4.chr2                     136949488 65088 + 148809762 I

a score=3366.000000
s mm10.chr15                        56690745 3 + 104043685 TGT
s rn5.chr7                          97077758 3 + 143501887 TGT
i rn5.chr7                         C 0 C 0
s speTri2.JH393280                  21198534 3 -  46620681 TCA
i speTri2.JH393280                 C 0 C 0
s hg19.chr8                        122649014 3 + 146364022 CCC
i hg19.chr8                        C 0 C 0
s panTro4.chr8                     120286038 3 + 143986469 CCC
i panTro4.chr8                     C 0 C 0
s ponAbe2.chr8                     129324056 3 + 153482349 CCC
i ponAbe2.chr8                     C 0 C 0
s nomLeu2.GL397267                  35741839 3 +  48819562 CCC
i nomLeu2.GL397267                 C 0 C 0
s rheMac3.chr8                     126563313 3 + 150158102 CCC
i rheMac3.chr8                     C 0 C 0
s papHam1.scaffold1185                 76568 3 +    226188 CCC
i papHam1.scaffold1185             C 0 C 0
s calJac3.chr16                     23626739 3 -  96796970 CCC
i calJac3.chr16                    C 0 C 0
s saiBol1.JH378158                   9048791 3 -  16265076 CCC
i saiBol1.JH378158                 C 0 C 0
s micMur1.scaffold_4913                88743 3 +    135929 CCC
i micMur1.scaffold_4913            C 0 C 0
s otoGar3.GL873523                  39379052 3 -  47749213 CTC
i otoGar3.GL873523                 C 0 C 0
s tupBel1.scaffold_119809.1-330533     16075 3 +    330533 TCA
i tupBel1.scaffold_119809.1-330533 C 0 C 0
s canFam3.chr13                     20335740 3 +  63241923 TGT
i canFam3.chr13                    I 5 I 3
s equCab2.chr9                      64365760 3 +  83561422 TGT
i equCab2.chr9                     I 9 I 8
s myoLuc2.GL429784                   8891880 3 +  14577598 TGT
i myoLuc2.GL429784                 I 5 I 3
s loxAfr3.scaffold_8                67682623 3 +  85640724 CCT
i loxAfr3.scaffold_8               C 0 C 0
s choHof1.scaffold_1338                23209 3 +     46317 TCG
i choHof1.scaffold_1338            C 0 C 0
e susScr3.chr4                      18484427 868 + 143465943 I
e ochPri2.scaffold_3008                37098 2113 +    168654 I
e sorAra1.scaffold_245118              29209 7774 +     38740 I
e echTel1.scaffold_246123               4312 4388 -     12816 I
e oryCun2.chr3                     137515560 506 + 155691105 I
e ailMel1.GL193711.1                  154484 1013 -    529242 I
e gorGor3.chr8                     121284328 8675 + 145327772 T
e triMan1.JH594628                   9782068 1054 +  24477914 I
e bosTau7.chr14                     63540851 618 -  81216349 I
e cavPor3.scaffold_95                5255370 1757 -   5884597 I
e hetGla2.JH602048                   9046640 927 -  42145720 I
e pteVam1.scaffold_9062                51215 1943 +     66173 I
e tarSyr1.scaffold_52304               12306 1183 +     14295 I
e oviAri1.chr9                      68467306 2667 - 100831284 I
e felCat5.chrF2                     64500355 1160 +  82763536 I
e dasNov3.JH579962                   3295089 678 +   3334091 I
e vicPac1.scaffold_13                1515853 787 +   2369290 I
e melGal1.chr3                      88078472 9551 + 100405168 I
e sarHar1.chr2_GL841388_random        481984 12896 +   1237177 I
e melUnd1.JH556481                    782640 58368 +   3508697 I
e turTru2.JH479543                     20044 2626 -    135452 I
e monDom5.chr3                     395438024 14746 + 527952102 I
e proCap1.scaffold_5125                52856 0 +     62060 C
e chrPic1.JH584538                    404458 7740 +   8176890 I
e galGal4.chr2                     136949488 65088 + 148809762 I

a score=30244.000000
s mm10.chr15                        56690748 2 + 104043685 TA
s rn5.chr7                          97077761 2 + 143501887 TA
i rn5.chr7                         C 0 C 0
s speTri2.JH393280                  21198537 2 -  46620681 TG
i speTri2.JH393280                 C 0 C 0
s hg19.chr8                        122649017 2 + 146364022 TA
i hg19.chr8                        C 0 C 0
s panTro4.chr8                     120286041 2 + 143986469 TA
i panTro4.chr8                     C 0 C 0
s ponAbe2.chr8                     129324059 2 + 153482349 TA
i ponAbe2.chr8                     C 0 C 0
s nomLeu2.GL397267                  35741842 2 +  48819562 TA
i nomLeu2.GL397267                 C 0 C 0
s rheMac3.chr8                     126563316 2 + 150158102 TA
i rheMac3.chr8                     C 0 C 0
s papHam1.scaffold1185                 76571 2 +    226188 TA
i papHam1.scaffold1185             C 0 C 0
s calJac3.chr16                     23626742 2 -  96796970 TA
i calJac3.chr16                    C 0 C 0
s saiBol1.JH378158                   9048794 2 -  16265076 TA
i saiBol1.JH378158                 C 0 C 0
s micMur1.scaffold_4913                88746 2 +    135929 TA
i micMur1.scaffold_4913            C 0 C 0
s otoGar3.GL873523                  39379055 2 -  47749213 TG
i otoGar3.GL873523                 C 0 C 0
s tupBel1.scaffold_119809.1-330533     16078 2 +    330533 TA
i tupBel1.scaffold_119809.1-330533 C 0 C 0
s oviAri1.chr9                      68469973 2 - 100831284 TA
i oviAri1.chr9                     I 2667 C 0
s bosTau7.chr14                     63541469 2 -  81216349 TA
i bosTau7.chr14                    I 618 C 0
s canFam3.chr13                     20335746 2 +  63241923 CA
i canFam3.chr13                    I 3 C 0
s equCab2.chr9                      64365771 2 +  83561422 CA
i equCab2.chr9                     I 8 C 0
s myoLuc2.GL429784                   8891886 2 +  14577598 CA
i myoLuc2.GL429784                 I 3 C 0
s loxAfr3.scaffold_8                67682626 2 +  85640724 TA
i loxAfr3.scaffold_8               C 0 I 1131
s proCap1.scaffold_5125                52856 2 +     62060 TA
i proCap1.scaffold_5125            C 0 I 7
s choHof1.scaffold_1338                23212 2 +     46317 TA
i choHof1.scaffold_1338            C 0 I 2
e susScr3.chr4                      18484427 868 + 143465943 I
e ochPri2.scaffold_3008                37098 2113 +    168654 I
e sorAra1.scaffold_245118              29209 7774 +     38740 I
e echTel1.scaffold_246123               4312 4388 -     12816 I
e oryCun2.chr3                     137515560 506 + 155691105 I
e ailMel1.GL193711.1                  154484 1013 -    529242 I
e gorGor3.chr8                     121284328 8675 + 145327772 T
e triMan1.JH594628                   9782068 1054 +  24477914 I
e cavPor3.scaffold_95                5255370 1757 -   5884597 I
e hetGla2.JH602048                   9046640 927 -  42145720 I
e pteVam1.scaffold_9062                51215 1943 +     66173 I
e tarSyr1.scaffold_52304               12306 1183 +     14295 I
e felCat5.chrF2                     64500355 1160 +  82763536 I
e dasNov3.JH579962                   3295089 678 +   3334091 I
e vicPac1.scaffold_13                1515853 787 +   2369290 I
e melGal1.chr3                      88078472 9551 + 100405168 I
e sarHar1.chr2_GL841388_random        481984 12896 +   1237177 I
e melUnd1.JH556481                    782640 58368 +   3508697 I
e turTru2.JH479543                     20044 2626 -    135452 I
e monDom5.chr3                     395438024 14746 + 527952102 I
e chrPic1.JH584538                    404458 7740 +   8176890 I
e galGal4.chr2                     136949488 65088 + 148809762 I

a score=-77018.000000
s mm10.chr15                        56690750 4 + 104043685 C---ACG
s rn5.chr7                          97077763 4 + 143501887 C---ACA
i rn5.chr7                         C 0 C 0
s speTri2.JH393280                  21198539 4 -  46620681 G---ACA
i speTri2.JH393280                 C 0 C 0
s hg19.chr8                        122649019 4 + 146364022 C---CTA
i hg19.chr8                        C 0 I 4
s panTro4.chr8                     120286043 4 + 143986469 C---CTA
i panTro4.chr8                     C 0 I 4
s ponAbe2.chr8                     129324061 4 + 153482349 C---CTA
i ponAbe2.chr8                     C 0 I 4
s nomLeu2.GL397267                  35741844 4 +  48819562 C---CCA
i nomLeu2.GL397267                 C 0 I 4
s rheMac3.chr8                     126563318 4 + 150158102 C---TTA
i rheMac3.chr8                     C 0 I 4
s papHam1.scaffold1185                 76573 4 +    226188 C---TTA
i papHam1.scaffold1185             C 0 I 4
s calJac3.chr16                     23626744 4 -  96796970 T---CTA
i calJac3.chr16                    C 0 I 4
s saiBol1.JH378158                   9048796 4 -  16265076 T---CTA
i saiBol1.JH378158                 C 0 I 4
s micMur1.scaffold_4913                88748 3 +    135929 T---GT-
i micMur1.scaffold_4913            C 0 I 1
s otoGar3.GL873523                  39379057 3 -  47749213 T---GT-
i otoGar3.GL873523                 C 0 I 1
s tupBel1.scaffold_119809.1-330533     16080 3 +    330533 T---GT-
i tupBel1.scaffold_119809.1-330533 C 0 I 1
s oviAri1.chr9                      68469975 4 - 100831284 TATT---
i oviAri1.chr9                     C 0 C 0
s bosTau7.chr14                     63541471 4 -  81216349 TATT---
i bosTau7.chr14                    C 0 C 0
s canFam3.chr13                     20335748 1 +  63241923 T------
i canFam3.chr13                    C 0 C 0
s equCab2.chr9                      64365773 1 +  83561422 C------
i equCab2.chr9                     C 0 C 0
s myoLuc2.GL429784                   8891888 1 +  14577598 C------
i myoLuc2.GL429784                 C 0 C 0
s proCap1.scaffold_5125                52865 2 +     62060 -----CA
i proCap1.scaffold_5125            I 7 I 7
s choHof1.scaffold_1338                23216 2 +     46317 -----TA
i choHof1.scaffold_1338            I 2 I 11
e susScr3.chr4                      18484427 868 + 143465943 I
e ochPri2.scaffold_3008                37098 2113 +    168654 I
e sorAra1.scaffold_245118              29209 7774 +     38740 I
e echTel1.scaffold_246123               4312 4388 -     12816 I
e oryCun2.chr3                     137515560 506 + 155691105 I
e ailMel1.GL193711.1                  154484 1013 -    529242 I
e gorGor3.chr8                     121284328 8675 + 145327772 T
e triMan1.JH594628                   9782068 1054 +  24477914 I
e loxAfr3.scaffold_8                67682628 1131 +  85640724 I
e cavPor3.scaffold_95                5255370 1757 -   5884597 I
e hetGla2.JH602048                   9046640 927 -  42145720 I
e pteVam1.scaffold_9062                51215 1943 +     66173 I
e tarSyr1.scaffold_52304               12306 1183 +     14295 I
e felCat5.chrF2                     64500355 1160 +  82763536 I
e dasNov3.JH579962                   3295089 678 +   3334091 I
e vicPac1.scaffold_13                1515853 787 +   2369290 I
e melGal1.chr3                      88078472 9551 + 100405168 I
e sarHar1.chr2_GL841388_random        481984 12896 +   1237177 I
e melUnd1.JH556481                    782640 58368 +   3508697 I
e turTru2.JH479543                     20044 2626 -    135452 I
e monDom5.chr3                     395438024 14746 + 527952102 I
e chrPic1.JH584538                    404458 7740 +   8176890 I
e galGal4.chr2                     136949488 65088 + 148809762 I

a score=29388.000000
s mm10.chr15                        56690754 10 + 104043685 ATAAA------------CTGCA
s rn5.chr7                          97077767 10 + 143501887 ATAAA------------GTGCA
i rn5.chr7                         C 0 I 1
s hetGla2.JH602048                   9047567 10 -  42145720 atata------------ttcta
i hetGla2.JH602048                 I 927 C 0
s speTri2.JH393280                  21198543 10 -  46620681 GTAAA------------AGGCA
i speTri2.JH393280                 C 0 I 1
s hg19.chr8                        122649027 10 + 146364022 GCCAA------------ATGTA
i hg19.chr8                        I 4 I 1
s panTro4.chr8                     120286051 10 + 143986469 GCCAA------------ATGTA
i panTro4.chr8                     I 4 I 1
s ponAbe2.chr8                     129324069 10 + 153482349 GCCAA------------ATGTA
i ponAbe2.chr8                     I 4 I 1
s nomLeu2.GL397267                  35741852 10 +  48819562 ACCAA------------ATGTA
i nomLeu2.GL397267                 I 4 I 1
s rheMac3.chr8                     126563326 10 + 150158102 GCCAA------------ATGTA
i rheMac3.chr8                     I 4 I 1
s papHam1.scaffold1185                 76581 10 +    226188 GCCAA------------ATGTA
i papHam1.scaffold1185             I 4 I 1
s calJac3.chr16                     23626752 10 -  96796970 GTTAA------------ATGTA
i calJac3.chr16                    I 4 I 1
s saiBol1.JH378158                   9048804 10 -  16265076 GTCAA------------ATGTA
i saiBol1.JH378158                 I 4 I 1
s micMur1.scaffold_4913                88752 10 +    135929 GCCAC------------ATGTA
i micMur1.scaffold_4913            I 1 I 1
s otoGar3.GL873523                  39379061 10 -  47749213 GTCAC------------ATGTA
i otoGar3.GL873523                 I 1 I 1
s tupBel1.scaffold_119809.1-330533     16084 10 +    330533 GCCAA------------TTGTA
i tupBel1.scaffold_119809.1-330533 I 1 I 1
s vicPac1.scaffold_13                1516640  5 +   2369290 -----------------ATGAA
i vicPac1.scaffold_13              I 787 I 5
s oviAri1.chr9                      68469979  5 - 100831284 -----------------ATGAA
i oviAri1.chr9                     C 0 I 5
s bosTau7.chr14                     63541475  5 -  81216349 -----------------ATGAA
i bosTau7.chr14                    C 0 I 5
s canFam3.chr13                     20335749  5 +  63241923 -----------------ATGCA
i canFam3.chr13                    C 0 I 4
s equCab2.chr9                      64365774  5 +  83561422 -----------------ATAGA
i equCab2.chr9                     C 0 I 9
s myoLuc2.GL429784                   8891889  5 +  14577598 -----------------AAGTG
i myoLuc2.GL429784                 C 0 I 4
s sorAra1.scaffold_245118              36983  5 +     38740 -----------------ATGAA
i sorAra1.scaffold_245118          I 7774 I 9
s loxAfr3.scaffold_8                67683759 10 +  85640724 ACAAA------------TTCCA
i loxAfr3.scaffold_8               I 1131 C 0
s proCap1.scaffold_5125                52874 22 +     62060 ACAAATGTATGCCCAATTTCCA
i proCap1.scaffold_5125            I 7 C 0
s triMan1.JH594628                   9783122 10 +  24477914 ACGAA------------TTCCA
i triMan1.JH594628                 I 1054 C 0
s choHof1.scaffold_1338                23229 10 +     46317 CCAAA------------TGCCA
i choHof1.scaffold_1338            I 11 C 0
e susScr3.chr4                      18484427 868 + 143465943 I
e ochPri2.scaffold_3008                37098 2113 +    168654 I
e echTel1.scaffold_246123               4312 4388 -     12816 I
e oryCun2.chr3                     137515560 506 + 155691105 I
e ailMel1.GL193711.1                  154484 1013 -    529242 I
e gorGor3.chr8                     121284328 8675 + 145327772 T
e cavPor3.scaffold_95                5255370 1757 -   5884597 I
e pteVam1.scaffold_9062                51215 1943 +     66173 I
e tarSyr1.scaffold_52304               12306 1183 +     14295 I
e felCat5.chrF2                     64500355 1160 +  82763536 I
e dasNov3.JH579962                   3295089 678 +   3334091 I
e melGal1.chr3                      88078472 9551 + 100405168 I
e sarHar1.chr2_GL841388_random        481984 12896 +   1237177 I
e melUnd1.JH556481                    782640 58368 +   3508697 I
e turTru2.JH479543                     20044 2626 -    135452 I
e monDom5.chr3                     395438024 14746 + 527952102 I
e chrPic1.JH584538                    404458 7740 +   8176890 I
e galGal4.chr2                     136949488 65088 + 148809762 I

a score=78901.000000
s mm10.chr15                        56690764 10 + 104043685 CACAAATGTC
s rn5.chr7                          97077778 10 + 143501887 CACAAACGGC
i rn5.chr7                         I 1 C 0
s hetGla2.JH602048                   9047577 10 -  42145720 catacatata
i hetGla2.JH602048                 C 0 C 0
s speTri2.JH393280                  21198554 10 -  46620681 CACAAATGCC
i speTri2.JH393280                 I 1 C 0
s hg19.chr8                        122649038 10 + 146364022 CACAAACGCC
i hg19.chr8                        I 1 C 0
s panTro4.chr8                     120286062 10 + 143986469 CACAAACGCC
i panTro4.chr8                     I 1 C 0
s ponAbe2.chr8                     129324080 10 + 153482349 CACAAATGCC
i ponAbe2.chr8                     I 1 C 0
s nomLeu2.GL397267                  35741863 10 +  48819562 CACAAATGCC
i nomLeu2.GL397267                 I 1 C 0
s rheMac3.chr8                     126563337 10 + 150158102 CACAAATGCC
i rheMac3.chr8                     I 1 C 0
s papHam1.scaffold1185                 76592 10 +    226188 CACAAATGCC
i papHam1.scaffold1185             I 1 C 0
s calJac3.chr16                     23626763 10 -  96796970 CACGAATGCC
i calJac3.chr16                    I 1 C 0
s saiBol1.JH378158                   9048815 10 -  16265076 CACAAGTGCC
i saiBol1.JH378158                 I 1 C 0
s micMur1.scaffold_4913                88763 10 +    135929 CACAAATGAC
i micMur1.scaffold_4913            I 1 C 0
s otoGar3.GL873523                  39379072 10 -  47749213 CACAAAGGCC
i otoGar3.GL873523                 I 1 C 0
s tupBel1.scaffold_119809.1-330533     16095 10 +    330533 TACAAATATC
i tupBel1.scaffold_119809.1-330533 I 1 I 2070
s susScr3.chr4                      18485295 10 + 143465943 CACAGATGAC
i susScr3.chr4                     I 868 I 4
s vicPac1.scaffold_13                1516650 10 +   2369290 CATAGATGAC
i vicPac1.scaffold_13              I 5 I 5
s oviAri1.chr9                      68469989 10 - 100831284 CATAGATAAC
i oviAri1.chr9                     I 5 I 5
s bosTau7.chr14                     63541485 10 -  81216349 CATAGATAAC
i bosTau7.chr14                    I 5 I 5
s canFam3.chr13                     20335758  2 +  63241923 --------AA
i canFam3.chr13                    I 4 I 5
s myoLuc2.GL429784                   8891898  2 +  14577598 --------AA
i myoLuc2.GL429784                 I 4 I 5
s loxAfr3.scaffold_8                67683769 10 +  85640724 AATAGATGGC
i loxAfr3.scaffold_8               C 0 C 0
s proCap1.scaffold_5125                52896 10 +     62060 AATAGACGGA
i proCap1.scaffold_5125            C 0 C 0
s triMan1.JH594628                   9783132 10 +  24477914 AATAGATGGC
i triMan1.JH594628                 C 0 C 0
s choHof1.scaffold_1338                23239  5 +     46317 AA-----ACC
i choHof1.scaffold_1338            C 0 C 0
e ochPri2.scaffold_3008                37098 2113 +    168654 I
e sorAra1.scaffold_245118              36988  9 +     38740 I
e echTel1.scaffold_246123               4312 4388 -     12816 I
e oryCun2.chr3                     137515560 506 + 155691105 I
e ailMel1.GL193711.1                  154484 1013 -    529242 I
e gorGor3.chr8                     121284328 8675 + 145327772 T
e equCab2.chr9                      64365779  9 +  83561422 I
e cavPor3.scaffold_95                5255370 1757 -   5884597 I
e pteVam1.scaffold_9062                51215 1943 +     66173 I
e tarSyr1.scaffold_52304               12306 1183 +     14295 I
e felCat5.chrF2                     64500355 1160 +  82763536 I
e dasNov3.JH579962                   3295089 678 +   3334091 I
e melGal1.chr3                      88078472 9551 + 100405168 I
e sarHar1.chr2_GL841388_random        481984 12896 +   1237177 I
e melUnd1.JH556481                    782640 58368 +   3508697 I
e turTru2.JH479543                     20044 2626 -    135452 I
e monDom5.chr3                     395438024 14746 + 527952102 I
e chrPic1.JH584538                    404458 7740 +   8176890 I
e galGal4.chr2                     136949488 65088 + 148809762 I

a score=-18877.000000
s mm10.chr15                        56690774 7 + 104043685 CAGGCTC
s rn5.chr7                          97077788 7 + 143501887 CAGACTC
i rn5.chr7                         C 0 C 0
s hetGla2.JH602048                   9047587 7 -  42145720 catTCTT
i hetGla2.JH602048                 C 0 C 0
s speTri2.JH393280                  21198564 7 -  46620681 AAGTCTC
i speTri2.JH393280                 C 0 C 0
s hg19.chr8                        122649048 7 + 146364022 AAGTCTC
i hg19.chr8                        C 0 I 872
s panTro4.chr8                     120286072 7 + 143986469 AAGTCTC
i panTro4.chr8                     C 0 I 878
s ponAbe2.chr8                     129324090 7 + 153482349 AAGTCTC
i ponAbe2.chr8                     C 0 I 879
s nomLeu2.GL397267                  35741873 7 +  48819562 AAGTCTC
i nomLeu2.GL397267                 C 0 C 0
s rheMac3.chr8                     126563347 7 + 150158102 AAGTCTC
i rheMac3.chr8                     C 0 C 0
s papHam1.scaffold1185                 76602 7 +    226188 AAGTCTC
i papHam1.scaffold1185             C 0 C 0
s calJac3.chr16                     23626773 7 -  96796970 AAGTCTC
i calJac3.chr16                    C 0 C 0
s saiBol1.JH378158                   9048825 7 -  16265076 AAGTCTC
i saiBol1.JH378158                 C 0 C 0
s micMur1.scaffold_4913                88773 7 +    135929 AAGTCTC
i micMur1.scaffold_4913            C 0 I 2
s otoGar3.GL873523                  39379082 7 -  47749213 AAATCTC
i otoGar3.GL873523                 C 0 I 530
s susScr3.chr4                      18485309 6 + 143465943 AAGTAT-
i susScr3.chr4                     I 4 C 0
s vicPac1.scaffold_13                1516665 6 +   2369290 AAATAT-
i vicPac1.scaffold_13              I 5 C 0
s oviAri1.chr9                      68470004 6 - 100831284 AAATAT-
i oviAri1.chr9                     I 5 C 0
s bosTau7.chr14                     63541500 6 -  81216349 AAATAT-
i bosTau7.chr14                    I 5 C 0
s canFam3.chr13                     20335765 6 +  63241923 AAGTCT-
i canFam3.chr13                    I 5 C 0
s equCab2.chr9                      64365788 6 +  83561422 AAACAT-
i equCab2.chr9                     I 9 C 0
s myoLuc2.GL429784                   8891905 6 +  14577598 AAGCCT-
i myoLuc2.GL429784                 I 5 C 0
s sorAra1.scaffold_245118              36997 6 +     38740 AAATAG-
i sorAra1.scaffold_245118          I 9 C 0
s loxAfr3.scaffold_8                67683779 3 +  85640724 -ATT---
i loxAfr3.scaffold_8               C 0 C 0
s proCap1.scaffold_5125                52906 3 +     62060 -ATT---
i proCap1.scaffold_5125            C 0 C 0
s triMan1.JH594628                   9783142 4 +  24477914 AATT---
i triMan1.JH594628                 C 0 C 0
s choHof1.scaffold_1338                23244 3 +     46317 -CTT---
i choHof1.scaffold_1338            C 0 C 0
e ochPri2.scaffold_3008                37098 2113 +    168654 I
e echTel1.scaffold_246123               4312 4388 -     12816 I
e oryCun2.chr3                     137515560 506 + 155691105 I
e ailMel1.GL193711.1                  154484 1013 -    529242 I
e gorGor3.chr8                     121284328 8675 + 145327772 T
e cavPor3.scaffold_95                5255370 1757 -   5884597 I
e pteVam1.scaffold_9062                51215 1943 +     66173 I
e tarSyr1.scaffold_52304               12306 1183 +     14295 I
e felCat5.chrF2                     64500355 1160 +  82763536 I
e dasNov3.JH579962                   3295089 678 +   3334091 I
e melGal1.chr3                      88078472 9551 + 100405168 I
e sarHar1.chr2_GL841388_random        481984 12896 +   1237177 I
e melUnd1.JH556481                    782640 58368 +   3508697 I
e turTru2.JH479543                     20044 2626 -    135452 I
e monDom5.chr3                     395438024 14746 + 527952102 I
e chrPic1.JH584538                    404458 7740 +   8176890 I
e tupBel1.scaffold_119809.1-330533     16105 2070 +    330533 I
e galGal4.chr2                     136949488 65088 + 148809762 I

a score=3125.000000
s mm10.chr15                        56690781 1 + 104043685 C
s rn5.chr7                          97077795 1 + 143501887 T
i rn5.chr7                         C 0 C 0
s speTri2.JH393280                  21198571 1 -  46620681 T
i speTri2.JH393280                 C 0 C 0
s nomLeu2.GL397267                  35741880 1 +  48819562 T
i nomLeu2.GL397267                 C 0 I 1
s rheMac3.chr8                     126563354 1 + 150158102 T
i rheMac3.chr8                     C 0 I 1
s papHam1.scaffold1185                 76609 1 +    226188 T
i papHam1.scaffold1185             C 0 I 1
s calJac3.chr16                     23626780 1 -  96796970 C
i calJac3.chr16                    C 0 I 923
s saiBol1.JH378158                   9048832 1 -  16265076 C
i saiBol1.JH378158                 C 0 I 873
s micMur1.scaffold_4913                88782 1 +    135929 C
i micMur1.scaffold_4913            I 2 C 0
s susScr3.chr4                      18485315 1 + 143465943 T
i susScr3.chr4                     C 0 C 0
s vicPac1.scaffold_13                1516671 1 +   2369290 T
i vicPac1.scaffold_13              C 0 C 0
s oviAri1.chr9                      68470010 1 - 100831284 T
i oviAri1.chr9                     C 0 C 0
s bosTau7.chr14                     63541506 1 -  81216349 T
i bosTau7.chr14                    C 0 C 0
s canFam3.chr13                     20335771 1 +  63241923 T
i canFam3.chr13                    C 0 C 0
s equCab2.chr9                      64365794 1 +  83561422 C
i equCab2.chr9                     C 0 C 0
s myoLuc2.GL429784                   8891911 1 +  14577598 C
i myoLuc2.GL429784                 C 0 C 0
s sorAra1.scaffold_245118              37003 1 +     38740 A
i sorAra1.scaffold_245118          C 0 C 0
s loxAfr3.scaffold_8                67683782 1 +  85640724 C
i loxAfr3.scaffold_8               C 0 C 0
s proCap1.scaffold_5125                52909 1 +     62060 C
i proCap1.scaffold_5125            C 0 C 0
s triMan1.JH594628                   9783146 1 +  24477914 C
i triMan1.JH594628                 C 0 C 0
s choHof1.scaffold_1338                23247 1 +     46317 C
i choHof1.scaffold_1338            C 0 C 0
e ochPri2.scaffold_3008                37098 2113 +    168654 I
e otoGar3.GL873523                  39379089 530 -  47749213 I
e echTel1.scaffold_246123               4312 4388 -     12816 I
e oryCun2.chr3                     137515560 506 + 155691105 I
e ailMel1.GL193711.1                  154484 1013 -    529242 I
e gorGor3.chr8                     121284328 8675 + 145327772 T
e panTro4.chr8                     120286079 878 + 143986469 I
e hg19.chr8                        122649055 872 + 146364022 I
e cavPor3.scaffold_95                5255370 1757 -   5884597 I
e hetGla2.JH602048                   9047594 0 -  42145720 C
e ponAbe2.chr8                     129324097 879 + 153482349 I
e pteVam1.scaffold_9062                51215 1943 +     66173 I
e tarSyr1.scaffold_52304               12306 1183 +     14295 I
e felCat5.chrF2                     64500355 1160 +  82763536 I
e dasNov3.JH579962                   3295089 678 +   3334091 I
e melGal1.chr3                      88078472 9551 + 100405168 I
e sarHar1.chr2_GL841388_random        481984 12896 +   1237177 I
e melUnd1.JH556481                    782640 58368 +   3508697 I
e turTru2.JH479543                     20044 2626 -    135452 I
e monDom5.chr3                     395438024 14746 + 527952102 I
e chrPic1.JH584538                    404458 7740 +   8176890 I
e tupBel1.scaffold_119809.1-330533     16105 2070 +    330533 I
e galGal4.chr2                     136949488 65088 + 148809762 I

a score=-2445.000000
s mm10.chr15                        56690782 1 + 104043685 A
s rn5.chr7                          97077796 1 + 143501887 G
i rn5.chr7                         C 0 C 0
s speTri2.JH393280                  21198572 1 -  46620681 G
i speTri2.JH393280                 C 0 C 0
s oryCun2.chr3                     137516066 1 + 155691105 A
i oryCun2.chr3                     I 506 C 0
s micMur1.scaffold_4913                88783 1 +    135929 A
i micMur1.scaffold_4913            C 0 C 0
s susScr3.chr4                      18485316 1 + 143465943 A
i susScr3.chr4                     C 0 I 1
s vicPac1.scaffold_13                1516672 1 +   2369290 A
i vicPac1.scaffold_13              C 0 I 1
s oviAri1.chr9                      68470011 1 - 100831284 A
i oviAri1.chr9                     C 0 I 1
s bosTau7.chr14                     63541507 1 -  81216349 G
i bosTau7.chr14                    C 0 I 1
s canFam3.chr13                     20335772 1 +  63241923 C
i canFam3.chr13                    C 0 I 1
s equCab2.chr9                      64365795 1 +  83561422 C
i equCab2.chr9                     C 0 I 1
s myoLuc2.GL429784                   8891912 1 +  14577598 T
i myoLuc2.GL429784                 C 0 I 1
s sorAra1.scaffold_245118              37004 1 +     38740 C
i sorAra1.scaffold_245118          C 0 I 1
s loxAfr3.scaffold_8                67683783 1 +  85640724 A
i loxAfr3.scaffold_8               C 0 I 8
s proCap1.scaffold_5125                52910 1 +     62060 A
i proCap1.scaffold_5125            C 0 I 8
s triMan1.JH594628                   9783147 1 +  24477914 A
i triMan1.JH594628                 C 0 I 8
s choHof1.scaffold_1338                23248 1 +     46317 A
i choHof1.scaffold_1338            C 0 C 0
e ochPri2.scaffold_3008                37098 2113 +    168654 I
e otoGar3.GL873523                  39379089 530 -  47749213 I
e echTel1.scaffold_246123               4312 4388 -     12816 I
e ailMel1.GL193711.1                  154484 1013 -    529242 I
e saiBol1.JH378158                   9048833 873 -  16265076 I
e gorGor3.chr8                     121284328 8675 + 145327772 T
e panTro4.chr8                     120286079 878 + 143986469 I
e hg19.chr8                        122649055 872 + 146364022 I
e cavPor3.scaffold_95                5255370 1757 -   5884597 I
e hetGla2.JH602048                   9047594 0 -  42145720 C
e calJac3.chr16                     23626781 923 -  96796970 I
e rheMac3.chr8                     126563355 1 + 150158102 I
e nomLeu2.GL397267                  35741881 1 +  48819562 I
e ponAbe2.chr8                     129324097 879 + 153482349 I
e papHam1.scaffold1185                 76610 1 +    226188 I
e pteVam1.scaffold_9062                51215 1943 +     66173 I
e tarSyr1.scaffold_52304               12306 1183 +     14295 I
e felCat5.chrF2                     64500355 1160 +  82763536 I
e dasNov3.JH579962                   3295089 678 +   3334091 I
e melGal1.chr3                      88078472 9551 + 100405168 I
e sarHar1.chr2_GL841388_random        481984 12896 +   1237177 I
e melUnd1.JH556481                    782640 58368 +   3508697 I
e turTru2.JH479543                     20044 2626 -    135452 I
e monDom5.chr3                     395438024 14746 + 527952102 I
e chrPic1.JH584538                    404458 7740 +   8176890 I
e tupBel1.scaffold_119809.1-330533     16105 2070 +    330533 I
e galGal4.chr2                     136949488 65088 + 148809762 I

a score=-24640.000000
s mm10.chr15                        56690783 2 + 104043685 TG
s rn5.chr7                          97077797 2 + 143501887 TG
i rn5.chr7                         C 0 C 0
s speTri2.JH393280                  21198573 2 -  46620681 TG
i speTri2.JH393280                 C 0 I 636
s oryCun2.chr3                     137516067 2 + 155691105 TA
i oryCun2.chr3                     C 0 C 0
s nomLeu2.GL397267                  35741882 2 +  48819562 TG
i nomLeu2.GL397267                 I 1 I 859
s rheMac3.chr8                     126563356 2 + 150158102 TA
i rheMac3.chr8                     I 1 I 853
s papHam1.scaffold1185                 76611 2 +    226188 TA
i papHam1.scaffold1185             I 1 I 854
s micMur1.scaffold_4913                88784 2 +    135929 TA
i micMur1.scaffold_4913            C 0 C 0
s otoGar3.GL873523                  39379619 2 -  47749213 TG
i otoGar3.GL873523                 I 530 C 0
s susScr3.chr4                      18485318 1 + 143465943 T-
i susScr3.chr4                     I 1 C 0
s vicPac1.scaffold_13                1516674 1 +   2369290 T-
i vicPac1.scaffold_13              I 1 C 0
s oviAri1.chr9                      68470013 1 - 100831284 T-
i oviAri1.chr9                     I 1 C 0
s bosTau7.chr14                     63541509 1 -  81216349 T-
i bosTau7.chr14                    I 1 C 0
s canFam3.chr13                     20335774 1 +  63241923 C-
i canFam3.chr13                    I 1 C 0
s equCab2.chr9                      64365797 1 +  83561422 T-
i equCab2.chr9                     I 1 C 0
s myoLuc2.GL429784                   8891914 1 +  14577598 C-
i myoLuc2.GL429784                 I 1 C 0
s sorAra1.scaffold_245118              37006 1 +     38740 T-
i sorAra1.scaffold_245118          I 1 C 0
s dasNov3.JH579962                   3295767 2 +   3334091 TG
i dasNov3.JH579962                 I 678 C 0
s choHof1.scaffold_1338                23249 2 +     46317 TG
i choHof1.scaffold_1338            C 0 C 0
e ochPri2.scaffold_3008                37098 2113 +    168654 I
e echTel1.scaffold_246123               4312 4388 -     12816 I
e ailMel1.GL193711.1                  154484 1013 -    529242 I
e saiBol1.JH378158                   9048833 873 -  16265076 I
e gorGor3.chr8                     121284328 8675 + 145327772 T
e panTro4.chr8                     120286079 878 + 143986469 I
e hg19.chr8                        122649055 872 + 146364022 I
e triMan1.JH594628                   9783148 8 +  24477914 I
e loxAfr3.scaffold_8                67683784 8 +  85640724 I
e cavPor3.scaffold_95                5255370 1757 -   5884597 I
e hetGla2.JH602048                   9047594 0 -  42145720 C
e calJac3.chr16                     23626781 923 -  96796970 I
e ponAbe2.chr8                     129324097 879 + 153482349 I
e pteVam1.scaffold_9062                51215 1943 +     66173 I
e tarSyr1.scaffold_52304               12306 1183 +     14295 I
e felCat5.chrF2                     64500355 1160 +  82763536 I
e melGal1.chr3                      88078472 9551 + 100405168 I
e sarHar1.chr2_GL841388_random        481984 12896 +   1237177 I
e melUnd1.JH556481                    782640 58368 +   3508697 I
e turTru2.JH479543                     20044 2626 -    135452 I
e monDom5.chr3                     395438024 14746 + 527952102 I
e proCap1.scaffold_5125                52911 8 +     62060 I
e chrPic1.JH584538                    404458 7740 +   8176890 I
e tupBel1.scaffold_119809.1-330533     16105 2070 +    330533 I
e galGal4.chr2                     136949488 65088 + 148809762 I

a score=13527.000000
s mm10.chr15                        56690785 1 + 104043685 A
s rn5.chr7                          97077799 1 + 143501887 A
i rn5.chr7                         C 0 C 0
s hetGla2.JH602048                   9047594 1 -  42145720 A
i hetGla2.JH602048                 C 0 C 0
s speTri2.JH393280                  21199211 1 -  46620681 a
i speTri2.JH393280                 I 636 C 0
s oryCun2.chr3                     137516069 1 + 155691105 A
i oryCun2.chr3                     C 0 C 0
s hg19.chr8                        122649927 1 + 146364022 A
i hg19.chr8                        I 872 C 0
s panTro4.chr8                     120286957 1 + 143986469 A
i panTro4.chr8                     I 878 C 0
s ponAbe2.chr8                     129324976 1 + 153482349 A
i ponAbe2.chr8                     I 879 C 0
s nomLeu2.GL397267                  35742743 1 +  48819562 A
i nomLeu2.GL397267                 I 859 C 0
s rheMac3.chr8                     126564211 1 + 150158102 A
i rheMac3.chr8                     I 853 C 0
s papHam1.scaffold1185                 77467 1 +    226188 A
i papHam1.scaffold1185             I 854 C 0
s calJac3.chr16                     23627704 1 -  96796970 A
i calJac3.chr16                    I 923 C 0
s saiBol1.JH378158                   9049706 1 -  16265076 A
i saiBol1.JH378158                 I 873 C 0
s micMur1.scaffold_4913                88786 1 +    135929 A
i micMur1.scaffold_4913            C 0 C 0
s otoGar3.GL873523                  39379621 1 -  47749213 A
i otoGar3.GL873523                 C 0 C 0
s susScr3.chr4                      18485319 1 + 143465943 G
i susScr3.chr4                     C 0 C 0
s vicPac1.scaffold_13                1516675 1 +   2369290 G
i vicPac1.scaffold_13              C 0 C 0
s oviAri1.chr9                      68470014 1 - 100831284 G
i oviAri1.chr9                     C 0 C 0
s bosTau7.chr14                     63541510 1 -  81216349 G
i bosTau7.chr14                    C 0 C 0
s canFam3.chr13                     20335775 1 +  63241923 A
i canFam3.chr13                    C 0 I 3
s equCab2.chr9                      64365798 1 +  83561422 G
i equCab2.chr9                     C 0 C 0
s myoLuc2.GL429784                   8891915 1 +  14577598 A
i myoLuc2.GL429784                 C 0 I 3
s sorAra1.scaffold_245118              37007 1 +     38740 G
i sorAra1.scaffold_245118          C 0 I 1
s dasNov3.JH579962                   3295769 1 +   3334091 A
i dasNov3.JH579962                 C 0 C 0
s choHof1.scaffold_1338                23251 1 +     46317 A
i choHof1.scaffold_1338            C 0 C 0
e ochPri2.scaffold_3008                37098 2113 +    168654 I
e echTel1.scaffold_246123               4312 4388 -     12816 I
e ailMel1.GL193711.1                  154484 1013 -    529242 I
e gorGor3.chr8                     121284328 8675 + 145327772 T
e triMan1.JH594628                   9783148 8 +  24477914 I
e loxAfr3.scaffold_8                67683784 8 +  85640724 I
e cavPor3.scaffold_95                5255370 1757 -   5884597 I
e pteVam1.scaffold_9062                51215 1943 +     66173 I
e tarSyr1.scaffold_52304               12306 1183 +     14295 I
e felCat5.chrF2                     64500355 1160 +  82763536 I
e melGal1.chr3                      88078472 9551 + 100405168 I
e sarHar1.chr2_GL841388_random        481984 12896 +   1237177 I
e melUnd1.JH556481                    782640 58368 +   3508697 I
e turTru2.JH479543                     20044 2626 -    135452 I
e monDom5.chr3                     395438024 14746 + 527952102 I
e proCap1.scaffold_5125                52911 8 +     62060 I
e chrPic1.JH584538                    404458 7740 +   8176890 I
e tupBel1.scaffold_119809.1-330533     16105 2070 +    330533 I
e galGal4.chr2                     136949488 65088 + 148809762 I

a score=24225.000000
s mm10.chr15                        56690786 1 + 104043685 A
s rn5.chr7                          97077800 1 + 143501887 A
i rn5.chr7                         C 0 C 0
s hetGla2.JH602048                   9047595 1 -  42145720 A
i hetGla2.JH602048                 C 0 C 0
s speTri2.JH393280                  21199212 1 -  46620681 a
i speTri2.JH393280                 C 0 C 0
s oryCun2.chr3                     137516070 1 + 155691105 A
i oryCun2.chr3                     C 0 C 0
s hg19.chr8                        122649928 1 + 146364022 A
i hg19.chr8                        C 0 C 0
s panTro4.chr8                     120286958 1 + 143986469 A
i panTro4.chr8                     C 0 C 0
s ponAbe2.chr8                     129324977 1 + 153482349 A
i ponAbe2.chr8                     C 0 C 0
s nomLeu2.GL397267                  35742744 1 +  48819562 A
i nomLeu2.GL397267                 C 0 C 0
s rheMac3.chr8                     126564212 1 + 150158102 A
i rheMac3.chr8                     C 0 C 0
s papHam1.scaffold1185                 77468 1 +    226188 A
i papHam1.scaffold1185             C 0 C 0
s calJac3.chr16                     23627705 1 -  96796970 A
i calJac3.chr16                    C 0 C 0
s saiBol1.JH378158                   9049707 1 -  16265076 A
i saiBol1.JH378158                 C 0 C 0
s tarSyr1.scaffold_52304               13489 1 +     14295 A
i tarSyr1.scaffold_52304           I 1183 C 0
s micMur1.scaffold_4913                88787 1 +    135929 A
i micMur1.scaffold_4913            C 0 C 0
s otoGar3.GL873523                  39379622 1 -  47749213 A
i otoGar3.GL873523                 C 0 C 0
s susScr3.chr4                      18485320 1 + 143465943 A
i susScr3.chr4                     C 0 C 0
s vicPac1.scaffold_13                1516676 1 +   2369290 A
i vicPac1.scaffold_13              C 0 C 0
s felCat5.chrF2                     64501515 1 +  82763536 A
i felCat5.chrF2                    I 1160 C 0
s canFam3.chr13                     20335779 1 +  63241923 A
i canFam3.chr13                    I 3 C 0
s equCab2.chr9                      64365799 1 +  83561422 A
i equCab2.chr9                     C 0 C 0
s myoLuc2.GL429784                   8891919 1 +  14577598 A
i myoLuc2.GL429784                 I 3 I 595
s pteVam1.scaffold_9062                53158 1 +     66173 A
i pteVam1.scaffold_9062            I 1943 C 0
s sorAra1.scaffold_245118              37009 1 +     38740 A
i sorAra1.scaffold_245118          I 1 I 1
s dasNov3.JH579962                   3295770 1 +   3334091 T
i dasNov3.JH579962                 C 0 C 0
s choHof1.scaffold_1338                23252 1 +     46317 A
i choHof1.scaffold_1338            C 0 C 0
e ochPri2.scaffold_3008                37098 2113 +    168654 I
e echTel1.scaffold_246123               4312 4388 -     12816 I
e ailMel1.GL193711.1                  154484 1013 -    529242 I
e gorGor3.chr8                     121284328 8675 + 145327772 T
e triMan1.JH594628                   9783148 8 +  24477914 I
e loxAfr3.scaffold_8                67683784 8 +  85640724 I
e bosTau7.chr14                     63541511 0 -  81216349 C
e cavPor3.scaffold_95                5255370 1757 -   5884597 I
e oviAri1.chr9                      68470015 0 - 100831284 C
e melGal1.chr3                      88078472 9551 + 100405168 I
e sarHar1.chr2_GL841388_random        481984 12896 +   1237177 I
e melUnd1.JH556481                    782640 58368 +   3508697 I
e turTru2.JH479543                     20044 2626 -    135452 I
e monDom5.chr3                     395438024 14746 + 527952102 I
e proCap1.scaffold_5125                52911 8 +     62060 I
e chrPic1.JH584538                    404458 7740 +   8176890 I
e tupBel1.scaffold_119809.1-330533     16105 2070 +    330533 I
e galGal4.chr2                     136949488 65088 + 148809762 I

a score=23144.000000
s mm10.chr15                        56690787 2 + 104043685 AT
s rn5.chr7                          97077801 2 + 143501887 AT
i rn5.chr7                         C 0 C 0
s hetGla2.JH602048                   9047596 2 -  42145720 GT
i hetGla2.JH602048                 C 0 C 0
s speTri2.JH393280                  21199213 2 -  46620681 at
i speTri2.JH393280                 C 0 C 0
s oryCun2.chr3                     137516071 2 + 155691105 AT
i oryCun2.chr3                     C 0 C 0
s hg19.chr8                        122649929 2 + 146364022 AT
i hg19.chr8                        C 0 C 0
s panTro4.chr8                     120286959 2 + 143986469 AT
i panTro4.chr8                     C 0 C 0
s ponAbe2.chr8                     129324978 2 + 153482349 AT
i ponAbe2.chr8                     C 0 C 0
s nomLeu2.GL397267                  35742745 2 +  48819562 AT
i nomLeu2.GL397267                 C 0 C 0
s rheMac3.chr8                     126564213 2 + 150158102 AT
i rheMac3.chr8                     C 0 C 0
s papHam1.scaffold1185                 77469 2 +    226188 AT
i papHam1.scaffold1185             C 0 C 0
s calJac3.chr16                     23627706 2 -  96796970 AT
i calJac3.chr16                    C 0 C 0
s saiBol1.JH378158                   9049708 2 -  16265076 AT
i saiBol1.JH378158                 C 0 C 0
s tarSyr1.scaffold_52304               13490 2 +     14295 AT
i tarSyr1.scaffold_52304           C 0 C 0
s micMur1.scaffold_4913                88788 2 +    135929 AT
i micMur1.scaffold_4913            C 0 I 553
s otoGar3.GL873523                  39379623 2 -  47749213 AT
i otoGar3.GL873523                 C 0 C 0
s susScr3.chr4                      18485321 2 + 143465943 AA
i susScr3.chr4                     C 0 C 0
s vicPac1.scaffold_13                1516677 2 +   2369290 AT
i vicPac1.scaffold_13              C 0 C 0
s felCat5.chrF2                     64501516 2 +  82763536 AT
i felCat5.chrF2                    C 0 C 0
s canFam3.chr13                     20335780 2 +  63241923 AT
i canFam3.chr13                    C 0 I 1414
s equCab2.chr9                      64365800 2 +  83561422 AT
i equCab2.chr9                     C 0 C 0
s pteVam1.scaffold_9062                53159 2 +     66173 AT
i pteVam1.scaffold_9062            C 0 C 0
s sorAra1.scaffold_245118              37011 1 +     38740 G-
i sorAra1.scaffold_245118          I 1 I 1
s loxAfr3.scaffold_8                67683792 2 +  85640724 TT
i loxAfr3.scaffold_8               I 8 C 0
s proCap1.scaffold_5125                52919 2 +     62060 CT
i proCap1.scaffold_5125            I 8 C 0
s triMan1.JH594628                   9783156 2 +  24477914 TT
i triMan1.JH594628                 I 8 C 0
s dasNov3.JH579962                   3295771 2 +   3334091 TT
i dasNov3.JH579962                 C 0 C 0
s choHof1.scaffold_1338                23253 2 +     46317 AT
i choHof1.scaffold_1338            C 0 I 709
e ochPri2.scaffold_3008                37098 2113 +    168654 I
e echTel1.scaffold_246123               4312 4388 -     12816 I
e myoLuc2.GL429784                   8891920 595 +  14577598 I
e ailMel1.GL193711.1                  154484 1013 -    529242 I
e gorGor3.chr8                     121284328 8675 + 145327772 T
e bosTau7.chr14                     63541511 0 -  81216349 C
e cavPor3.scaffold_95                5255370 1757 -   5884597 I
e oviAri1.chr9                      68470015 0 - 100831284 C
e melGal1.chr3                      88078472 9551 + 100405168 I
e sarHar1.chr2_GL841388_random        481984 12896 +   1237177 I
e melUnd1.JH556481                    782640 58368 +   3508697 I
e turTru2.JH479543                     20044 2626 -    135452 I
e monDom5.chr3                     395438024 14746 + 527952102 I
e chrPic1.JH584538                    404458 7740 +   8176890 I
e tupBel1.scaffold_119809.1-330533     16105 2070 +    330533 I
e galGal4.chr2                     136949488 65088 + 148809762 I

a score=31941.000000
s mm10.chr15                        56690789 1 + 104043685 A
s rn5.chr7                          97077803 1 + 143501887 A
i rn5.chr7                         C 0 C 0
s hetGla2.JH602048                   9047598 1 -  42145720 A
i hetGla2.JH602048                 C 0 C 0
s speTri2.JH393280                  21199215 1 -  46620681 a
i speTri2.JH393280                 C 0 C 0
s oryCun2.chr3                     137516073 1 + 155691105 A
i oryCun2.chr3                     C 0 C 0
s hg19.chr8                        122649931 1 + 146364022 A
i hg19.chr8                        C 0 C 0
s panTro4.chr8                     120286961 1 + 143986469 A
i panTro4.chr8                     C 0 C 0
s ponAbe2.chr8                     129324980 1 + 153482349 A
i ponAbe2.chr8                     C 0 C 0
s nomLeu2.GL397267                  35742747 1 +  48819562 A
i nomLeu2.GL397267                 C 0 C 0
s rheMac3.chr8                     126564215 1 + 150158102 A
i rheMac3.chr8                     C 0 C 0
s papHam1.scaffold1185                 77471 1 +    226188 A
i papHam1.scaffold1185             C 0 C 0
s calJac3.chr16                     23627708 1 -  96796970 A
i calJac3.chr16                    C 0 C 0
s saiBol1.JH378158                   9049710 1 -  16265076 A
i saiBol1.JH378158                 C 0 C 0
s tarSyr1.scaffold_52304               13492 1 +     14295 A
i tarSyr1.scaffold_52304           C 0 C 0
s otoGar3.GL873523                  39379625 1 -  47749213 A
i otoGar3.GL873523                 C 0 C 0
s susScr3.chr4                      18485323 1 + 143465943 A
i susScr3.chr4                     C 0 C 0
s vicPac1.scaffold_13                1516679 1 +   2369290 A
i vicPac1.scaffold_13              C 0 C 0
s oviAri1.chr9                      68470015 1 - 100831284 A
i oviAri1.chr9                     C 0 C 0
s bosTau7.chr14                     63541511 1 -  81216349 A
i bosTau7.chr14                    C 0 C 0
s felCat5.chrF2                     64501518 1 +  82763536 A
i felCat5.chrF2                    C 0 C 0
s equCab2.chr9                      64365802 1 +  83561422 A
i equCab2.chr9                     C 0 C 0
s pteVam1.scaffold_9062                53161 1 +     66173 A
i pteVam1.scaffold_9062            C 0 C 0
s sorAra1.scaffold_245118              37013 1 +     38740 A
i sorAra1.scaffold_245118          I 1 C 0
s loxAfr3.scaffold_8                67683794 1 +  85640724 A
i loxAfr3.scaffold_8               C 0 C 0
s proCap1.scaffold_5125                52921 1 +     62060 A
i proCap1.scaffold_5125            C 0 C 0
s triMan1.JH594628                   9783158 1 +  24477914 A
i triMan1.JH594628                 C 0 C 0
s dasNov3.JH579962                   3295773 1 +   3334091 A
i dasNov3.JH579962                 C 0 C 0
e ochPri2.scaffold_3008                37098 2113 +    168654 I
e choHof1.scaffold_1338                23255 709 +     46317 I
e micMur1.scaffold_4913                88790 553 +    135929 I
e echTel1.scaffold_246123               4312 4388 -     12816 I
e myoLuc2.GL429784                   8891920 595 +  14577598 I
e ailMel1.GL193711.1                  154484 1013 -    529242 I
e gorGor3.chr8                     121284328 8675 + 145327772 T
e cavPor3.scaffold_95                5255370 1757 -   5884597 I
e canFam3.chr13                     20335782 1414 +  63241923 I
e melGal1.chr3                      88078472 9551 + 100405168 I
e sarHar1.chr2_GL841388_random        481984 12896 +   1237177 I
e melUnd1.JH556481                    782640 58368 +   3508697 I
e turTru2.JH479543                     20044 2626 -    135452 I
e monDom5.chr3                     395438024 14746 + 527952102 I
e chrPic1.JH584538                    404458 7740 +   8176890 I
e tupBel1.scaffold_119809.1-330533     16105 2070 +    330533 I
e galGal4.chr2                     136949488 65088 + 148809762 I

a score=107780.000000
s mm10.chr15                        56690790 5 + 104043685 ATGCA
s rn5.chr7                          97077804 5 + 143501887 ATGTA
i rn5.chr7                         C 0 C 0
s hetGla2.JH602048                   9047599 5 -  42145720 ACGTA
i hetGla2.JH602048                 C 0 C 0
s speTri2.JH393280                  21199216 5 -  46620681 attta
i speTri2.JH393280                 C 0 C 0
s oryCun2.chr3                     137516074 5 + 155691105 ATTTA
i oryCun2.chr3                     C 0 C 0
s hg19.chr8                        122649932 5 + 146364022 ATTTA
i hg19.chr8                        C 0 C 0
s panTro4.chr8                     120286962 5 + 143986469 ATTTA
i panTro4.chr8                     C 0 C 0
s ponAbe2.chr8                     129324981 5 + 153482349 ATTTA
i ponAbe2.chr8                     C 0 C 0
s nomLeu2.GL397267                  35742748 5 +  48819562 ATTTA
i nomLeu2.GL397267                 C 0 C 0
s rheMac3.chr8                     126564216 5 + 150158102 ATTTA
i rheMac3.chr8                     C 0 C 0
s papHam1.scaffold1185                 77472 5 +    226188 ATTTA
i papHam1.scaffold1185             C 0 C 0
s calJac3.chr16                     23627709 5 -  96796970 ATATA
i calJac3.chr16                    C 0 C 0
s saiBol1.JH378158                   9049711 5 -  16265076 ATATA
i saiBol1.JH378158                 C 0 C 0
s tarSyr1.scaffold_52304               13493 5 +     14295 ATTTA
i tarSyr1.scaffold_52304           C 0 C 0
s micMur1.scaffold_4913                89343 5 +    135929 ATACA
i micMur1.scaffold_4913            I 553 C 0
s otoGar3.GL873523                  39379626 5 -  47749213 ATTTA
i otoGar3.GL873523                 C 0 C 0
s susScr3.chr4                      18485324 5 + 143465943 ATTTA
i susScr3.chr4                     C 0 C 0
s vicPac1.scaffold_13                1516680 5 +   2369290 ATTTA
i vicPac1.scaffold_13              C 0 C 0
s oviAri1.chr9                      68470016 5 - 100831284 ATTTA
i oviAri1.chr9                     C 0 C 0
s bosTau7.chr14                     63541512 5 -  81216349 ATTTA
i bosTau7.chr14                    C 0 C 0
s felCat5.chrF2                     64501519 5 +  82763536 ATTTA
i felCat5.chrF2                    C 0 C 0
s equCab2.chr9                      64365803 5 +  83561422 ATTTA
i equCab2.chr9                     C 0 C 0
s pteVam1.scaffold_9062                53162 5 +     66173 ACTTA
i pteVam1.scaffold_9062            C 0 C 0
s sorAra1.scaffold_245118              37014 4 +     38740 ACTC-
i sorAra1.scaffold_245118          C 0 I 1
s loxAfr3.scaffold_8                67683795 5 +  85640724 ATTTG
i loxAfr3.scaffold_8               C 0 C 0
s proCap1.scaffold_5125                52922 5 +     62060 ATTTA
i proCap1.scaffold_5125            C 0 C 0
s triMan1.JH594628                   9783159 5 +  24477914 ATTTA
i triMan1.JH594628                 C 0 C 0
s dasNov3.JH579962                   3295774 5 +   3334091 ATTTA
i dasNov3.JH579962                 C 0 C 0
e ochPri2.scaffold_3008                37098 2113 +    168654 I
e choHof1.scaffold_1338                23255 709 +     46317 I
e echTel1.scaffold_246123               4312 4388 -     12816 I
e myoLuc2.GL429784                   8891920 595 +  14577598 I
e ailMel1.GL193711.1                  154484 1013 -    529242 I
e gorGor3.chr8                     121284328 8675 + 145327772 T
e cavPor3.scaffold_95                5255370 1757 -   5884597 I
e canFam3.chr13                     20335782 1414 +  63241923 I
e melGal1.chr3                      88078472 9551 + 100405168 I
e sarHar1.chr2_GL841388_random        481984 12896 +   1237177 I
e melUnd1.JH556481                    782640 58368 +   3508697 I
e turTru2.JH479543                     20044 2626 -    135452 I
e monDom5.chr3                     395438024 14746 + 527952102 I
e chrPic1.JH584538                    404458 7740 +   8176890 I
e tupBel1.scaffold_119809.1-330533     16105 2070 +    330533 I
e galGal4.chr2                     136949488 65088 + 148809762 I

a score=-5905.000000
s mm10.chr15                        56690795 4 + 104043685 AAGC
s rn5.chr7                          97077809 4 + 143501887 AAGC
i rn5.chr7                         C 0 C 0
s hetGla2.JH602048                   9047604 4 -  42145720 AAGC
i hetGla2.JH602048                 C 0 C 0
s speTri2.JH393280                  21199221 4 -  46620681 aggc
i speTri2.JH393280                 C 0 C 0
s oryCun2.chr3                     137516079 4 + 155691105 AAAC
i oryCun2.chr3                     C 0 C 0
s hg19.chr8                        122649937 4 + 146364022 AGGC
i hg19.chr8                        C 0 C 0
s panTro4.chr8                     120286967 4 + 143986469 AGGC
i panTro4.chr8                     C 0 C 0
s ponAbe2.chr8                     129324986 4 + 153482349 AGGC
i ponAbe2.chr8                     C 0 C 0
s nomLeu2.GL397267                  35742753 4 +  48819562 AAGC
i nomLeu2.GL397267                 C 0 C 0
s rheMac3.chr8                     126564221 4 + 150158102 AGGC
i rheMac3.chr8                     C 0 C 0
s papHam1.scaffold1185                 77477 4 +    226188 AGGC
i papHam1.scaffold1185             C 0 C 0
s calJac3.chr16                     23627714 4 -  96796970 AGGC
i calJac3.chr16                    C 0 C 0
s saiBol1.JH378158                   9049716 4 -  16265076 AGGC
i saiBol1.JH378158                 C 0 C 0
s tarSyr1.scaffold_52304               13498 4 +     14295 AAGC
i tarSyr1.scaffold_52304           C 0 C 0
s micMur1.scaffold_4913                89348 4 +    135929 GGGC
i micMur1.scaffold_4913            C 0 C 0
s otoGar3.GL873523                  39379631 4 -  47749213 GGGG
i otoGar3.GL873523                 C 0 C 0
s susScr3.chr4                      18485329 3 + 143465943 AGG-
i susScr3.chr4                     C 0 C 0
s vicPac1.scaffold_13                1516685 3 +   2369290 AGA-
i vicPac1.scaffold_13              C 0 C 0
s oviAri1.chr9                      68470021 3 - 100831284 AGA-
i oviAri1.chr9                     C 0 C 0
s bosTau7.chr14                     63541517 3 -  81216349 AGA-
i bosTau7.chr14                    C 0 C 0
s felCat5.chrF2                     64501524 3 +  82763536 AGG-
i felCat5.chrF2                    C 0 C 0
s ailMel1.GL193711.1                  155497 3 -    529242 AGG-
i ailMel1.GL193711.1               I 1013 C 0
s equCab2.chr9                      64365808 3 +  83561422 AGG-
i equCab2.chr9                     C 0 C 0
s myoLuc2.GL429784                   8892515 3 +  14577598 AGG-
i myoLuc2.GL429784                 I 595 C 0
s pteVam1.scaffold_9062                53167 3 +     66173 AAG-
i pteVam1.scaffold_9062            C 0 C 0
s sorAra1.scaffold_245118              37019 3 +     38740 AAG-
i sorAra1.scaffold_245118          I 1 C 0
s loxAfr3.scaffold_8                67683800 4 +  85640724 AAGT
i loxAfr3.scaffold_8               C 0 C 0
s proCap1.scaffold_5125                52927 4 +     62060 AGCT
i proCap1.scaffold_5125            C 0 C 0
s triMan1.JH594628                   9783164 4 +  24477914 AGGT
i triMan1.JH594628                 C 0 C 0
s dasNov3.JH579962                   3295779 4 +   3334091 AGGA
i dasNov3.JH579962                 C 0 C 0
e ochPri2.scaffold_3008                37098 2113 +    168654 I
e choHof1.scaffold_1338                23255 709 +     46317 I
e echTel1.scaffold_246123               4312 4388 -     12816 I
e gorGor3.chr8                     121284328 8675 + 145327772 T
e cavPor3.scaffold_95                5255370 1757 -   5884597 I
e canFam3.chr13                     20335782 1414 +  63241923 I
e melGal1.chr3                      88078472 9551 + 100405168 I
e sarHar1.chr2_GL841388_random        481984 12896 +   1237177 I
e melUnd1.JH556481                    782640 58368 +   3508697 I
e turTru2.JH479543                     20044 2626 -    135452 I
e monDom5.chr3                     395438024 14746 + 527952102 I
e chrPic1.JH584538                    404458 7740 +   8176890 I
e tupBel1.scaffold_119809.1-330533     16105 2070 +    330533 I
e galGal4.chr2                     136949488 65088 + 148809762 I

a score=35248.000000
s mm10.chr15                        56690799 1 + 104043685 T
s rn5.chr7                          97077813 1 + 143501887 T
i rn5.chr7                         C 0 C 0
s hetGla2.JH602048                   9047608 1 -  42145720 T
i hetGla2.JH602048                 C 0 C 0
s speTri2.JH393280                  21199225 1 -  46620681 t
i speTri2.JH393280                 C 0 C 0
s oryCun2.chr3                     137516083 1 + 155691105 T
i oryCun2.chr3                     C 0 C 0
s hg19.chr8                        122649941 1 + 146364022 T
i hg19.chr8                        C 0 C 0
s panTro4.chr8                     120286971 1 + 143986469 T
i panTro4.chr8                     C 0 C 0
s ponAbe2.chr8                     129324990 1 + 153482349 T
i ponAbe2.chr8                     C 0 C 0
s nomLeu2.GL397267                  35742757 1 +  48819562 T
i nomLeu2.GL397267                 C 0 C 0
s rheMac3.chr8                     126564225 1 + 150158102 T
i rheMac3.chr8                     C 0 C 0
s papHam1.scaffold1185                 77481 1 +    226188 T
i papHam1.scaffold1185             C 0 C 0
s calJac3.chr16                     23627718 1 -  96796970 T
i calJac3.chr16                    C 0 C 0
s saiBol1.JH378158                   9049720 1 -  16265076 T
i saiBol1.JH378158                 C 0 C 0
s tarSyr1.scaffold_52304               13502 1 +     14295 C
i tarSyr1.scaffold_52304           C 0 C 0
s micMur1.scaffold_4913                89352 1 +    135929 T
i micMur1.scaffold_4913            C 0 C 0
s otoGar3.GL873523                  39379635 1 -  47749213 T
i otoGar3.GL873523                 C 0 C 0
s susScr3.chr4                      18485332 1 + 143465943 T
i susScr3.chr4                     C 0 C 0
s vicPac1.scaffold_13                1516688 1 +   2369290 T
i vicPac1.scaffold_13              C 0 I 36558
s turTru2.JH479543                     22670 1 -    135452 T
i turTru2.JH479543                 I 2626 C 0
s oviAri1.chr9                      68470024 1 - 100831284 T
i oviAri1.chr9                     C 0 C 0
s bosTau7.chr14                     63541520 1 -  81216349 T
i bosTau7.chr14                    C 0 C 0
s felCat5.chrF2                     64501527 1 +  82763536 T
i felCat5.chrF2                    C 0 C 0
s ailMel1.GL193711.1                  155500 1 -    529242 T
i ailMel1.GL193711.1               C 0 C 0
s equCab2.chr9                      64365811 1 +  83561422 T
i equCab2.chr9                     C 0 C 0
s myoLuc2.GL429784                   8892518 1 +  14577598 T
i myoLuc2.GL429784                 C 0 C 0
s pteVam1.scaffold_9062                53170 1 +     66173 T
i pteVam1.scaffold_9062            C 0 C 0
s sorAra1.scaffold_245118              37022 1 +     38740 T
i sorAra1.scaffold_245118          C 0 C 0
s loxAfr3.scaffold_8                67683804 1 +  85640724 T
i loxAfr3.scaffold_8               C 0 C 0
s proCap1.scaffold_5125                52931 1 +     62060 T
i proCap1.scaffold_5125            C 0 C 0
s triMan1.JH594628                   9783168 1 +  24477914 T
i triMan1.JH594628                 C 0 C 0
s dasNov3.JH579962                   3295783 1 +   3334091 C
i dasNov3.JH579962                 C 0 C 0
e ochPri2.scaffold_3008                37098 2113 +    168654 I
e choHof1.scaffold_1338                23255 709 +     46317 I
e echTel1.scaffold_246123               4312 4388 -     12816 I
e gorGor3.chr8                     121284328 8675 + 145327772 T
e cavPor3.scaffold_95                5255370 1757 -   5884597 I
e canFam3.chr13                     20335782 1414 +  63241923 I
e melGal1.chr3                      88078472 9551 + 100405168 I
e sarHar1.chr2_GL841388_random        481984 12896 +   1237177 I
e melUnd1.JH556481                    782640 58368 +   3508697 I
e monDom5.chr3                     395438024 14746 + 527952102 I
e chrPic1.JH584538                    404458 7740 +   8176890 I
e tupBel1.scaffold_119809.1-330533     16105 2070 +    330533 I
e galGal4.chr2                     136949488 65088 + 148809762 I

a score=251448.000000
s mm10.chr15                        56690800 20 + 104043685 AT--ATGTAGCA--AGTTCATA-----CT
s rn5.chr7                          97077814 22 + 143501887 ATTTGTGTAGCA--AGTCCATA-----GT
i rn5.chr7                         C 0 C 0
s hetGla2.JH602048                   9047609 20 -  42145720 AC--ATGTAATT--GGATGACA-----TT
i hetGla2.JH602048                 C 0 C 0
s speTri2.JH393280                  21199226 22 -  46620681 ac--atgtggtaggggatgata-----ct
i speTri2.JH393280                 C 0 C 0
s oryCun2.chr3                     137516084 20 + 155691105 AT--ACATAGTG--GGATGATA-----CT
i oryCun2.chr3                     C 0 C 0
s hg19.chr8                        122649942 16 + 146364022 GT--ATGCAGTA--GGATAA---------
i hg19.chr8                        C 0 C 0
s panTro4.chr8                     120286972 16 + 143986469 GT--ATGCAGTA--GGATAA---------
i panTro4.chr8                     C 0 C 0
s ponAbe2.chr8                     129324991 16 + 153482349 GT--ATGCAGTA--GGATAA---------
i ponAbe2.chr8                     C 0 C 0
s nomLeu2.GL397267                  35742758 20 +  48819562 GT--ATGCAGTA--GGATAATA-----CT
i nomLeu2.GL397267                 C 0 C 0
s rheMac3.chr8                     126564226 20 + 150158102 GT--ATGCAGTA--GGATAATA-----CT
i rheMac3.chr8                     C 0 C 0
s papHam1.scaffold1185                 77482 20 +    226188 GT--ATGCAGTA--GGATAATA-----CT
i papHam1.scaffold1185             C 0 C 0
s calJac3.chr16                     23627719 16 -  96796970 GT--ATGCAGTA--GGATAA---------
i calJac3.chr16                    C 0 C 0
s saiBol1.JH378158                   9049721 16 -  16265076 GT--ATGCAGTA--GGATAA---------
i saiBol1.JH378158                 C 0 C 0
s tarSyr1.scaffold_52304               13503 20 +     14295 GT--CTGCAGTA--GGATAATA-----CT
i tarSyr1.scaffold_52304           C 0 C 0
s micMur1.scaffold_4913                89353 25 +    135929 AT--ATGCAGTA--GGGTGATACTTATTC
i micMur1.scaffold_4913            C 0 C 0
s otoGar3.GL873523                  39379636 20 -  47749213 AT--AAGCGGTA--GGACAATA-----TT
i otoGar3.GL873523                 C 0 C 0
s susScr3.chr4                      18485333 20 + 143465943 AT--ATACAGTG--GGATGATA-----CT
i susScr3.chr4                     C 0 C 0
s vicPac1.scaffold_13                1553247 20 +   2369290 AT--ATGCAGTG--GGATGATT-----CT
i vicPac1.scaffold_13              I 36558 C 0
s turTru2.JH479543                     22671 20 -    135452 AT--ATGCAGTG--GGATGTTA-----CT
i turTru2.JH479543                 C 0 C 0
s oviAri1.chr9                      68470025 20 - 100831284 AT--ATGCAGTG--GGATAATA-----CT
i oviAri1.chr9                     C 0 C 0
s bosTau7.chr14                     63541521 17 -  81216349 AT--ATGCAGTG--GGATAAT--------
i bosTau7.chr14                    C 0 C 0
s felCat5.chrF2                     64501528 20 +  82763536 AT--ATGCCGTG--GGGCGATA-----CT
i felCat5.chrF2                    C 0 C 0
s ailMel1.GL193711.1                  155501 20 -    529242 AT--ACGGAGTG--GGGTGATA-----CT
i ailMel1.GL193711.1               C 0 C 0
s equCab2.chr9                      64365812 20 +  83561422 AT--GTGCGGTA--GGATGACG-----CT
i equCab2.chr9                     C 0 C 0
s myoLuc2.GL429784                   8892519 20 +  14577598 GT--GTGCAATG--GGATGATA-----CG
i myoLuc2.GL429784                 C 0 C 0
s pteVam1.scaffold_9062                53171 19 +     66173 GT--ATGCAATG--GGATGTTA-----C-
i pteVam1.scaffold_9062            C 0 C 0
s sorAra1.scaffold_245118              37023 15 +     38740 AT--ATGCATTG--GGATG----------
i sorAra1.scaffold_245118          C 0 C 0
s loxAfr3.scaffold_8                67683805 20 +  85640724 AT--ATGCAGTG--CCATTGTA-----CA
i loxAfr3.scaffold_8               C 0 C 0
s proCap1.scaffold_5125                52932 20 +     62060 AT--GTGCAGTA--GGATGCCA-----CA
i proCap1.scaffold_5125            C 0 C 0
s triMan1.JH594628                   9783169 20 +  24477914 AT--ATGCAGTG--GGATGATA-----CA
i triMan1.JH594628                 C 0 C 0
s dasNov3.JH579962                   3295784 20 +   3334091 AT--ATGCAATG--GTATGATA-----CT
i dasNov3.JH579962                 C 0 I 4
e ochPri2.scaffold_3008                37098 2113 +    168654 I
e choHof1.scaffold_1338                23255 709 +     46317 I
e echTel1.scaffold_246123               4312 4388 -     12816 I
e gorGor3.chr8                     121284328 8675 + 145327772 T
e cavPor3.scaffold_95                5255370 1757 -   5884597 I
e canFam3.chr13                     20335782 1414 +  63241923 I
e melGal1.chr3                      88078472 9551 + 100405168 I
e sarHar1.chr2_GL841388_random        481984 12896 +   1237177 I
e melUnd1.JH556481                    782640 58368 +   3508697 I
e monDom5.chr3                     395438024 14746 + 527952102 I
e chrPic1.JH584538                    404458 7740 +   8176890 I
e tupBel1.scaffold_119809.1-330533     16105 2070 +    330533 I
e galGal4.chr2                     136949488 65088 + 148809762 I

a score=1743811.000000
s mm10.chr15                        56690820 119 + 104043685 TACTCTA-TGCAAGTTTCTGTG----ACCA-AGAACATGATTACAG-ACAAGTTA-TGGTAACTCATGGCAATGGGTTTTCTATTCAGGAAGCT---------------CTAAG-CCCTATTCAGCTAATACAGGAGCTCC--------CA
s rn5.chr7                          97077836 132 + 143501887 CATTCTA-TACAGGTTTCTGTG----ATGG-AGAAAATGATTA-AA-ATAAGTTG-TGGTAACTCATGGCAATGGGTCTTCTATATAGGAAGCTTCTATATAGGAAGCTCTAGC-CCCTATTCAGCTAATGCACCAGCTCC---------A
i rn5.chr7                         C 0 C 0
s hetGla2.JH602048                   9047629 113 -  42145720 TATTCTAGCGCAGATTGCTGCT----AAAG-GGGAAAAGATTA-GA-ATGAACCT-GAGGAA---GTGGAAATGAGTTTTCTGCTCAGGAG------------------TTGCC-CCTCACCTGGCCAACACATCAGCTAC--------TA
i hetGla2.JH602048                 C 0 C 0
s speTri2.JH393280                  21199248  79 -  46620681 tattcta-tgcagatttcggcc----agat-aggaaaggaata-aa-gt----------------gtggaGCTG-------TCCCCAGGCTGCT---------------CTA---------CCAGCTCA---------TCC--------TG
i speTri2.JH393280                 C 0 C 0
s oryCun2.chr3                     137516104 115 + 155691105 TATTCTG-TATCAAATACTGCT----GGAG-GAGGAGGGATTA-AA-AACCAACT-TGGCAGGG-GCATAAATATTTTTTCTACAGAGGGAGCA---------------GTG---CCCTACTCAGCTGACATTCCCGCTGC--------CA
i oryCun2.chr3                     C 0 C 0
s hg19.chr8                        122649958 113 + 146364022 TACTCTA-CACAGATTGCTGCT----AGAA-GGGAAAGGATAA-AATACCAAGTT-GGGGTG---ATGGAAATGAG--TTCTCTACAGGTAGCT---------------GTC-C-CTCCACTCTGTTGGCATACCAGCTGC--------CA
i hg19.chr8                        C 0 C 0
s panTro4.chr8                     120286988 113 + 143986469 TACTCTA-CACAGATTGCTGCT----AGAA-GGGAAAGGATAA-AATACCAAGTT-GGGGTG---ATGGAAATGAG--TTCTCTACAGGTAGCT---------------GTC-C-CTCCACTCCGTTGGCATACCAGCTGC--------CA
i panTro4.chr8                     C 0 C 0
s ponAbe2.chr8                     129325007 114 + 153482349 TACTCTA-CACAGATTGC-GCT----AGAG-AGGAAAGGATAA-AACACCAAGTT-GGGGTG---ATGGAAATCAGTTTTCTCTACAGGTAGCT---------------ATC-C-CTCCACTCCGTTGGCATACCAGCTGC--------CA
i ponAbe2.chr8                     C 0 C 0
s nomLeu2.GL397267                  35742778 115 +  48819562 TACTCTA-CACCGATTGCTGCT----AGAG-GGGGAAGGATAA-AACACCAAGTT-GGGATG---ATGGAAATGAGTTTTCTCTACAGGTAACT---------------GTC-C-CTCCACTCCGTTGGCATACCAGCTGC--------CA
i nomLeu2.GL397267                 C 0 C 0
s rheMac3.chr8                     126564246 115 + 150158102 TACTCTA-CATAGATCGTTGCT----AGAG-GGGAAACGATAA-AACAACAAGTT-GGGGTG---ATGGAAATTAGTTTTCTCTACAGGTAGCT---------------GTC-C-CTCCACTCCGTTGATATACGAGCTGC--------AA
i rheMac3.chr8                     C 0 C 0
s papHam1.scaffold1185                 77502 115 +    226188 TACTCTA-CATAGATCGCTGCT----AGAG-GGGAAAGGATAA-AACAACAAGTT-GGGGTG---ATGGAAATTAGTTTTCTCTACAGGTAGCT---------------GTC-C-CTCCACTCCATTGATATACGAGCTGC--------CA
i papHam1.scaffold1185             C 0 C 0
s calJac3.chr16                     23627735 115 -  96796970 TACTCTA-CACAGATTGCTGCT----AGAG-TGGAAAGGATAA-AACACCAAGTT-GGGATG---ATGGAAATGAGTCTTCTCTACAGGTAGCT---------------GTC-C-CCCAGCTCAGTTGACATACCGGCTGC--------CA
i calJac3.chr16                    C 0 C 0
s saiBol1.JH378158                   9049737 115 -  16265076 TACTCTA-CACCGATTGCTGCT----AGAG-GGGAAAGGATAA-AACATCAAGTT-GGGATG---ATGAAAATGAGTTTTCTCTGCAGGTAGCT---------------GTC-C-CTCAGCTCAGTTGACATACCGGCTGC--------TA
i saiBol1.JH378158                 C 0 C 0
s tarSyr1.scaffold_52304               13523 108 +     14295 TACTCTA-TGTGGATTGCTGCG----ACAA-AGGAAAGTATCG-TA-GTCAAGC-----ATT---ACGGAATTGTGTTTCCTACCCAGG-AGCT---------------GTC-C-C-CACCTCAGTGGATACAAGGGCTGC--------CT
i tarSyr1.scaffold_52304           C 0 C 0
s micMur1.scaffold_4913                89378 113 +    135929 TACTCTC-CGTAGATTGCTGCT----AAAG-GGGAAAGGATTA-AA-ACCTAGTT-GGGGTA---GTGGAAATGAGTTTTCTATACAGGGAGCT---------------GTC-C-C-CCTTTCAGGTGACATACCAGCTAC--------CA
i micMur1.scaffold_4913            C 0 M 359
s otoGar3.GL873523                  39379656 110 -  47749213 TACTCTC-CATAGATTACTACTATGGAGAG-GGGAGAGGATT--AA-ACGCAGTA-GGGGTG---GTGGAAATGAGTTTTCTACACAGGGAG-----------------------C-CCTCTCAGTTGATAGACCAGCTAC--------CA
i otoGar3.GL873523                 C 0 C 0
s susScr3.chr4                      18485353 111 + 143465943 TAG----------ATTGCTGCT----ACAG-AGGAAAGAACTG-AA-ACCAAGTT-GGGGTG---ATAGTAATGATATTTCT--GCAGGGAGCT---------------GTC-C-CCCCTTTCAGCTGTCATACCAGCCTCTTAGAGAACA
i susScr3.chr4                     C 0 C 0
s vicPac1.scaffold_13                1553267 110 +   2369290 CAGTCTA-TGCAGATTGCTGC------TAG-AGGAAAGAATTA-AA-ACCAAATT-GGGGTG---ATCAAAATGATTTTTCT--GCAGGGAGCT---------------GTC-C-CCCCATTCAGCTGTCATAACAGCTGC--------CA
i vicPac1.scaffold_13              C 0 C 0
s turTru2.JH479543                     22691 112 -    135452 TAATCTA-TGCAGATTGCTGCT----ACAG-A-GAAAGGATTA-AA-ACCAAGCT-GGGGTG---ATGGAAATGATTTTTCT--GCAGAGAGCT---------------GTC-GCTCCCATTCAGCTGTCATACCACCTGC--------CA
i turTru2.JH479543                 C 0 C 0
s oviAri1.chr9                      68470045 112 - 100831284 AAGTCTA-TGCAGACTACTGCT----ACAG-AGGAAAGGATTA-AA-ACCAAGTTGGGGGTG---ATGAAACTGATTTTTCT--GCAGGGAGCT---------------GTC-C-CCCCATTCAG-TGTCATACAAGCTGC--------CA
i oviAri1.chr9                     C 0 C 0
s bosTau7.chr14                     63541538  98 -  81216349 -AGTCTA-TG-----------------CAG-AGGAAAGGATTA-AA-ACCAAGTT-GGGGTG---ATGAAACTGATTTTTCT--GCAGGGACCT---------------GTC-CTCCCCATTCAG-TGTTATACAAGCTGC--------CA
i bosTau7.chr14                    C 0 C 0
s felCat5.chrF2                     64501548 110 +  82763536 TATTCTA-GGCAGATTGCCACT----GGAG-AGAAAAGGATTA-AA-ACCAAGTT-GA---G---GTGGCGGTGATTTTTCT--ACAGGGAGCT---------------GTCTC-CCCCAATCAGCTGTCGTACTAGCTGC--------CA
i felCat5.chrF2                    C 0 C 0
s ailMel1.GL193711.1                  155521 109 -    529242 TACTCTA-CGCAGATTGCCGCT-----AAG-AGGAAAGGATTA-AA-ACCAAGTT-GG---G---GTGGAAATGATTTTTCT--ACAGGGAGCT---------------GTCTG-CCCCATTCAGCTGTCATACCAGCTGC--------CA
i ailMel1.GL193711.1               C 0 C 0
s equCab2.chr9                      64365832 111 +  83561422 TATTCTA-TGCAGACTGCTGGC----AGAG-AGGAAAGGATTA-AA-ACCAAGCT-GG-GTG---ATGGAAATGATTTTCCT--ACAGGGAGCT---------------GTC-C-CCCCATTCAGCTGTCATACCAGCTGC--------CA
i equCab2.chr9                     C 0 C 0
s myoLuc2.GL429784                   8892539 112 +  14577598 TATTCTA-TGCAGATTGCTGCG----AGAC-AGTACAGGGTTA-AA-ACCACATT-GGGGTG---ATGGAAGGGGTTTTTCG--GCAGGGAGCT---------------GTT-C-CCCCATTCAGCTGTCAGACCAGCTGC--------CC
i myoLuc2.GL429784                 C 0 C 0
s pteVam1.scaffold_9062                53190 109 +     66173 ----TTA-TGCAGATTGCTGCT----CAAG-AGGAAAAGATTA-AA-ACCAAGTCAAGGGTG---ATAGAAGTGATTTTTCT--ATGGCAAGCT---------------GTC-C-CGCCATTCAGCTGTCATACCAGCTGC--------CA
i pteVam1.scaffold_9062            C 0 C 0
s sorAra1.scaffold_245118              37038 107 +     38740 -----TA-TCCAGATTGCTGTT----GGAGaaaaaaaGGGTTA-AA-GTCAAACT-TATTTG---ATGAAAG-GATTCTTCT--CTAGGGAACT---------------GGC-C-CTCCATTCAGCTGTCAATTCAGCTGC--------CA
i sorAra1.scaffold_245118          C 0 C 0
s loxAfr3.scaffold_8                67683825 111 +  85640724 TTTTCTA-TAGAGATTGCTGCT----AAAG-GGGAAAGGGTTA-AA-GCCAAGTT-GGAGTG---ATGGAAATGAGTTTTCT--ACAGGGAACT---------------GTC---CCCAACTCAGCTGTCATACCAGCTGC--------CA
i loxAfr3.scaffold_8               C 0 C 0
s proCap1.scaffold_5125                52952 111 +     62060 TTTTCTA-TAGCGATTGCTTTT----AGGA-AGGAAAGGGTTA-CA-GTCAAGTT-AGAGTG---ATGGAAATGAGTTTTCA--ACAGGGAGCT---------------GTC---CCCAACTCAGCTGTCATACCAGCTGC--------CA
i proCap1.scaffold_5125            C 0 C 0
s triMan1.JH594628                   9783189 111 +  24477914 TTTTCTA-TAGAGATTGCTGCT----AGAA-AGGAAAGGGTTA-AA-GCCAAGTT-GGAGTG---ATGGCAATGAGTTTTCA--ACAGGGAGCT---------------GTC---CCCCACTCAGCTGTCATACCAGCTGC--------CA
i triMan1.JH594628                 C 0 C 0
s dasNov3.JH579962                   3295808 108 +   3334091 TATTACC-AGCAGATCGCTGCT----AACG-ATAAAAGGGTTA-AA-ACCAAGTC-AGAGTG---ATGGAAAT---TTTTCT--ACAAGGAGCT---------------TTC---CCCTACTCAGCTGTCTTACCAGCTGC--------CA
i dasNov3.JH579962                 I 4 C 0
s choHof1.scaffold_1338                23964 108 +     46317 TATTCCA-TGCAGGTTGCTGCT----AAAG-AAGCAAAGGTTA-AA-ACCAAGTC-AGAGTG---ATGGATAT---TTTTCT--ACAGGAAGCT---------------TTC---CCCCACTCAGCTGTCATACCAGCTGC--------CA
i choHof1.scaffold_1338            I 709 C 0
e ochPri2.scaffold_3008                37098 2113 +    168654 I
e echTel1.scaffold_246123               4312 4388 -     12816 I
e gorGor3.chr8                     121284328 8675 + 145327772 T
e cavPor3.scaffold_95                5255370 1757 -   5884597 I
e canFam3.chr13                     20335782 1414 +  63241923 I
e melGal1.chr3                      88078472 9551 + 100405168 I
e sarHar1.chr2_GL841388_random        481984 12896 +   1237177 I
e melUnd1.JH556481                    782640 58368 +   3508697 I
e monDom5.chr3                     395438024 14746 + 527952102 I
e chrPic1.JH584538                    404458 7740 +   8176890 I
e tupBel1.scaffold_119809.1-330533     16105 2070 +    330533 I
e galGal4.chr2                     136949488 65088 + 148809762 I

a score=509651.000000
s mm10.chr15                        56690939 60 + 104043685 GGAGCTCTGTCCCTATCCTCACAGCTTCTAGAA----------GAACACAG-CCTAGGTGT-------------GCATGGCT-G------------------A
s rn5.chr7                          97077968 60 + 143501887 GGAGATCTGTCCCTGTCCCCCAAGCTTCTAGAA----------GAACACAG-ACTAAGTAG-------------GCATGGCA-G------------------A
i rn5.chr7                         C 0 C 0
s hetGla2.JH602048                   9047742 54 -  42145720 TGAGCTCTGCTTTT------CCAGGTCTTAGAG----------GAACATGG-CCTGGGTGT-------------GCACAGAT-A------------------A
i hetGla2.JH602048                 C 0 C 0
s speTri2.JH393280                  21199327 41 -  46620681 GCAGCTTTG-------------------TAGAG----------GAACATGA-TCTGGGTAT-------------GCATGCAA-A------------------A
i speTri2.JH393280                 C 0 C 0
s oryCun2.chr3                     137516219 68 + 155691105 CCAGGGCTGTCCTTG-----TAACCTGGTAGAG----------GGATATAG-CCTGGTTATATAGAGGGATATAGCACAGGT-G------------------A
i oryCun2.chr3                     C 0 C 0
s hg19.chr8                        122650071 46 + 146364022 CCAACTCTGTCATTG--------------ACAG----------AAACACGG-CATGGGTTT-------------GCATGGAT-A------------------A
i hg19.chr8                        C 0 C 0
s panTro4.chr8                     120287101 46 + 143986469 CCAACTCTGTCATTG--------------ACAG----------GAACACGG-CATAGGTTT-------------GCATGGAT-A------------------A
i panTro4.chr8                     C 0 C 0
s ponAbe2.chr8                     129325121 46 + 153482349 CCAACTCTGTCATTG--------------ACAG----------GAACATGG-CATGGGTTT-------------GCATGGAT-A------------------A
i ponAbe2.chr8                     C 0 C 0
s nomLeu2.GL397267                  35742893 29 +  48819562 CCAACTCT-----------------------------------------GG-TATGGAACC-------------AGAGGGAG-A------------------A
i nomLeu2.GL397267                 C 0 C 0
s rheMac3.chr8                     126564361 46 + 150158102 CCAACTCTGTCACTG--------------ACAG----------GAACACAG-CCTGGGTTT-------------GCATGGAT-A------------------A
i rheMac3.chr8                     C 0 C 0
s papHam1.scaffold1185                 77617 46 +    226188 CCAACTCTGTCACTG--------------ACAG----------GAACACAG-CCTGGGTTT-------------GCATGGAT-A------------------A
i papHam1.scaffold1185             C 0 C 0
s calJac3.chr16                     23627850 55 -  96796970 CCAACTCTGTCATTG-----CAGCCTTTTAGAG----------GGACACAG-CCTAGGTTG-------------GCATGGAT-A------------------A
i calJac3.chr16                    C 0 C 0
s saiBol1.JH378158                   9049852 55 -  16265076 CCAACTCTGTCACTG-----CAGCCTCTTAGAG----------GAACACGG-CCTAAGTTG-------------GCATGGAT-A------------------A
i saiBol1.JH378158                 C 0 C 0
s tarSyr1.scaffold_52304               13631 53 +     14295 CCAA--GTGTCATGG-----CAGCCTTGCACAG----------GAAGGCGG-TCTGGGTGT-------------GCATGGAC-A------------------G
i tarSyr1.scaffold_52304           C 0 C 0
s otoGar3.GL873523                  39379766 53 -  47749213 CTGACTCTGTCCTTA-----TAGCCTT--AGAG----------GAACACAG-CCAGACTGT-------------GCATAGAT-A------------------A
i otoGar3.GL873523                 C 0 C 0
s susScr3.chr4                      18485464 54 + 143465943 AAGCTTCTGTCCTTA-----CAGCCTCTTAGGG----------AA-CAAAG-CATGGGCAT-------------GCAAGGAC-A------------------A
i susScr3.chr4                     C 0 I 2
s vicPac1.scaffold_13                1553377 44 +   2369290 TTGGTTCTGTCCTTG-----CAATTTCT-AGTG----------AA--ACAG-CGTGGAT---------------------AT-A------------------A
i vicPac1.scaffold_13              C 0 I 2
s turTru2.JH479543                     22803 54 -    135452 CTGGTTCTGTCCTTA-----TAGCCTCTCAGTG----------AA--ACAG-CCTGGATGT-------------GCATGGATCA------------------A
i turTru2.JH479543                 C 0 I 2
s oviAri1.chr9                      68470157 55 - 100831284 CAGGTTCTGACCTTA-----CAGCCTGTTAGTG----------GAGCACAG-CCTGGATGA-------------GCATGGGT-A------------------A
i oviAri1.chr9                     C 0 I 2
s bosTau7.chr14                     63541636 55 -  81216349 CAGGTTCTGTCCTTA-----CAGCCTGTTAGTG----------GAACACAG-CCTGGATGA-------------GCATGGGT-A------------------A
i bosTau7.chr14                    C 0 I 2
s felCat5.chrF2                     64501658 73 +  82763536 CTGGCTCTGTCCTTG-----CAGGCTCCTAGTG----------GAACACAG-CCTGAGTGA-------------AGGTGGAT-TTaaaaacaaaaacaagcaa
i felCat5.chrF2                    C 0 I 40
s ailMel1.GL193711.1                  155630 37 -    529242 CTGGCTTGGTCCTTG-----CAACCTCT-----------------------------GTGA-------------ATTTTGAT-T------------------G
i ailMel1.GL193711.1               C 0 I 21
s equCab2.chr9                      64365943 55 +  83561422 CTGGCTCTGTCCTTG-----CAGCCTCTCAGTG----------AAACACAG-CCTGGGTGT-------------GCATGGAT-A------------------A
i equCab2.chr9                     C 0 I 4
s myoLuc2.GL429784                   8892651 55 +  14577598 CTGGCTCTGTCCTGG-----CAGCCTCTTAGGG----------AAGCACAG-CCTGGGTGT-------------GCAGGGAT-A------------------A
i myoLuc2.GL429784                 C 0 I 3
s pteVam1.scaffold_9062                53299 61 +     66173 ATAGCTCTGTCCTTG-----CAGCCCCTTAGTG----------GAACACAG-CCAGGGTGT-------------GCAGGGAT-AAAATAG------------A
i pteVam1.scaffold_9062            C 0 I 3
s sorAra1.scaffold_245118              37145 54 +     38740 CAAGCTCTGT-CTTG-----CTGACTTTTAGTG----------AAACACAG-TCTAGATAT-------------GCATGGAT-G------------------A
i sorAra1.scaffold_245118          C 0 I 5
s loxAfr3.scaffold_8                67683936 55 +  85640724 CAGGCTCTGTCCTTG-----CAGCTTCTTAGAA----------GACCACAG-CCTGGGTAT-------------GCTGGGAT-A------------------A
i loxAfr3.scaffold_8               C 0 C 0
s proCap1.scaffold_5125                53063 55 +     62060 CTGGCTCTGTCCCTG-----TAGCTTCATAGAA----------GACCAAAG-CCTGGGTAT-------------GCAGGGAT-A------------------A
i proCap1.scaffold_5125            C 0 C 0
s triMan1.JH594628                   9783300 55 +  24477914 CTGGCTCTGTCCTTG-----CAACTTCTTAGAG----------GACCATCG-CCTGGGTAT-------------GCAAGGGT-A------------------A
i triMan1.JH594628                 C 0 C 0
s dasNov3.JH579962                   3295916 66 +   3334091 CAGGCTCTGTCCTTT-----TAGACTCTTAGAGGACACAAAGAGGACACAAGCCTGGGTGT-------------ATAAGGAC-A------------------A
i dasNov3.JH579962                 C 0 C 0
s choHof1.scaffold_1338                24072 56 +     46317 CAGGCTCTGTCCTTT-----CAGCCTGTTAGAAG---------GAACACAA-CCTGGGTGT-------------ATAGGGAT-A------------------A
i choHof1.scaffold_1338            C 0 C 0
e ochPri2.scaffold_3008                37098 2113 +    168654 I
e micMur1.scaffold_4913                89491 359 +    135929 M
e echTel1.scaffold_246123               4312 4388 -     12816 I
e gorGor3.chr8                     121284328 8675 + 145327772 T
e cavPor3.scaffold_95                5255370 1757 -   5884597 I
e canFam3.chr13                     20335782 1414 +  63241923 I
e melGal1.chr3                      88078472 9551 + 100405168 I
e sarHar1.chr2_GL841388_random        481984 12896 +   1237177 I
e melUnd1.JH556481                    782640 58368 +   3508697 I
e monDom5.chr3                     395438024 14746 + 527952102 I
e chrPic1.JH584538                    404458 7740 +   8176890 I
e tupBel1.scaffold_119809.1-330533     16105 2070 +    330533 I
e galGal4.chr2                     136949488 65088 + 148809762 I

a score=1356448.000000
s mm10.chr15                        56690999  97 + 104043685 AA---AGAACTCAG--A--------AAAGACA-CAGAGCTCATGTGTT-AGTCTCTCAAT-ACATTAATTTGTGGACTGC--------ATATCATGCAAGATGCAGATAGTTAATAATAC----------A---
s rn5.chr7                          97078028  98 + 143501887 AA---AGACCTCAA--A--------CAAGACA-CAGAGCTTATGTGCT-AGTCCCTCATTTGCATTAATCTGTGGACTGC--------CTATCATGGAATATTCAGGAAGTTAATAATCT----------G---
i rn5.chr7                         C 0 C 0
s hetGla2.JH602048                   9047796  83 -  42145720 AAAGGAGAACTCAGAAA--------AAAGACA-CTGGGTTTCTACTTT-GGTCTCACATT-ACATTAA------------------------CATCCAGAGGCTGGTAAGAGAACAA-------------A---
i hetGla2.JH602048                 C 0 C 0
s speTri2.JH393280                  21199368  68 -  46620681 AA-GGAGAACCCAA--A-------TGAAGACA-TGGGGTATATGCACT-----------T--------------------------------CATGAAAAAGCCAGGAAGCTAATAATGC---------AA---
i speTri2.JH393280                 C 0 C 0
s oryCun2.chr3                     137516287  96 + 155691105 AA---AGAATCCAG--G-------TGAAAACA-AGGGGTTTATGCTCA-GTCCTCCTATT-GTGTGAAGTCATCACTTGC--------ACTTCATGCCAGAGTCAGGAAGCTAACAAT------------G---
i oryCun2.chr3                     C 0 C 0
s hg19.chr8                        122650117 100 + 146364022 AAA-GAGAACCCAG--A-------AGGAGACA-TGGGGGTTATGCTCT-GTCCTCTCATT-ACTTTAACTCAGGGATCAC--------ACTTCATACAAGAGCCAGAAAGCTAGTAATGT----------A---
i hg19.chr8                        C 0 I 2
s panTro4.chr8                     120287147 100 + 143986469 AAA-GAGAACCCAG--A-------AGGAGACA-TGGGGGTTATGCTCT-GTCCTCTCATT-ACTTTAACTCAGGGATCAC--------ACTTCATACAAGAGCCAGGAAGCTAATAATGT----------A---
i panTro4.chr8                     C 0 I 2
s ponAbe2.chr8                     129325167 101 + 153482349 AAAGGAGAACCCAG--A-------AGGAGACA-TGGGGGTTATGCTCT-GTCCCCTCATT-AACTTAACCCAGGGATCAC--------ACTTCATACAAGAGCCAGGAAGCTAATAATGT----------A---
i ponAbe2.chr8                     C 0 I 3
s nomLeu2.GL397267                  35742922 100 +  48819562 AAG-GAGAACCCAG--A-------AGGAGACA-TGGGGGTTATGCTCT-GTCCTCTCATT-ACTTTAACTCAGGGATCAC--------ACTTCATACAAGAGCCAGGAAGCTAATAATGT----------A---
i nomLeu2.GL397267                 C 0 I 2
s rheMac3.chr8                     126564407 101 + 150158102 AGAGGAGAACCCAG--A-------AGGAGACA-TGGGGGTTATGCTCT-GTCCTCCCGTA-ACTTCAACTCAGGGATCAC--------ACTTCATACAAGAGCCAGGAAGCTAATAATGC----------A---
i rheMac3.chr8                     C 0 I 2
s papHam1.scaffold1185                 77663 101 +    226188 AGAGGAGAACCCAG--A-------AGGAGACA-TGGGGGTTATGCTCT-GTCCTCCCGTA-ACTTTAACTCAAGGATCAC--------ACTTCATACAAGAGCCAGGAAGCTAATAATGC----------A---
i papHam1.scaffold1185             C 0 I 2
s calJac3.chr16                     23627905 105 -  96796970 AAAGAAGAACCCAG--ATCACATTTTGAGACA-CAGGGGTTATGCTCT-GTCCTCCCATT-ACTTTAACTCAGGGATCAC--------ATTTCATATAAGAGCCAGGAAG---GTAATGT----------A---
i calJac3.chr16                    C 0 I 2
s saiBol1.JH378158                   9049907 108 -  16265076 AAAGAAGAAACCAG--ATCACATTTTGAAACA-CGGAGGTTATGCTCT-GTCCGCCCACT-ACTTTAACTCAGGGGTCAC--------ATTTCATACAAGAGCCAGGAAGCTAATAATGT----------A---
i saiBol1.JH378158                 C 0 I 2
s tarSyr1.scaffold_52304               13684  98 +     14295 AAA-AGGGAACCAG--A-------AAGAGACA-TGGA-GCTGCGCCCT-ATTCTC-CATC-GTGCTAACTCAGGGATCAC--------ACTTCATGCGAGAGTCCAAAAGCTAAGAATGC----------A---
i tarSyr1.scaffold_52304           C 0 N 0
s otoGar3.GL873523                  39379819 100 -  47749213 AAAGGAGAACCCAG--A-------AAGAGACG-TGGG-TTTATTCTCT-GTTCTCCCATT-ACATTACTTCATGGGTCAC--------ACTCCACGCAAGATCCAGGAAGCTGATACAGT----------A---
i otoGar3.GL873523                 C 0 C 0
s susScr3.chr4                      18485520  87 + 143465943 ---A--------GA--A-------AAGTGACA--GGGGGCTAGGCTCTAATTCTCCAGTT-ACCTTAACTCATAGCTCCC--------ACATTATATAAAAGTCAAGAAGTTAGTAAC----------------
i susScr3.chr4                     I 2 I 3
s vicPac1.scaffold_13                1553423  95 +   2369290 ---A-----CCCAG--A-------AGGTGACAGTGGGGTTTATGCTCTAATTCTCCAATT-ACATTAACTCATAGCTCCC--------ACATTATATAAAAGTCAAGAAGCTAATAATGT----------A---
i vicPac1.scaffold_13              I 2 C 0
s turTru2.JH479543                     22859  99 -    135452 ---AAAGAACCCAG--A-------AAGGGACAGTGGGGGTTATATTCT-ACTCTCCAATT-ATATTAACTGATAGCTCCC--------ACATTATATAAAAGTCAAGAAGTTCATAATGT----------A---
i turTru2.JH479543                 I 2 C 0
s oviAri1.chr9                      68470214  96 - 100831284 ---ACGAACCTTGT--A-------AAAGGACTGTGGGGCTTATGCTCT-ATTCTCCAATT-ACATTAACTTATAGCTCCC--------ACATTATATAAAAGCCAAGAAGTTAATAAT----------------
i oviAri1.chr9                     I 2 I 3
s bosTau7.chr14                     63541693  96 -  81216349 ---ACAGAACCTGT--A-------AAAGAACTGTGGGGCTTATGCTCT-ATTCTCCAATT-ACATTAACTTATAGCTCCC--------ACATTATATAAAAGCCAAGAAGTTAATAAT----------------
i bosTau7.chr14                    I 2 I 3
s felCat5.chrF2                     64501771  99 +  82763536 ---aCAGAACCCAG--A-------AAGAGACAGTGGAGTTTATGATCT-GTTCCCCAATT-ACATTAACTCATCACTCCC--------ATATTATGTAACAGTCAGGATGCTGATAATGT----------A---
i felCat5.chrF2                    I 40 C 0
s canFam3.chr13                     20337196  99 +  63241923 ---CCAGAACCCAG--A-------AGGGGACAGTGGAGTTTATGCTCT-GTTCTCTAATT-ACATTAATTCATCACTCCC--------ACATTATATAAAAGTCAGGAAGCTAATAATGT----------A---
i canFam3.chr13                    I 1414 C 0
s ailMel1.GL193711.1                  155688  99 -    529242 ---ACAGAACCCAG--A-------AAGGGACAATGGAGTTTATACTCT-GTTCTCCAAAT-ACCTTAACTCATCACTTGC--------ACATTACATAAAAGTCAGGAAGGTAATAATGT----------A---
i ailMel1.GL193711.1               I 21 C 0
s equCab2.chr9                      64366002  99 +  83561422 ---AGAGAACCCAG--A-------AAGGAACAGTGGGGTTTATGCTCT-ATTCTCCAAAT-ACACTAATTCATCACTCTC--------TCATTATCTGAAAGTCAGGGAGCTAACAATGT----------A---
i equCab2.chr9                     I 4 C 0
s myoLuc2.GL429784                   8892709 107 +  14577598 ---AGAGAACCCAG--A-------AAGGGACAAGTGGGGTTATGCTCT-CTTCTCCAATT-TCATTAACTCATCCCACCCACTCCCTTACATTATGCAAAAGTCAGGAAGCTAATAAGGT----------A---
i myoLuc2.GL429784                 I 3 C 0
s pteVam1.scaffold_9062                53363  95 +     66173 ---AGTGAACCCAG--A-------AAGGGACTGTAGGATTTACACGCT-GTTCTCCAATT-TCATTAACCCATTGCTTCC--------ACATT----AAAAGTCAAGAAGCTAATAATCA----------A---
i pteVam1.scaffold_9062            I 3 C 0
s sorAra1.scaffold_245118              37204 107 +     38740 ---TGAGCAACCAG--A-------AAGGAACAGTGTGGTTTATG--TC-ATTTTCTAATT-ACACTTACTCGTTATTCCC--------ATTTCATGCAATAATTAGAAAactgacaatatttttttaaaaa---
i sorAra1.scaffold_245118          I 5 C 0
s loxAfr3.scaffold_8                67683991 105 +  85640724 AAGGGAGAATTCAG--A-------AAGAGACACTGGGGTCCATGCTCA-GTTCTCCTATT-ACATTAGCTCATCACTCCC--------ACTTAATGCAAAAGCCAGGAGACTAAAAATGG----------AACA
i loxAfr3.scaffold_8               C 0 C 0
s proCap1.scaffold_5125                53118  84 +     62060 AAAGTAGAATCCAG--A-------CAGAGACAGTGAAGTTCATGCTCC-GTTCTCCTATT-ACATTAGCTCATCATTCCC--------ACTTAGT---------------------ATGG----------AACA
i proCap1.scaffold_5125            C 0 C 0
s triMan1.JH594628                   9783355 105 +  24477914 AATGGAGAATCCAG--A-------AAGAGACAGTGAAGTTCATGCTCT-GTTCTCCTATT-ACCTTAGCTCATCACTCCT--------ACTTAATGCAAGAGCCGGGAGACTAATAATGG----------AACA
i triMan1.JH594628                 C 0 C 0
s dasNov3.JH579962                   3295982 101 +   3334091 AA-GGAGAA-CCAG--A-------AAGGGGCAGT-GGGCTTATGCTCT-GTTCTCCCATT-ATATCAGTTCATCACTCCT--------GCTTCATGCACGAGCCGGAAGGCTGACAA-AG----------AACA
i dasNov3.JH579962                 C 0 C 0
s choHof1.scaffold_1338                24128 103 +     46317 AA-GGAGAACCCAG--G-------AGGGGTCAGTGGGGTTTATGCTCT-GTTCTCCCATG-ACATCAGCTCATCTCTCCC--------ACTTCATGCAAGAGCCAGAAGGCTAATAA-AG----------AGCA
i choHof1.scaffold_1338            C 0 C 0
e ochPri2.scaffold_3008                37098 2113 +    168654 I
e micMur1.scaffold_4913                89491 359 +    135929 M
e echTel1.scaffold_246123               4312 4388 -     12816 I
e gorGor3.chr8                     121284328 8675 + 145327772 T
e cavPor3.scaffold_95                5255370 1757 -   5884597 I
e melGal1.chr3                      88078472 9551 + 100405168 I
e sarHar1.chr2_GL841388_random        481984 12896 +   1237177 I
e melUnd1.JH556481                    782640 58368 +   3508697 I
e monDom5.chr3                     395438024 14746 + 527952102 I
e chrPic1.JH584538                    404458 7740 +   8176890 I
e tupBel1.scaffold_119809.1-330533     16105 2070 +    330533 I
e galGal4.chr2                     136949488 65088 + 148809762 I

a score=-2704.000000
s mm10.chr15                        56691096 3 + 104043685 CAA
s rn5.chr7                          97078126 3 + 143501887 CAA
i rn5.chr7                         C 0 C 0
s hetGla2.JH602048                   9047879 3 -  42145720 CTA
i hetGla2.JH602048                 C 0 C 0
s speTri2.JH393280                  21199436 3 -  46620681 TGA
i speTri2.JH393280                 C 0 C 0
s oryCun2.chr3                     137516383 3 + 155691105 TAA
i oryCun2.chr3                     C 0 C 0
s hg19.chr8                        122650219 2 + 146364022 -AA
i hg19.chr8                        I 2 I 1
s panTro4.chr8                     120287249 2 + 143986469 -AA
i panTro4.chr8                     I 2 I 1
s ponAbe2.chr8                     129325271 2 + 153482349 -AA
i ponAbe2.chr8                     I 3 I 1
s nomLeu2.GL397267                  35743024 2 +  48819562 -AA
i nomLeu2.GL397267                 I 2 I 1
s rheMac3.chr8                     126564510 2 + 150158102 -AA
i rheMac3.chr8                     I 2 I 1
s papHam1.scaffold1185                 77766 2 +    226188 -AA
i papHam1.scaffold1185             I 2 I 1
s calJac3.chr16                     23628012 2 -  96796970 -AA
i calJac3.chr16                    I 2 I 1
s saiBol1.JH378158                   9050017 2 -  16265076 -AA
i saiBol1.JH378158                 I 2 I 1
s otoGar3.GL873523                  39379919 2 -  47749213 -GA
i otoGar3.GL873523                 C 0 I 1
s vicPac1.scaffold_13                1553518 1 +   2369290 --A
i vicPac1.scaffold_13              C 0 I 4
s turTru2.JH479543                     22958 1 -    135452 --A
i turTru2.JH479543                 C 0 I 4
s felCat5.chrF2                     64501870 1 +  82763536 --A
i felCat5.chrF2                    C 0 I 4
s canFam3.chr13                     20337295 1 +  63241923 --A
i canFam3.chr13                    C 0 C 0
s ailMel1.GL193711.1                  155787 1 -    529242 --A
i ailMel1.GL193711.1               C 0 I 4
s equCab2.chr9                      64366101 1 +  83561422 --A
i equCab2.chr9                     C 0 I 4
s myoLuc2.GL429784                   8892816 1 +  14577598 --A
i myoLuc2.GL429784                 C 0 I 4
s pteVam1.scaffold_9062                53458 1 +     66173 --A
i pteVam1.scaffold_9062            C 0 I 4
s sorAra1.scaffold_245118              37311 1 +     38740 --a
i sorAra1.scaffold_245118          C 0 I 6
s loxAfr3.scaffold_8                67684096 3 +  85640724 AAA
i loxAfr3.scaffold_8               C 0 C 0
s proCap1.scaffold_5125                53202 3 +     62060 AAA
i proCap1.scaffold_5125            C 0 C 0
s triMan1.JH594628                   9783460 3 +  24477914 AAA
i triMan1.JH594628                 C 0 C 0
s dasNov3.JH579962                   3296083 3 +   3334091 TAA
i dasNov3.JH579962                 C 0 C 0
s choHof1.scaffold_1338                24231 3 +     46317 AAA
i choHof1.scaffold_1338            C 0 C 0
e susScr3.chr4                      18485607 3 + 143465943 I
e ochPri2.scaffold_3008                37098 2113 +    168654 I
e micMur1.scaffold_4913                89491 359 +    135929 M
e echTel1.scaffold_246123               4312 4388 -     12816 I
e gorGor3.chr8                     121284328 8675 + 145327772 T
e bosTau7.chr14                     63541789 3 -  81216349 I
e cavPor3.scaffold_95                5255370 1757 -   5884597 I
e oviAri1.chr9                      68470310 3 - 100831284 I
e melGal1.chr3                      88078472 9551 + 100405168 I
e sarHar1.chr2_GL841388_random        481984 12896 +   1237177 I
e melUnd1.JH556481                    782640 58368 +   3508697 I
e monDom5.chr3                     395438024 14746 + 527952102 I
e chrPic1.JH584538                    404458 7740 +   8176890 I
e tupBel1.scaffold_119809.1-330533     16105 2070 +    330533 I
e galGal4.chr2                     136949488 65088 + 148809762 I

a score=317628.000000
s mm10.chr15                        56691099 33 + 104043685 CTTCCTAGTATTCATT-------CATTCTC-AGATTCAAAA
s rn5.chr7                          97078129 26 + 143501887 CTCC-------TAATC-------CATTCTC-AGatttaaaa
i rn5.chr7                         C 0 I 2
s hetGla2.JH602048                   9047882 26 -  42145720 CTTG-------TTTCT-------TGTTCTT-AGATTGAATG
i hetGla2.JH602048                 C 0 I 2
s speTri2.JH393280                  21199439 26 -  46620681 CTTT-------TTATT-------TGATCTT-AAGTTTAATG
i speTri2.JH393280                 C 0 I 2
s oryCun2.chr3                     137516386 26 + 155691105 CAAG-------CCACG-------TGTTCTT-AGATTTAAAA
i oryCun2.chr3                     C 0 I 2
s hg19.chr8                        122650222 22 + 146364022 -----------CTACT-------TGTTCTT-AGACTTTGAA
i hg19.chr8                        I 1 I 2
s panTro4.chr8                     120287252 22 + 143986469 -----------CTACT-------TGTTCTT-AGACTTTGAA
i panTro4.chr8                     I 1 I 2
s ponAbe2.chr8                     129325274 22 + 153482349 -----------CTACT-------TGTTCTT-AGACTTTGAA
i ponAbe2.chr8                     I 1 I 2
s nomLeu2.GL397267                  35743027 22 +  48819562 -----------CTACT-------TGTTCTT-AGACTTTGAA
i nomLeu2.GL397267                 I 1 I 2
s rheMac3.chr8                     126564513 22 + 150158102 -----------CTACT-------TGTTCTT-AGACTTTGAA
i rheMac3.chr8                     I 1 I 2
s papHam1.scaffold1185                 77769 22 +    226188 -----------CTACT-------TGTTCTT-AGACTTTGAA
i papHam1.scaffold1185             I 1 I 2
s calJac3.chr16                     23628015 22 -  96796970 -----------CTGCT-------TGCCCTT-ACACTTTTAA
i calJac3.chr16                    I 1 I 2
s saiBol1.JH378158                   9050020 22 -  16265076 -----------CTGCC-------TGTTCTT-ACACTTTTAA
i saiBol1.JH378158                 I 1 I 2
s otoGar3.GL873523                  39379922 29 -  47749213 -----------CTTTTTCTCAGATTTTCTC-AGATTTAAAA
i otoGar3.GL873523                 I 1 I 2
s tupBel1.scaffold_119809.1-330533     18175 19 +    330533 ----------CCTTCT-------AGTGAGC-ACACAT----
i tupBel1.scaffold_119809.1-330533 I 2070 C 0
s susScr3.chr4                      18485610 21 + 143465943 -----------CTACT-------CATTCTT-AGATTAAAA-
i susScr3.chr4                     I 3 C 0
s vicPac1.scaffold_13                1553523 21 +   2369290 -----------CTGCT-------TGTTCTT-AGATTAAAA-
i vicPac1.scaffold_13              I 4 C 0
s turTru2.JH479543                     22963 22 -    135452 -----------TTGCT-------TGTTCTTAAGATTAAAA-
i turTru2.JH479543                 I 4 C 0
s oviAri1.chr9                      68470313 21 - 100831284 -----------CTACT-------TGTTCTT-AGATTAAAA-
i oviAri1.chr9                     I 3 C 0
s bosTau7.chr14                     63541792 21 -  81216349 -----------CTACT-------TGTTCTT-AGATTAAAA-
i bosTau7.chr14                    I 3 C 0
s felCat5.chrF2                     64501875 22 +  82763536 -----------CTACT-------TGCTCTT-AGATTGAAAA
i felCat5.chrF2                    I 4 C 0
s canFam3.chr13                     20337296 21 +  63241923 ------------TACT-------TGTTCTT-AAATTGAAAA
i canFam3.chr13                    C 0 I 1232
s ailMel1.GL193711.1                  155792 22 -    529242 -----------CCACT-------TGTTCTT-AAATTGAAAA
i ailMel1.GL193711.1               I 4 I 2
s equCab2.chr9                      64366106 22 +  83561422 -----------CTCCT-------TGTTCAT-AGATTTAAAA
i equCab2.chr9                     I 4 I 1
s myoLuc2.GL429784                   8892821 22 +  14577598 -----------CTACT-------TATTTTT-AGATTTAAAA
i myoLuc2.GL429784                 I 4 I 1
s pteVam1.scaffold_9062                53463 22 +     66173 -----------TTACT-------TGCTCTT-AGATTCAAAA
i pteVam1.scaffold_9062            I 4 I 1
s sorAra1.scaffold_245118              37318 21 +     38740 -----------ctaCA-------TAGTCTT-GTGTTAGAA-
i sorAra1.scaffold_245118          I 6 I 2
s loxAfr3.scaffold_8                67684099 22 +  85640724 -----------CTACT-------TGTTCTT-AGATTAAAAA
i loxAfr3.scaffold_8               C 0 I 1
s proCap1.scaffold_5125                53205 22 +     62060 -----------TTACT-------TGTTCTT-AGATTAAAAA
i proCap1.scaffold_5125            C 0 I 1
s triMan1.JH594628                   9783463 22 +  24477914 -----------CTACT-------TGTTCTT-AGATTAAAAA
i triMan1.JH594628                 C 0 I 1
s dasNov3.JH579962                   3296086 17 +   3334091 -----------CTACC-------TTTTC------TTAAACA
i dasNov3.JH579962                 C 0 I 1
s choHof1.scaffold_1338                24234 22 +     46317 -----------CTACT-------TGCTCTT-AGATTAAAAA
i choHof1.scaffold_1338            C 0 I 1
e ochPri2.scaffold_3008                37098 2113 +    168654 I
e micMur1.scaffold_4913                89491 359 +    135929 M
e echTel1.scaffold_246123               4312 4388 -     12816 I
e gorGor3.chr8                     121284328 8675 + 145327772 T
e cavPor3.scaffold_95                5255370 1757 -   5884597 I
e melGal1.chr3                      88078472 9551 + 100405168 I
e sarHar1.chr2_GL841388_random        481984 12896 +   1237177 I
e melUnd1.JH556481                    782640 58368 +   3508697 I
e monDom5.chr3                     395438024 14746 + 527952102 I
e chrPic1.JH584538                    404458 7740 +   8176890 I
e galGal4.chr2                     136949488 65088 + 148809762 I

a score=-38318.000000
s mm10.chr15                        56691132 4 + 104043685 GTAT
s rn5.chr7                          97078157 4 + 143501887 atat
i rn5.chr7                         I 2 C 0
s hetGla2.JH602048                   9047910 4 -  42145720 TTAC
i hetGla2.JH602048                 I 2 C 0
s speTri2.JH393280                  21199467 4 -  46620681 TAAC
i speTri2.JH393280                 I 2 C 0
s oryCun2.chr3                     137516414 4 + 155691105 TTAG
i oryCun2.chr3                     I 2 C 0
s hg19.chr8                        122650246 4 + 146364022 TAAA
i hg19.chr8                        I 2 C 0
s panTro4.chr8                     120287276 4 + 143986469 TAAA
i panTro4.chr8                     I 2 C 0
s ponAbe2.chr8                     129325298 4 + 153482349 TAAC
i ponAbe2.chr8                     I 2 C 0
s nomLeu2.GL397267                  35743051 4 +  48819562 TAAC
i nomLeu2.GL397267                 I 2 C 0
s rheMac3.chr8                     126564537 4 + 150158102 TAAC
i rheMac3.chr8                     I 2 C 0
s papHam1.scaffold1185                 77793 4 +    226188 TAAC
i papHam1.scaffold1185             I 2 C 0
s calJac3.chr16                     23628039 4 -  96796970 TAAC
i calJac3.chr16                    I 2 C 0
s saiBol1.JH378158                   9050044 4 -  16265076 TAAC
i saiBol1.JH378158                 I 2 C 0
s otoGar3.GL873523                  39379953 4 -  47749213 TAAC
i otoGar3.GL873523                 I 2 C 0
s tupBel1.scaffold_119809.1-330533     18194 2 +    330533 --AC
i tupBel1.scaffold_119809.1-330533 C 0 C 0
s susScr3.chr4                      18485631 2 + 143465943 --AT
i susScr3.chr4                     C 0 I 7
s vicPac1.scaffold_13                1553544 2 +   2369290 --AT
i vicPac1.scaffold_13              C 0 I 7
s turTru2.JH479543                     22985 2 -    135452 --AT
i turTru2.JH479543                 C 0 I 50535
s oviAri1.chr9                      68470334 2 - 100831284 --AT
i oviAri1.chr9                     C 0 I 7
s bosTau7.chr14                     63541813 2 -  81216349 --AT
i bosTau7.chr14                    C 0 I 7
s felCat5.chrF2                     64501897 2 +  82763536 --AT
i felCat5.chrF2                    C 0 I 374
s ailMel1.GL193711.1                  155816 2 -    529242 --AT
i ailMel1.GL193711.1               I 2 I 542
s equCab2.chr9                      64366129 2 +  83561422 --GT
i equCab2.chr9                     I 1 I 5
s myoLuc2.GL429784                   8892844 2 +  14577598 --GT
i myoLuc2.GL429784                 I 1 I 3
s pteVam1.scaffold_9062                53486 2 +     66173 --GC
i pteVam1.scaffold_9062            I 1 I 6
s sorAra1.scaffold_245118              37341 2 +     38740 --GT
i sorAra1.scaffold_245118          I 2 I 5
s loxAfr3.scaffold_8                67684123 3 +  85640724 TCA-
i loxAfr3.scaffold_8               I 1 C 0
s proCap1.scaffold_5125                53229 3 +     62060 TAC-
i proCap1.scaffold_5125            I 1 C 0
s triMan1.JH594628                   9783487 3 +  24477914 TAA-
i triMan1.JH594628                 I 1 C 0
s dasNov3.JH579962                   3296105 3 +   3334091 TAA-
i dasNov3.JH579962                 I 1 C 0
s choHof1.scaffold_1338                24258 3 +     46317 TAA-
i choHof1.scaffold_1338            I 1 C 0
e ochPri2.scaffold_3008                37098 2113 +    168654 I
e micMur1.scaffold_4913                89491 359 +    135929 M
e echTel1.scaffold_246123               4312 4388 -     12816 I
e gorGor3.chr8                     121284328 8675 + 145327772 T
e cavPor3.scaffold_95                5255370 1757 -   5884597 I
e canFam3.chr13                     20337317 1232 +  63241923 I
e melGal1.chr3                      88078472 9551 + 100405168 I
e sarHar1.chr2_GL841388_random        481984 12896 +   1237177 I
e melUnd1.JH556481                    782640 58368 +   3508697 I
e monDom5.chr3                     395438024 14746 + 527952102 I
e chrPic1.JH584538                    404458 7740 +   8176890 I
e galGal4.chr2                     136949488 65088 + 148809762 I

a score=7177.000000
s mm10.chr15                        56691136 1 + 104043685 T
s rn5.chr7                          97078161 1 + 143501887 t
i rn5.chr7                         C 0 C 0
s hetGla2.JH602048                   9047914 1 -  42145720 T
i hetGla2.JH602048                 C 0 I 1
s speTri2.JH393280                  21199471 1 -  46620681 T
i speTri2.JH393280                 C 0 I 1
s oryCun2.chr3                     137516418 1 + 155691105 C
i oryCun2.chr3                     C 0 C 0
s hg19.chr8                        122650250 1 + 146364022 T
i hg19.chr8                        C 0 I 1
s panTro4.chr8                     120287280 1 + 143986469 T
i panTro4.chr8                     C 0 I 1
s ponAbe2.chr8                     129325302 1 + 153482349 T
i ponAbe2.chr8                     C 0 I 1
s nomLeu2.GL397267                  35743055 1 +  48819562 T
i nomLeu2.GL397267                 C 0 I 1
s rheMac3.chr8                     126564541 1 + 150158102 T
i rheMac3.chr8                     C 0 I 1
s papHam1.scaffold1185                 77797 1 +    226188 T
i papHam1.scaffold1185             C 0 I 1
s calJac3.chr16                     23628043 1 -  96796970 T
i calJac3.chr16                    C 0 I 1
s saiBol1.JH378158                   9050048 1 -  16265076 T
i saiBol1.JH378158                 C 0 I 1
s otoGar3.GL873523                  39379957 1 -  47749213 T
i otoGar3.GL873523                 C 0 I 1
s tupBel1.scaffold_119809.1-330533     18196 1 +    330533 C
i tupBel1.scaffold_119809.1-330533 C 0 I 1
s loxAfr3.scaffold_8                67684126 1 +  85640724 T
i loxAfr3.scaffold_8               C 0 C 0
s proCap1.scaffold_5125                53232 1 +     62060 C
i proCap1.scaffold_5125            C 0 C 0
s triMan1.JH594628                   9783490 1 +  24477914 C
i triMan1.JH594628                 C 0 C 0
s dasNov3.JH579962                   3296108 1 +   3334091 C
i dasNov3.JH579962                 C 0 C 0
s choHof1.scaffold_1338                24261 1 +     46317 C
i choHof1.scaffold_1338            C 0 C 0
e susScr3.chr4                      18485633 7 + 143465943 I
e ochPri2.scaffold_3008                37098 2113 +    168654 I
e sorAra1.scaffold_245118              37343 5 +     38740 I
e micMur1.scaffold_4913                89491 359 +    135929 M
e echTel1.scaffold_246123               4312 4388 -     12816 I
e myoLuc2.GL429784                   8892846 3 +  14577598 I
e ailMel1.GL193711.1                  155818 542 -    529242 I
e gorGor3.chr8                     121284328 8675 + 145327772 T
e equCab2.chr9                      64366131 5 +  83561422 I
e bosTau7.chr14                     63541815 7 -  81216349 I
e cavPor3.scaffold_95                5255370 1757 -   5884597 I
e canFam3.chr13                     20337317 1232 +  63241923 I
e pteVam1.scaffold_9062                53488 6 +     66173 I
e oviAri1.chr9                      68470336 7 - 100831284 I
e felCat5.chrF2                     64501899 374 +  82763536 I
e vicPac1.scaffold_13                1553546 7 +   2369290 I
e melGal1.chr3                      88078472 9551 + 100405168 I
e sarHar1.chr2_GL841388_random        481984 12896 +   1237177 I
e melUnd1.JH556481                    782640 58368 +   3508697 I
e turTru2.JH479543                     22987 50535 -    135452 I
e monDom5.chr3                     395438024 14746 + 527952102 I
e chrPic1.JH584538                    404458 7740 +   8176890 I
e galGal4.chr2                     136949488 65088 + 148809762 I

a score=440175.000000
s mm10.chr15                        56691137 44 + 104043685 TGTA---A------TAGAA--AT-CCC--CAAAGGGAATCTCCACGTTG-AATCCAA---------GA
s rn5.chr7                          97078162 45 + 143501887 tgta---a------taaaa--at-tCC--TGAAGGAGATCTCCACTTTGGAATTCAA---------GA
i rn5.chr7                         C 0 C 0
s hetGla2.JH602048                   9047916 42 -  42145720 CGTA---A------TGTAA--CTGTGC--CCTAGGGAATCT---CTTTG-AGCTTAA---------GG
i hetGla2.JH602048                 I 1 I 63
s speTri2.JH393280                  21199473 44 -  46620681 TCGG---A------TAGAC--AT-TGT--CAAAGCAGATCTCCACCTTG-ATCCTTA---------GA
i speTri2.JH393280                 I 1 I 1
s oryCun2.chr3                     137516419 45 + 155691105 TCTC---A------GGAAA--GTCTGC--CAGCTGGGAACTCCACTTGG-ATTCAGG---------GA
i oryCun2.chr3                     C 0 I 2
s hg19.chr8                        122650252 45 + 146364022 TGTA---A------TATAG--CTTTGA--AAAAGGGTATGTCTACCTTG-ATCCATA---------GA
i hg19.chr8                        I 1 I 1
s panTro4.chr8                     120287282 45 + 143986469 TGTA---A------TATAG--CTTTGA--AAAAGGGTATGTCTACCTTG-ATCCATA---------GA
i panTro4.chr8                     I 1 I 1
s ponAbe2.chr8                     129325304 45 + 153482349 TGTA---A------TATAA--CTTTGA--AAAAGGGTATGTCTACCTTG-ATCCATA---------GA
i ponAbe2.chr8                     I 1 I 2
s nomLeu2.GL397267                  35743057 45 +  48819562 TGTA---A------TATAA--CTTTGA--AAAAGGGTATGTCTACTTTG-ATCCACA---------GA
i nomLeu2.GL397267                 I 1 I 1
s rheMac3.chr8                     126564543 45 + 150158102 TGTA---A------TATAA--CTTTGA--AAAAGGGTATGTCTACCTTG-ATCCATT---------GA
i rheMac3.chr8                     I 1 I 1
s papHam1.scaffold1185                 77799 45 +    226188 TGTA---A------TATAA--Ctttga--aaaagggtatgtctaccttg-atccatt---------ga
i papHam1.scaffold1185             I 1 I 1
s calJac3.chr16                     23628045 45 -  96796970 TGTA---A------TATAA--Ctttga--taaagggtatgtctaccttg-atccata---------ga
i calJac3.chr16                    I 1 I 1
s saiBol1.JH378158                   9050050 45 -  16265076 TGTA---A------TGTAA--CTTTGA--AAAAGAGTGTGTCCACCTTG-ATCCATA---------GA
i saiBol1.JH378158                 I 1 I 1
s otoGar3.GL873523                  39379959 51 -  47749213 TGTA---ATACACGTATAA--CTCTAT--CAAAGGTGATGACTACCTTG-ATCCATC---------CC
i otoGar3.GL873523                 I 1 I 1
s tupBel1.scaffold_119809.1-330533     18198 36 +    330533 TATC---G------CAAAAGTCTTTAA--AAAACAAAA---------AA-ATCCGTG-----------
i tupBel1.scaffold_119809.1-330533 I 1 C 0
s susScr3.chr4                      18485640 45 + 143465943 TGTA---A------TAGAG--CTTTGC--CAAAGGGGATCGCCACATTG-TTCTATA---------GA
i susScr3.chr4                     I 7 C 0
s vicPac1.scaffold_13                1553553 45 +   2369290 TGTA---A------TTTGG--CTTTAC--CAAAGGGGATTTCCACATTG-TTCCATG---------GA
i vicPac1.scaffold_13              I 7 C 0
s turTru2.JH479543                     73522 45 -    135452 TGTA---A------TATAG--CTTTGC--TAAAGGGGATCTCCCCATTA-ATCCATA---------GA
i turTru2.JH479543                 I 50535 C 0
s oviAri1.chr9                      68470343 44 - 100831284 TGTA---A------TAAAA--CTTTGC--TAAACGGTCTCT-CCCAGTG-ATCCATA---------AA
i oviAri1.chr9                     I 7 C 0
s bosTau7.chr14                     63541822 44 -  81216349 TGTA---A------TAAAA--CTTTGC--TAAACGGTCTCT-CCCAGTG-ATCCATA---------AA
i bosTau7.chr14                    I 7 C 0
s equCab2.chr9                      64366136 45 +  83561422 TGTA---A------TATAA--CTTTGC--CAAAAGGGACCTCCACATTG-ATCCATA---------GA
i equCab2.chr9                     I 5 C 0
s myoLuc2.GL429784                   8892849 45 +  14577598 TGTA---A------TATAA--CTTTGC--CAAAGGGGGACTGGACACTG-GCCCACA---------GA
i myoLuc2.GL429784                 I 3 C 0
s pteVam1.scaffold_9062                53494 50 +     66173 TGTA---C------TGTAA--CTATGC--CAAAAGGGATC--GCCACC---CCCACAATGACAATTAA
i pteVam1.scaffold_9062            I 6 C 0
s sorAra1.scaffold_245118              37348 43 +     38740 TGTA---A------TATTA--CTTT----CAAAGAGGATCTCCACATTG-CTCTGTA---------GA
i sorAra1.scaffold_245118          I 5 C 0
s loxAfr3.scaffold_8                67684127 48 +  85640724 AGTATAAA------TATAA--CTTTGC--CAAAGGGGATCTCCACCTTG-ATCCCTA---------GA
i loxAfr3.scaffold_8               C 0 C 0
s proCap1.scaffold_5125                53233 48 +     62060 TGTATAAA------TATAA--CTTTGC--CCAAGGGGATTGTCACCTTG-ATCCATA---------GA
i proCap1.scaffold_5125            C 0 C 0
s triMan1.JH594628                   9783491 48 +  24477914 TGTATAAA------TATAA--CTTTGC--CAAAGGGAATCTCCACCTTG-ATCTGTA---------GA
i triMan1.JH594628                 C 0 C 0
s dasNov3.JH579962                   3296109 43 +   3334091 TG-----A-------GTAA--CCTAACTTCAAAAGGGATCTCCACCC-A-GTCCATA---------GG
i dasNov3.JH579962                 C 0 C 0
s choHof1.scaffold_1338                24262 43 +     46317 TG-----A------CATAA--CTTCAC--CAAAGGGGTTGTCCATCTGG-GTCCACG---------GA
i choHof1.scaffold_1338            C 0 C 0
e ochPri2.scaffold_3008                37098 2113 +    168654 I
e micMur1.scaffold_4913                89491 359 +    135929 M
e echTel1.scaffold_246123               4312 4388 -     12816 I
e ailMel1.GL193711.1                  155818 542 -    529242 I
e gorGor3.chr8                     121284328 8675 + 145327772 T
e cavPor3.scaffold_95                5255370 1757 -   5884597 I
e canFam3.chr13                     20337317 1232 +  63241923 I
e felCat5.chrF2                     64501899 374 +  82763536 I
e melGal1.chr3                      88078472 9551 + 100405168 I
e sarHar1.chr2_GL841388_random        481984 12896 +   1237177 I
e melUnd1.JH556481                    782640 58368 +   3508697 I
e monDom5.chr3                     395438024 14746 + 527952102 I
e chrPic1.JH584538                    404458 7740 +   8176890 I
e galGal4.chr2                     136949488 65088 + 148809762 I

a score=65011.000000
s mm10.chr15                        56691181  9 + 104043685 TAC----AGACTT
s rn5.chr7                          97078207  9 + 143501887 TAC----AGACTT
i rn5.chr7                         C 0 C 0
s hetGla2.JH602048                   9048021  9 -  42145720 TAC----AAACTC
i hetGla2.JH602048                 I 63 C 0
s cavPor3.scaffold_95                5257127  9 -   5884597 TAA----GAACTC
i cavPor3.scaffold_95              I 1757 C 0
s speTri2.JH393280                  21199518  9 -  46620681 AAA----GTGCTT
i speTri2.JH393280                 I 1 C 0
s oryCun2.chr3                     137516466  9 + 155691105 AAG----GGCTTT
i oryCun2.chr3                     I 2 C 0
s hg19.chr8                        122650298  9 + 146364022 AAA----GGACTT
i hg19.chr8                        I 1 C 0
s panTro4.chr8                     120287328  9 + 143986469 AAA----GGATTT
i panTro4.chr8                     I 1 C 0
s ponAbe2.chr8                     129325351  9 + 153482349 AAA----GGACTT
i ponAbe2.chr8                     I 2 C 0
s nomLeu2.GL397267                  35743103  9 +  48819562 AAA----GGACTT
i nomLeu2.GL397267                 I 1 C 0
s rheMac3.chr8                     126564589  9 + 150158102 AAA----GGACTT
i rheMac3.chr8                     I 1 C 0
s papHam1.scaffold1185                 77845  9 +    226188 aaa----ggactt
i papHam1.scaffold1185             I 1 C 0
s calJac3.chr16                     23628091  9 -  96796970 aaa----ggactt
i calJac3.chr16                    I 1 C 0
s saiBol1.JH378158                   9050096  9 -  16265076 AAA----GGACTC
i saiBol1.JH378158                 I 1 C 0
s otoGar3.GL873523                  39380011  8 -  47749213 AAT----GG-CTT
i otoGar3.GL873523                 I 1 C 0
s tupBel1.scaffold_119809.1-330533     18234  9 +    330533 AAA----GGTATG
i tupBel1.scaffold_119809.1-330533 C 0 C 0
s susScr3.chr4                      18485685  9 + 143465943 TAA----GGCCTT
i susScr3.chr4                     C 0 I 56
s vicPac1.scaffold_13                1553598  9 +   2369290 CAA----GGCCTT
i vicPac1.scaffold_13              C 0 I 55
s turTru2.JH479543                     73567  9 -    135452 TAA----GGCCTT
i turTru2.JH479543                 C 0 I 56
s oviAri1.chr9                      68470387  9 - 100831284 TAA----GTCCTT
i oviAri1.chr9                     C 0 I 44
s bosTau7.chr14                     63541866  9 -  81216349 TAA----GGCCTT
i bosTau7.chr14                    C 0 I 44
s equCab2.chr9                      64366181  9 +  83561422 CAA----GGGCTT
i equCab2.chr9                     C 0 I 47
s myoLuc2.GL429784                   8892894  9 +  14577598 TAA----GGGCTT
i myoLuc2.GL429784                 C 0 I 52
s pteVam1.scaffold_9062                53544  9 +     66173 TAG----AAAATA
i pteVam1.scaffold_9062            C 0 I 32
s sorAra1.scaffold_245118              37391  9 +     38740 TAT----GCACTT
i sorAra1.scaffold_245118          C 0 N 0
s loxAfr3.scaffold_8                67684177  9 +  85640724 AAA----ATTTTT
i loxAfr3.scaffold_8               C 0 C 0
s proCap1.scaffold_5125                53283 12 +     62060 GAA-TTGGTTTTT
i proCap1.scaffold_5125            C 0 C 0
s triMan1.JH594628                   9783541 13 +  24477914 AAAAAAAATTTTT
i triMan1.JH594628                 C 0 C 0
s dasNov3.JH579962                   3296154  9 +   3334091 AAT----GTAATT
i dasNov3.JH579962                 C 0 C 0
s choHof1.scaffold_1338                24307  9 +     46317 AAT----GTACTT
i choHof1.scaffold_1338            C 0 C 0
e ochPri2.scaffold_3008                37098 2113 +    168654 I
e micMur1.scaffold_4913                89491 359 +    135929 M
e echTel1.scaffold_246123               4312 4388 -     12816 I
e ailMel1.GL193711.1                  155818 542 -    529242 I
e gorGor3.chr8                     121284328 8675 + 145327772 T
e canFam3.chr13                     20337317 1232 +  63241923 I
e felCat5.chrF2                     64501899 374 +  82763536 I
e melGal1.chr3                      88078472 9551 + 100405168 I
e sarHar1.chr2_GL841388_random        481984 12896 +   1237177 I
e melUnd1.JH556481                    782640 58368 +   3508697 I
e monDom5.chr3                     395438024 14746 + 527952102 I
e chrPic1.JH584538                    404458 7740 +   8176890 I
e galGal4.chr2                     136949488 65088 + 148809762 I

a score=17902.000000
s mm10.chr15                        56691190 13 + 104043685 AATCCACAGTGCC
s rn5.chr7                          97078216 13 + 143501887 CACCCACAGTGCC
i rn5.chr7                         C 0 C 0
s hetGla2.JH602048                   9048030 13 -  42145720 AAGAGAGAATATT
i hetGla2.JH602048                 C 0 C 0
s cavPor3.scaffold_95                5257136 13 -   5884597 AAGCAAAAATGTA
i cavPor3.scaffold_95              C 0 C 0
s speTri2.JH393280                  21199527 13 -  46620681 TTCCTGCCTTGCC
i speTri2.JH393280                 C 0 I 27
s oryCun2.chr3                     137516475 13 + 155691105 CTTCCACAGTGCA
i oryCun2.chr3                     C 0 I 25
s hg19.chr8                        122650307 13 + 146364022 TCCCCAGAGTGCC
i hg19.chr8                        C 0 I 64
s panTro4.chr8                     120287337 13 + 143986469 TCCCCAGAGTGCC
i panTro4.chr8                     C 0 I 64
s ponAbe2.chr8                     129325360 13 + 153482349 TCCCCAGAGTGCC
i ponAbe2.chr8                     C 0 I 63
s nomLeu2.GL397267                  35743112 13 +  48819562 TCCCCAGAGTGCC
i nomLeu2.GL397267                 C 0 I 60
s rheMac3.chr8                     126564598 13 + 150158102 CCCCCAGAGTGCT
i rheMac3.chr8                     C 0 I 60
s papHam1.scaffold1185                 77854 13 +    226188 cccccagagtgct
i papHam1.scaffold1185             C 0 I 59
s calJac3.chr16                     23628100 13 -  96796970 tccccacagtgcc
i calJac3.chr16                    C 0 I 57
s saiBol1.JH378158                   9050105 13 -  16265076 TCCCCACAGTGCC
i saiBol1.JH378158                 C 0 I 59
s otoGar3.GL873523                  39380019 13 -  47749213 TTACTTTAGTGCC
i otoGar3.GL873523                 C 0 I 66
s tupBel1.scaffold_119809.1-330533     18243  1 +    330533 T------------
i tupBel1.scaffold_119809.1-330533 C 0 I 29
s susScr3.chr4                      18485750  6 + 143465943 -------AATTCA
i susScr3.chr4                     I 56 I 15
s vicPac1.scaffold_13                1553662  6 +   2369290 -------AATTCA
i vicPac1.scaffold_13              I 55 I 16
s turTru2.JH479543                     73632  6 -    135452 -------AATTCA
i turTru2.JH479543                 I 56 I 15
s oviAri1.chr9                      68470440  6 - 100831284 -------AATTCA
i oviAri1.chr9                     I 44 I 14
s bosTau7.chr14                     63541919  6 -  81216349 -------AATTCA
i bosTau7.chr14                    I 44 I 14
s equCab2.chr9                      64366237  6 +  83561422 -------AATTTA
i equCab2.chr9                     I 47 I 17
s myoLuc2.GL429784                   8892955  6 +  14577598 -------ATTTCA
i myoLuc2.GL429784                 I 52 I 18
s pteVam1.scaffold_9062                53585  6 +     66173 -------AACTCA
i pteVam1.scaffold_9062            I 32 I 15
s loxAfr3.scaffold_8                67684186 13 +  85640724 CCCCCACAACGGC
i loxAfr3.scaffold_8               C 0 C 0
s proCap1.scaffold_5125                53295 13 +     62060 GTCCCACAATGGC
i proCap1.scaffold_5125            C 0 C 0
s triMan1.JH594628                   9783554 13 +  24477914 TCCCCACAATGGC
i triMan1.JH594628                 C 0 C 0
s dasNov3.JH579962                   3296163 13 +   3334091 TCCCCACAGTGCT
i dasNov3.JH579962                 C 0 C 0
s choHof1.scaffold_1338                24316 10 +     46317 TCCCTTCAGT---
i choHof1.scaffold_1338            C 0 C 0
e ochPri2.scaffold_3008                37098 2113 +    168654 I
e micMur1.scaffold_4913                89491 359 +    135929 M
e echTel1.scaffold_246123               4312 4388 -     12816 I
e ailMel1.GL193711.1                  155818 542 -    529242 I
e gorGor3.chr8                     121284328 8675 + 145327772 T
e canFam3.chr13                     20337317 1232 +  63241923 I
e felCat5.chrF2                     64501899 374 +  82763536 I
e melGal1.chr3                      88078472 9551 + 100405168 I
e sarHar1.chr2_GL841388_random        481984 12896 +   1237177 I
e melUnd1.JH556481                    782640 58368 +   3508697 I
e monDom5.chr3                     395438024 14746 + 527952102 I
e chrPic1.JH584538                    404458 7740 +   8176890 I
e galGal4.chr2                     136949488 65088 + 148809762 I

a score=-51236.000000
s mm10.chr15                        56691203  8 + 104043685 AAAAA----A------TC----------
s rn5.chr7                          97078229 12 + 143501887 AAAAA----AAAAA--TC----------
i rn5.chr7                         C 0 C 0
s dipOrd1.scaffold_76283                 392  8 +      5145 AAAAA----A------TT----------
i dipOrd1.scaffold_76283           N 0 C 0
s hetGla2.JH602048                   9048043 11 -  42145720 -GAACAAAAA------TC----------
i hetGla2.JH602048                 C 0 C 0
s cavPor3.scaffold_95                5257149  7 -   5884597 -AGAC----A------TT----------
i cavPor3.scaffold_95              C 0 C 0
s speTri2.JH393280                  21199567  8 -  46620681 AAAAG----G------TA----------
i speTri2.JH393280                 I 27 C 0
s oryCun2.chr3                     137516513  8 + 155691105 GAAAG----A------TA----------
i oryCun2.chr3                     I 25 C 0
s hg19.chr8                        122650384  8 + 146364022 TAAAA----A------TC----------
i hg19.chr8                        I 64 C 0
s panTro4.chr8                     120287414  8 + 143986469 TAAAA----A------TC----------
i panTro4.chr8                     I 64 C 0
s ponAbe2.chr8                     129325436  8 + 153482349 TAAAA----A------TC----------
i ponAbe2.chr8                     I 63 C 0
s nomLeu2.GL397267                  35743185  8 +  48819562 AAAAA----A------TC----------
i nomLeu2.GL397267                 I 60 C 0
s rheMac3.chr8                     126564671 14 + 150158102 aaaaa----aaaaaattC----------
i rheMac3.chr8                     I 60 C 0
s papHam1.scaffold1185                 77926 14 +    226188 aaaaa----aaaaaattC----------
i papHam1.scaffold1185             I 59 C 0
s calJac3.chr16                     23628170  8 -  96796970 AAAAC----G------TC----------
i calJac3.chr16                    I 57 C 0
s saiBol1.JH378158                   9050177  8 -  16265076 AAAAC----G------TC----------
i saiBol1.JH378158                 I 59 C 0
s otoGar3.GL873523                  39380098  8 -  47749213 TAGAA----A------TC----------
i otoGar3.GL873523                 I 66 C 0
s tupBel1.scaffold_119809.1-330533     18273  8 +    330533 AAGAA----A------TC----------
i tupBel1.scaffold_119809.1-330533 I 29 C 0
s susScr3.chr4                      18485771  8 + 143465943 AAAAA----A------TC----------
i susScr3.chr4                     I 15 C 0
s vicPac1.scaffold_13                1553684  8 +   2369290 AAAAA----A------TC----------
i vicPac1.scaffold_13              I 16 C 0
s turTru2.JH479543                     73653  8 -    135452 AAATA----A------AC----------
i turTru2.JH479543                 I 15 C 0
s oviAri1.chr9                      68470460  8 - 100831284 AAACA----A------TC----------
i oviAri1.chr9                     I 14 C 0
s bosTau7.chr14                     63541939  8 -  81216349 AAACA----A------TC----------
i bosTau7.chr14                    I 14 C 0
s equCab2.chr9                      64366260  8 +  83561422 AAGAG----A------TC----------
i equCab2.chr9                     I 17 C 0
s myoLuc2.GL429784                   8892979  8 +  14577598 AAGAA----A------TC----------
i myoLuc2.GL429784                 I 18 C 0
s pteVam1.scaffold_9062                53606  8 +     66173 aataa----a------tt----------
i pteVam1.scaffold_9062            I 15 C 0
s loxAfr3.scaffold_8                67684199 14 +  85640724 ----A----A------TAATAGATAATA
i loxAfr3.scaffold_8               C 0 I 61
s proCap1.scaffold_5125                53308 11 +     62060 ----A----A------AAATAG---ATA
i proCap1.scaffold_5125            C 0 I 64
s triMan1.JH594628                   9783567 14 +  24477914 ----A----A------TAATAGATAATA
i triMan1.JH594628                 C 0 I 64
s dasNov3.JH579962                   3296176  5 +   3334091 ----A----A------TAC---------
i dasNov3.JH579962                 C 0 I 3
s choHof1.scaffold_1338                24326  4 +     46317 ---------G------CCC---------
i choHof1.scaffold_1338            C 0 I 3
e ochPri2.scaffold_3008                37098 2113 +    168654 I
e micMur1.scaffold_4913                89491 359 +    135929 M
e echTel1.scaffold_246123               4312 4388 -     12816 I
e ailMel1.GL193711.1                  155818 542 -    529242 I
e gorGor3.chr8                     121284328 8675 + 145327772 T
e canFam3.chr13                     20337317 1232 +  63241923 I
e felCat5.chrF2                     64501899 374 +  82763536 I
e melGal1.chr3                      88078472 9551 + 100405168 I
e sarHar1.chr2_GL841388_random        481984 12896 +   1237177 I
e melUnd1.JH556481                    782640 58368 +   3508697 I
e monDom5.chr3                     395438024 14746 + 527952102 I
e chrPic1.JH584538                    404458 7740 +   8176890 I
e galGal4.chr2                     136949488 65088 + 148809762 I

a score=33259.000000
s mm10.chr15                        56691211 3 + 104043685 TTG
s rn5.chr7                          97078241 3 + 143501887 TTT
i rn5.chr7                         C 0 C 0
s dipOrd1.scaffold_76283                 400 3 +      5145 ATA
i dipOrd1.scaffold_76283           C 0 C 0
s hetGla2.JH602048                   9048054 3 -  42145720 TCT
i hetGla2.JH602048                 C 0 C 0
s cavPor3.scaffold_95                5257156 3 -   5884597 TCT
i cavPor3.scaffold_95              C 0 C 0
s speTri2.JH393280                  21199575 3 -  46620681 TGT
i speTri2.JH393280                 C 0 C 0
s oryCun2.chr3                     137516521 3 + 155691105 TAT
i oryCun2.chr3                     C 0 C 0
s hg19.chr8                        122650392 3 + 146364022 TTA
i hg19.chr8                        C 0 C 0
s panTro4.chr8                     120287422 3 + 143986469 TTA
i panTro4.chr8                     C 0 C 0
s ponAbe2.chr8                     129325444 3 + 153482349 TTA
i ponAbe2.chr8                     C 0 C 0
s nomLeu2.GL397267                  35743193 3 +  48819562 TTA
i nomLeu2.GL397267                 C 0 C 0
s rheMac3.chr8                     126564685 3 + 150158102 TTA
i rheMac3.chr8                     C 0 C 0
s papHam1.scaffold1185                 77940 3 +    226188 TTA
i papHam1.scaffold1185             C 0 C 0
s calJac3.chr16                     23628178 3 -  96796970 ATA
i calJac3.chr16                    C 0 C 0
s saiBol1.JH378158                   9050185 3 -  16265076 TTA
i saiBol1.JH378158                 C 0 C 0
s otoGar3.GL873523                  39380106 3 -  47749213 TTG
i otoGar3.GL873523                 C 0 C 0
s tupBel1.scaffold_119809.1-330533     18281 3 +    330533 ATT
i tupBel1.scaffold_119809.1-330533 C 0 C 0
s susScr3.chr4                      18485779 3 + 143465943 TTA
i susScr3.chr4                     C 0 C 0
s vicPac1.scaffold_13                1553692 3 +   2369290 TTA
i vicPac1.scaffold_13              C 0 C 0
s turTru2.JH479543                     73661 3 -    135452 TTA
i turTru2.JH479543                 C 0 C 0
s oviAri1.chr9                      68470468 3 - 100831284 TCA
i oviAri1.chr9                     C 0 C 0
s bosTau7.chr14                     63541947 3 -  81216349 TCA
i bosTau7.chr14                    C 0 C 0
s equCab2.chr9                      64366268 3 +  83561422 TTA
i equCab2.chr9                     C 0 C 0
s myoLuc2.GL429784                   8892987 3 +  14577598 TTA
i myoLuc2.GL429784                 C 0 C 0
s pteVam1.scaffold_9062                53614 3 +     66173 tta
i pteVam1.scaffold_9062            C 0 C 0
s loxAfr3.scaffold_8                67684274 3 +  85640724 TTA
i loxAfr3.scaffold_8               I 61 C 0
s proCap1.scaffold_5125                53383 3 +     62060 TTT
i proCap1.scaffold_5125            I 64 C 0
s echTel1.scaffold_246123               8700 3 -     12816 TTA
i echTel1.scaffold_246123          I 4388 C 0
s triMan1.JH594628                   9783645 3 +  24477914 TTA
i triMan1.JH594628                 I 64 C 0
s dasNov3.JH579962                   3296184 3 +   3334091 ATA
i dasNov3.JH579962                 I 3 C 0
s choHof1.scaffold_1338                24333 3 +     46317 GTA
i choHof1.scaffold_1338            I 3 C 0
e ochPri2.scaffold_3008                37098 2113 +    168654 I
e micMur1.scaffold_4913                89491 359 +    135929 M
e ailMel1.GL193711.1                  155818 542 -    529242 I
e gorGor3.chr8                     121284328 8675 + 145327772 T
e canFam3.chr13                     20337317 1232 +  63241923 I
e felCat5.chrF2                     64501899 374 +  82763536 I
e melGal1.chr3                      88078472 9551 + 100405168 I
e sarHar1.chr2_GL841388_random        481984 12896 +   1237177 I
e melUnd1.JH556481                    782640 58368 +   3508697 I
e monDom5.chr3                     395438024 14746 + 527952102 I
e chrPic1.JH584538                    404458 7740 +   8176890 I
e galGal4.chr2                     136949488 65088 + 148809762 I

a score=93966.000000
s mm10.chr15                        56691214 31 + 104043685 GTT----------------------GGTACA-GAT-----------------AACGCAAAA-------GGAAAG-GT------------------------------------AA
s rn5.chr7                          97078244 26 + 143501887 GTT----------------------GGTACA-GAT-----------------AGCAC------------CAATG-GT------------------------------------AA
i rn5.chr7                         C 0 C 0
s dipOrd1.scaffold_76283                 403 31 +      5145 TTG----------------------AAAACA-GAA-----------------ACTGCATAT-------GGTAAA-GT------------------------------------AT
i dipOrd1.scaffold_76283           C 0 C 0
s hetGla2.JH602048                   9048057 25 -  42145720 GTT----------------------GATACA-GAG-----------------ACCCTATAT--------------GT------------------------------------AT
i hetGla2.JH602048                 C 0 C 0
s cavPor3.scaffold_95                5257159 31 -   5884597 GTT----------------------GGTACA-GAG-----------------ACCCTATAT-------GTAACG-GT------------------------------------AT
i cavPor3.scaffold_95              C 0 C 0
s speTri2.JH393280                  21199578 44 -  46620681 GTTTTAAAATTTCAGA---------AACAAA-AAC-----------------ATTTTAAAA-------GAAATC-TT------------------------------------AG
i speTri2.JH393280                 C 0 C 0
s oryCun2.chr3                     137516524 60 + 155691105 GTTTAAAAATTCAAGAAAATATTTTAAAATA-AAT-----------------CCTTTCCATCAGGTGTGGAAAA-AT------------------------------------AT
i oryCun2.chr3                     C 0 C 0
s hg19.chr8                        122650395 31 + 146364022 CCT----------------------AGTAAG-GAA-----------------ACCATGTAT-------GGGAAA-GT------------------------------------AT
i hg19.chr8                        C 0 C 0
s panTro4.chr8                     120287425 31 + 143986469 CCT----------------------AGTAAG-GAA-----------------ACCATGTAT-------GGGAAA-GT------------------------------------AT
i panTro4.chr8                     C 0 C 0
s ponAbe2.chr8                     129325447 31 + 153482349 CCT----------------------AGTAAG-GAA-----------------ACCATGTAT-------GGGAAA-GT------------------------------------AT
i ponAbe2.chr8                     C 0 C 0
s nomLeu2.GL397267                  35743196 31 +  48819562 CCT----------------------AGTAAG-GAA-----------------ACCATGTAT-------GGGAAA-GT------------------------------------AT
i nomLeu2.GL397267                 C 0 C 0
s rheMac3.chr8                     126564688 31 + 150158102 CCT----------------------GGTAAG-GAA-----------------ACCATGTAT-------GGGAAA-GT------------------------------------AT
i rheMac3.chr8                     C 0 C 0
s papHam1.scaffold1185                 77943 31 +    226188 CCT----------------------GGTAAG-GAA-----------------ACCATGTAT-------GGGAAA-GT------------------------------------AT
i papHam1.scaffold1185             C 0 C 0
s calJac3.chr16                     23628181 31 -  96796970 CCC----------------------GGTAAG-GAA-----------------ACCGTGTGT-------GGGAAA-GT------------------------------------AT
i calJac3.chr16                    C 0 C 0
s saiBol1.JH378158                   9050188 31 -  16265076 CCT----------------------GGTAAG-GAA-----------------ACCATGTAT-------GGGAAA-GT------------------------------------AT
i saiBol1.JH378158                 C 0 C 0
s otoGar3.GL873523                  39380109 29 -  47749213 GCT----------------------GGTAAG-AAA-----------------AC--GGTAT-------GGAAGG-GT------------------------------------AC
i otoGar3.GL873523                 C 0 C 0
s tupBel1.scaffold_119809.1-330533     18284 31 +    330533 GCT----------------------GATAGG-GAA-----------------AACATTCAT-------GAAAAA-TC------------------------------------AT
i tupBel1.scaffold_119809.1-330533 C 0 C 0
s susScr3.chr4                      18485782 31 + 143465943 GCT----------------------GAGAAG-GAA-----------------ACCCTGTGT-------GAAAAA-AT------------------------------------AT
i susScr3.chr4                     C 0 C 0
s vicPac1.scaffold_13                1553695 30 +   2369290 GCT----------------------GGTAAG-GAA-----------------ACCATGTGT-------GAAAGG-C-------------------------------------AT
i vicPac1.scaffold_13              C 0 C 0
s turTru2.JH479543                     73664 31 -    135452 GCT----------------------GATAAG-GAA-----------------ACCATGGGC-------AAAAAA-AT------------------------------------AT
i turTru2.JH479543                 C 0 C 0
s oviAri1.chr9                      68470471 31 - 100831284 GTT----------------------GGTAAG-GAA-----------------TCCATGTGT-------GAAAAA-AG------------------------------------AA
i oviAri1.chr9                     C 0 C 0
s bosTau7.chr14                     63541950 30 -  81216349 GTT----------------------GGTAAG-GAA-----------------TCCATGTAT-------GAAAAA-A-------------------------------------AA
i bosTau7.chr14                    C 0 C 0
s ailMel1.GL193711.1                  156360 31 -    529242 GCT----------------------GGTATG-GAA-----------------ACCATGTAT-------AAAAAA-GT------------------------------------GT
i ailMel1.GL193711.1               I 542 C 0
s equCab2.chr9                      64366271 24 +  83561422 --------------------------GT-TG-GAA-----------------A--ATGTGT-------GAAAAG-GT------------------------------------AT
i equCab2.chr9                     C 0 C 0
s myoLuc2.GL429784                   8892990 31 +  14577598 GCT----------------------GGTAAG-GAA-----------------ACCATCTGT-------GAAAAA-GT------------------------------------AT
i myoLuc2.GL429784                 C 0 C 0
s pteVam1.scaffold_9062                53617 29 +     66173 aCT----------------------GGTAAG-GAA-----------------ACCA--TGT-------GATAAA-GT------------------------------------AG
i pteVam1.scaffold_9062            C 0 C 0
s loxAfr3.scaffold_8                67684277 32 +  85640724 GCT----------------------GATAAGAAAA-----------------ATCATGTGT-------GAAAAA-GT------------------------------------AT
i loxAfr3.scaffold_8               C 0 C 0
s proCap1.scaffold_5125                53386 28 +     62060 TTT----------------------AGTTGGTAAA-----------------ATTATGTCT-------GGAAAG-----------------------------------------
i proCap1.scaffold_5125            C 0 C 0
s echTel1.scaffold_246123               8703 31 -     12816 GGT----------------------GATAAG-GAA-----------------ATCTTATGT-------GAGAAA-AT------------------------------------AT
i echTel1.scaffold_246123          C 0 C 0
s triMan1.JH594628                   9783648 32 +  24477914 GCT----------------------GATAAG-AAA-----------------CTCTTGTGT-------GAAAAAAGT------------------------------------AT
i triMan1.JH594628                 C 0 C 0
s dasNov3.JH579962                   3296187 86 +   3334091 ATG----------------------AATGAATGAAAAGCATAAAATCTATGTTTAAAATTT-------CAAGAAAATTTGGTTTTAGAAATAACTGTACCTGGTAAGGAAACCAT
i dasNov3.JH579962                 C 0 C 0
s choHof1.scaffold_1338                24336 23 +     46317 GAT----------------------AATGAATGAA-------------------------T-------GATGAAAGT--------------------------------------
i choHof1.scaffold_1338            C 0 C 0
e ochPri2.scaffold_3008                37098 2113 +    168654 I
e micMur1.scaffold_4913                89491 359 +    135929 M
e gorGor3.chr8                     121284328 8675 + 145327772 T
e canFam3.chr13                     20337317 1232 +  63241923 I
e felCat5.chrF2                     64501899 374 +  82763536 I
e melGal1.chr3                      88078472 9551 + 100405168 I
e sarHar1.chr2_GL841388_random        481984 12896 +   1237177 I
e melUnd1.JH556481                    782640 58368 +   3508697 I
e monDom5.chr3                     395438024 14746 + 527952102 I
e chrPic1.JH584538                    404458 7740 +   8176890 I
e galGal4.chr2                     136949488 65088 + 148809762 I

a score=230269.000000
s mm10.chr15                        56691245 8 + 104043685 TTATGAAA
s rn5.chr7                          97078270 8 + 143501887 TTCTGAAA
i rn5.chr7                         C 0 C 0
s dipOrd1.scaffold_76283                 434 8 +      5145 TTATGAAA
i dipOrd1.scaffold_76283           C 0 C 0
s hetGla2.JH602048                   9048082 8 -  42145720 TTATGAAA
i hetGla2.JH602048                 C 0 C 0
s cavPor3.scaffold_95                5257190 8 -   5884597 TTGTGAAA
i cavPor3.scaffold_95              C 0 C 0
s speTri2.JH393280                  21199622 8 -  46620681 TTCACAAA
i speTri2.JH393280                 C 0 C 0
s oryCun2.chr3                     137516584 8 + 155691105 TTATGGTA
i oryCun2.chr3                     C 0 C 0
s hg19.chr8                        122650426 8 + 146364022 TTATGAAA
i hg19.chr8                        C 0 C 0
s panTro4.chr8                     120287456 8 + 143986469 TTATGAAA
i panTro4.chr8                     C 0 C 0
s ponAbe2.chr8                     129325478 8 + 153482349 TTATGAAA
i ponAbe2.chr8                     C 0 C 0
s nomLeu2.GL397267                  35743227 8 +  48819562 TTATGAAA
i nomLeu2.GL397267                 C 0 C 0
s rheMac3.chr8                     126564719 8 + 150158102 TTATGAAA
i rheMac3.chr8                     C 0 C 0
s papHam1.scaffold1185                 77974 8 +    226188 TTATGAAA
i papHam1.scaffold1185             C 0 C 0
s calJac3.chr16                     23628212 8 -  96796970 TTATGAAA
i calJac3.chr16                    C 0 C 0
s saiBol1.JH378158                   9050219 8 -  16265076 TTATGAAA
i saiBol1.JH378158                 C 0 C 0
s otoGar3.GL873523                  39380138 8 -  47749213 TTACGAGA
i otoGar3.GL873523                 C 0 C 0
s tupBel1.scaffold_119809.1-330533     18315 8 +    330533 TTATGAAA
i tupBel1.scaffold_119809.1-330533 C 0 C 0
s susScr3.chr4                      18485813 8 + 143465943 ATATGAAA
i susScr3.chr4                     C 0 C 0
s vicPac1.scaffold_13                1553725 8 +   2369290 TTATGAAA
i vicPac1.scaffold_13              C 0 C 0
s turTru2.JH479543                     73695 8 -    135452 TTATGAAA
i turTru2.JH479543                 C 0 C 0
s oviAri1.chr9                      68470502 8 - 100831284 ATTTGAAA
i oviAri1.chr9                     C 0 C 0
s bosTau7.chr14                     63541980 8 -  81216349 TTTTGAAA
i bosTau7.chr14                    C 0 C 0
s felCat5.chrF2                     64502273 8 +  82763536 TTATGAAA
i felCat5.chrF2                    I 374 C 0
s ailMel1.GL193711.1                  156391 8 -    529242 TTACAAAA
i ailMel1.GL193711.1               C 0 C 0
s equCab2.chr9                      64366295 8 +  83561422 TTATGAAA
i equCab2.chr9                     C 0 C 0
s myoLuc2.GL429784                   8893021 8 +  14577598 TCATGAAA
i myoLuc2.GL429784                 C 0 C 0
s pteVam1.scaffold_9062                53646 8 +     66173 TCATGAAA
i pteVam1.scaffold_9062            C 0 C 0
s loxAfr3.scaffold_8                67684309 8 +  85640724 TTATAAGA
i loxAfr3.scaffold_8               C 0 C 0
s proCap1.scaffold_5125                53414 7 +     62060 -TATAGGA
i proCap1.scaffold_5125            C 0 C 0
s echTel1.scaffold_246123               8734 8 -     12816 TCACAGGA
i echTel1.scaffold_246123          C 0 C 0
s triMan1.JH594628                   9783680 8 +  24477914 TCATAGGA
i triMan1.JH594628                 C 0 C 0
s dasNov3.JH579962                   3296273 8 +   3334091 GTGTAAAA
i dasNov3.JH579962                 C 0 I 15
s choHof1.scaffold_1338                24359 7 +     46317 -TGTAAAA
i choHof1.scaffold_1338            C 0 I 140
e ochPri2.scaffold_3008                37098 2113 +    168654 I
e micMur1.scaffold_4913                89491 359 +    135929 M
e gorGor3.chr8                     121284328 8675 + 145327772 T
e canFam3.chr13                     20337317 1232 +  63241923 I
e melGal1.chr3                      88078472 9551 + 100405168 I
e sarHar1.chr2_GL841388_random        481984 12896 +   1237177 I
e melUnd1.JH556481                    782640 58368 +   3508697 I
e monDom5.chr3                     395438024 14746 + 527952102 I
e chrPic1.JH584538                    404458 7740 +   8176890 I
e galGal4.chr2                     136949488 65088 + 148809762 I

a score=305694.000000
s mm10.chr15                        56691253 16 + 104043685 CTCAGTGCT-------GTGA----AG-------T
s rn5.chr7                          97078278 16 + 143501887 CTCAGTGTT-------GGGA----CG-------A
i rn5.chr7                         C 0 C 0
s dipOrd1.scaffold_76283                 442 16 +      5145 TTCAGTATT-------GTGG----AG-------T
i dipOrd1.scaffold_76283           C 0 C 0
s hetGla2.JH602048                   9048090 16 -  42145720 CTAAATATT-------GTAT----GG-------C
i hetGla2.JH602048                 C 0 C 0
s cavPor3.scaffold_95                5257198 16 -   5884597 CTCAGTATT-------ACGT----GG-------C
i cavPor3.scaffold_95              C 0 C 0
s speTri2.JH393280                  21199630 22 -  46620681 GACA-TCCT-------GCAG----AGAAAAGTAC
i speTri2.JH393280                 C 0 C 0
s oryCun2.chr3                     137516592 16 + 155691105 TTCAATTTA-------GTGG----TG-------C
i oryCun2.chr3                     C 0 C 0
s hg19.chr8                        122650434 16 + 146364022 TTCAATACT-------ATGG----GG-------C
i hg19.chr8                        C 0 C 0
s panTro4.chr8                     120287464 16 + 143986469 TTCAATACT-------ATGG----GG-------C
i panTro4.chr8                     C 0 C 0
s ponAbe2.chr8                     129325486 16 + 153482349 TTCAATACT-------ATGG----GG-------C
i ponAbe2.chr8                     C 0 C 0
s nomLeu2.GL397267                  35743235 16 +  48819562 TTCAATACT-------ATGG----GG-------C
i nomLeu2.GL397267                 C 0 C 0
s rheMac3.chr8                     126564727 16 + 150158102 TTCAATACT-------ATGG----GG-------C
i rheMac3.chr8                     C 0 C 0
s papHam1.scaffold1185                 77982 16 +    226188 TTCAATACT-------ATGG----GG-------C
i papHam1.scaffold1185             C 0 C 0
s calJac3.chr16                     23628220 16 -  96796970 ATCAATACT-------AAGG----GG-------C
i calJac3.chr16                    C 0 C 0
s saiBol1.JH378158                   9050227 16 -  16265076 ATCAATACT-------ATGG----GG-------C
i saiBol1.JH378158                 C 0 C 0
s otoGar3.GL873523                  39380146 16 -  47749213 TTCAATATC-------ATGG----TG-------T
i otoGar3.GL873523                 C 0 C 0
s tupBel1.scaffold_119809.1-330533     18323 16 +    330533 TTCAATACT-------GTGA----GG-------C
i tupBel1.scaffold_119809.1-330533 C 0 C 0
s susScr3.chr4                      18485821 16 + 143465943 TCCAAAAGC-------ATGG----AA-------C
i susScr3.chr4                     C 0 C 0
s vicPac1.scaffold_13                1553733 20 +   2369290 TTCAATATT-------GTGGAACTAA-------C
i vicPac1.scaffold_13              C 0 C 0
s turTru2.JH479543                     73703 16 -    135452 TTCAACATC-------GTGG----GA-------C
i turTru2.JH479543                 C 0 C 0
s oviAri1.chr9                      68470510 16 - 100831284 TTCAATATT-------TTGG----GA-------C
i oviAri1.chr9                     C 0 C 0
s bosTau7.chr14                     63541988 16 -  81216349 TTCAATATT-------GTGG----GA-------C
i bosTau7.chr14                    C 0 C 0
s felCat5.chrF2                     64502281 16 +  82763536 TTCAAAACT-------GTGA----GG-------C
i felCat5.chrF2                    C 0 C 0
s ailMel1.GL193711.1                  156399 16 -    529242 TTCAAAACT-------AGAA----GG-------C
i ailMel1.GL193711.1               C 0 C 0
s equCab2.chr9                      64366303 16 +  83561422 TTCAATATT-------GTGG----GG-------C
i equCab2.chr9                     C 0 C 0
s myoLuc2.GL429784                   8893029 16 +  14577598 TTCTACATT-------GTGG----GG-------C
i myoLuc2.GL429784                 C 0 C 0
s pteVam1.scaffold_9062                53654 16 +     66173 TTCAATATT-------GTGG----GG-------T
i pteVam1.scaffold_9062            C 0 C 0
s loxAfr3.scaffold_8                67684317 16 +  85640724 TTCAGTGTT-------GTGA----GG-------T
i loxAfr3.scaffold_8               C 0 C 0
s proCap1.scaffold_5125                53421 16 +     62060 TTCAGTATT-------GTGA----GG-------T
i proCap1.scaffold_5125            C 0 C 0
s echTel1.scaffold_246123               8742 16 -     12816 TTCAATACT-------ATGA----GG-------T
i echTel1.scaffold_246123          C 0 C 0
s triMan1.JH594628                   9783688 16 +  24477914 TTCAATATT-------GTGA----GG-------T
i triMan1.JH594628                 C 0 C 0
s dasNov3.JH579962                   3296296 23 +   3334091 TTCAATAATGGTGGGGGGGG----GG-------C
i dasNov3.JH579962                 I 15 C 0
e ochPri2.scaffold_3008                37098 2113 +    168654 I
e choHof1.scaffold_1338                24366 140 +     46317 I
e micMur1.scaffold_4913                89491 359 +    135929 M
e gorGor3.chr8                     121284328 8675 + 145327772 T
e canFam3.chr13                     20337317 1232 +  63241923 I
e melGal1.chr3                      88078472 9551 + 100405168 I
e sarHar1.chr2_GL841388_random        481984 12896 +   1237177 I
e melUnd1.JH556481                    782640 58368 +   3508697 I
e monDom5.chr3                     395438024 14746 + 527952102 I
e chrPic1.JH584538                    404458 7740 +   8176890 I
e galGal4.chr2                     136949488 65088 + 148809762 I

a score=1307584.000000
s mm10.chr15                        56691269 78 + 104043685 TACAT--CCTACA----GAGTC--AACAACA-GAG-AG-TAC-GGCAAGCTAACTTGC-TGTCTAGTAACTATTATCTCTT----AATCACCCAT
s rn5.chr7                          97078294 61 + 143501887 GACAT--CCTGTA----GAGTC--AACAA----GG-AG-AAA-AGCAACCTAATTTAC-TCTCTAGTAACTGT------------------CTCT
i rn5.chr7                         C 0 C 0
s dipOrd1.scaffold_76283                 458 59 +      5145 TATAG--CCCAGA----AACTC--A--------------------CACGCTAACTTAC-TTTCTAGTAGTAGC---TTCTT----GTTCATTTGT
i dipOrd1.scaffold_76283           C 0 C 0
s hetGla2.JH602048                   9048106 43 -  42145720 TATAT--CTCATA----GACTT--AACAAAA-AAA-TT-CAT-TCCAAGCTAACT----------------------------------------
i hetGla2.JH602048                 C 0 C 0
s cavPor3.scaffold_95                5257214 74 -   5884597 TGTAT--CTTACA----GATCT--AACAAAA-AAAGTT-CAT-TCCAAGCTAACTTAC-TTTCTAGTAA--GT---TTCTT----ATTCATTTCT
i cavPor3.scaffold_95              C 0 C 0
s speTri2.JH393280                  21199652 76 -  46620681 TATAT--CCTAAA----GACCT--AACAAAA-ATG-AT-CATGTCCAAGCTAATTTAC-TTTCTACAAACAGC---TTTTT----ATTGGTTTCT
i speTri2.JH393280                 C 0 C 0
s oryCun2.chr3                     137516608 76 + 155691105 TATAT--TCTGTA----GACCT--AGCCAAA-ATT-AT-TAACTTCAAGCTAACTTAC-TTTCTAGTAACAGC---TTCTT----ACTCATTTGC
i oryCun2.chr3                     C 0 C 0
s hg19.chr8                        122650450 75 + 146364022 TATAT--TCTACA----GACCT--AACAAAA-ATG-AG-TGGTTCC-AACTAACTTAC-TTTCTAGTAACAGT---TTCTT----ATTCACTTGT
i hg19.chr8                        C 0 C 0
s panTro4.chr8                     120287480 75 + 143986469 TATAT--TCTACA----GACCT--AACAAAA-ATG-AG-TGGTTCC-AACTAACTTAC-TTTCTAGTAACAGT---TTCTT----ATTCACTTGT
i panTro4.chr8                     C 0 C 0
s ponAbe2.chr8                     129325502 75 + 153482349 TATAT--TCTACA----GACCT--AACAAAA-ATG-AG-TGGTTTC-AACTAACTTAC-TTTCTAGTAACAGT---TTCTT----ACTCACTTGT
i ponAbe2.chr8                     C 0 C 0
s nomLeu2.GL397267                  35743251 75 +  48819562 TATAT--TCTACA----GACCT--AACAAAA-ATG-AG-TGGTTCC-AATTAACTTAC-TTTCTAGTAACAGT---TTCTT----ACTCACTTGT
i nomLeu2.GL397267                 C 0 C 0
s rheMac3.chr8                     126564743 75 + 150158102 TATAT--TCTACA----GACCT--AACAAAA-ACG-AG-TGGTTCC-AACTAACTTAC-TTTCTAGTAACAGT---TTCTT----ACTCACTTGT
i rheMac3.chr8                     C 0 C 0
s papHam1.scaffold1185                 77998 75 +    226188 TATAT--TCTACA----GACCT--AACAAAA-ACG-AG-TGGTTCC-AACTAACTTAC-TTTCTAGTAACAGT---TTCTT----ATTCACTTGT
i papHam1.scaffold1185             C 0 C 0
s calJac3.chr16                     23628236 74 -  96796970 TATAT--TCTATA----GACCT--AGCAAAA-ATG-AC-TGGTTCCAAACTAACTTAC-TCTCTGGT-ACAGT---GTCTT-----CTTACTTGT
i calJac3.chr16                    C 0 C 0
s saiBol1.JH378158                   9050243 76 -  16265076 TATAT--TCTATA----GACCT--AACAAAA-ATG-AC-TGGTTCCAAACTAACTTAC-TTTCTAGTAACAGT---GTCTT----ACTCACTTGT
i saiBol1.JH378158                 C 0 C 0
s micMur1.scaffold_4913                89860 78 +    135929 TATAT--TCTATA----GACTT--AACAAAATATG-ATGTAGTTCCAAGCTAACTTAG-TTTCTAGTAACAGT---GTCTT----ATTTATTTGT
i micMur1.scaffold_4913            M 359 C 0
s otoGar3.GL873523                  39380162 75 -  47749213 -ATAT--TCCATA----GACTT--AACATAA-ATC-AT-TAGTTCCGAGCTGACTTAA-CTTTTAGTAACAGT---TTCTT----ACTTATCTGT
i otoGar3.GL873523                 C 0 C 0
s tupBel1.scaffold_119809.1-330533     18339 75 +    330533 TATAT--TCTATA----GACCT--AACACAA-ATG-AT-TAGCTCCAAGCTAACTTAC-TTTCTAGTAACAGT----TCTT----ACTCATTTGT
i tupBel1.scaffold_119809.1-330533 C 0 C 0
s susScr3.chr4                      18485837 72 + 143465943 --TTT--TCCACG----GACTT--AACCGTA-ATG-AT-TAGCTTCAATATAACCTAC-TTTCTAGTA--AGA---CTCTT----ACCCATTTGT
i susScr3.chr4                     C 0 C 0
s vicPac1.scaffold_13                1553753 69 +   2369290 --TAT--TCTACA----GACCT--AAC---A-ATG-AT-TAGTTTCAGTATGACTTAC-TTTCTAGTA--AGT---TTCTT----ACTCATTTGT
i vicPac1.scaffold_13              C 0 C 0
s turTru2.JH479543                     73719 72 -    135452 --TAT--TCTACA----GACTT--AACATTA-ACG-AT-TAGTTTCAATATGACTTAC-TTTCTAGTA--AGT---CTGTT----ACTCATTTGT
i turTru2.JH479543                 C 0 C 0
s oviAri1.chr9                      68470526 72 - 100831284 --TAT--TCCACA----GACTT--TACAACA-ATG-AT-TAGTTTCGATATGACTTAC-TTTCTAGTA--AGT---CTGTT----ACCCATTCGT
i oviAri1.chr9                     C 0 C 0
s bosTau7.chr14                     63542004 72 -  81216349 --TAT--TCTACA----GACTT--TACAATA-ATG-AT-TAGTTTTAATATGACTTAC-TTTCTAGTA--AGT---CTGTT----ACCCATTTGT
i bosTau7.chr14                    C 0 C 0
s felCat5.chrF2                     64502297 72 +  82763536 --TAT--TCTATA----AACCT--ACCAAAA-GTT-AC-TAGTTCCAATCTGACTTAC-TTTCTAGTA--AGT---TTCTT----ATTCGTTTGC
i felCat5.chrF2                    C 0 C 0
s ailMel1.GL193711.1                  156415 72 -    529242 --TCT--TCTATA----AACCT--AACTAAA-ACA-AC-TAGTTTCAATCTGACTTAC-TTTCTAGGA--AGT---TTCTT----ATTCATTCGT
i ailMel1.GL193711.1               C 0 C 0
s equCab2.chr9                      64366319 76 +  83561422 --TCTAGTCTACA----GAACT--AACAAAA-TTG-AT-CAGTTCCAATGTGATTTAC-TTTCTACTAACAGT---CTCTT----ACCCGTTTCT
i equCab2.chr9                     C 0 C 0
s myoLuc2.GL429784                   8893045 80 +  14577598 --TGT--TCTATAGACTGACTT--AACAAGA-ATA-AT-TA--TACAATCTGATTTAC-TTTCTAGTAACTGT---TTCTTTCCTATTCATTCAT
i myoLuc2.GL429784                 C 0 C 0
s pteVam1.scaffold_9062                53670 69 +     66173 --TAT--TCCACA----GACTT--AACAAAA-AGG-AT-CA--CCCAATCTGCCTTACTTTTCTAGTAACAAT---TTCTT--------ATTTAT
i pteVam1.scaffold_9062            C 0 C 0
s loxAfr3.scaffold_8                67684333 76 +  85640724 GATAT--TCCATA----GACCT--AAGAAAA-ATG-AT-TGGCTCCAAGCTAACTTAC-TTTCTAGTAACAGT---TTCTT----ATTCATTTGT
i loxAfr3.scaffold_8               C 0 C 0
s proCap1.scaffold_5125                53437 62 +     62060 GATAT--TCT--------------------A-ATA-AT-TAGCCCCAAGCTAACTTAC-TTTCTAGCAATGGT---TTCTT----ATTCATTTGT
i proCap1.scaffold_5125            C 0 C 0
s echTel1.scaffold_246123               8758 78 -     12816 GGTGT--TCCATA----GAACTACAGGAGAA-AAA-AT-ATGTTCCAAGTTAACTTCC-TTTCTAGTAATGAT---TTCTT----ATTCATTTGC
i echTel1.scaffold_246123          C 0 C 0
s triMan1.JH594628                   9783704 76 +  24477914 GATAT--TCTATA----GACCT--AAGAAAA-ATG-AT-TGGCTCCAAGCTAACTTAC-TTTCTAGTAACGAT---TTCTT----ATTCATTTGT
i triMan1.JH594628                 C 0 C 0
s dasNov3.JH579962                   3296319 70 +   3334091 TATAT--TTTATA----GACCT--AGGAAGA-ATG-TT-CAGCTCCGAGCTACCTAAC-TTTCTAGTAA--GT---TTCTC----ATTTGT----
i dasNov3.JH579962                 C 0 C 0
e ochPri2.scaffold_3008                37098 2113 +    168654 I
e choHof1.scaffold_1338                24366 140 +     46317 I
e gorGor3.chr8                     121284328 8675 + 145327772 T
e canFam3.chr13                     20337317 1232 +  63241923 I
e melGal1.chr3                      88078472 9551 + 100405168 I
e sarHar1.chr2_GL841388_random        481984 12896 +   1237177 I
e melUnd1.JH556481                    782640 58368 +   3508697 I
e monDom5.chr3                     395438024 14746 + 527952102 I
e chrPic1.JH584538                    404458 7740 +   8176890 I
e galGal4.chr2                     136949488 65088 + 148809762 I

a score=361792.000000
s mm10.chr15                        56691347 15 + 104043685 TGGGCAAGTCCTCTT
s rn5.chr7                          97078355 15 + 143501887 TAGGCAAGTCCTGTT
i rn5.chr7                         C 0 C 0
s dipOrd1.scaffold_76283                 517 15 +      5145 GGTACAATTCTTGTT
i dipOrd1.scaffold_76283           C 0 C 0
s cavPor3.scaffold_95                5257288 15 -   5884597 CACACAATTCCTGTT
i cavPor3.scaffold_95              C 0 C 0
s speTri2.JH393280                  21199728 15 -  46620681 TGCATAATTCCTGTT
i speTri2.JH393280                 C 0 C 0
s oryCun2.chr3                     137516684 15 + 155691105 TACACAATTCCTATT
i oryCun2.chr3                     C 0 C 0
s hg19.chr8                        122650525 15 + 146364022 TGCACAATTCCCAAT
i hg19.chr8                        C 0 C 0
s panTro4.chr8                     120287555 15 + 143986469 TGCACAATTCCCAAT
i panTro4.chr8                     C 0 C 0
s ponAbe2.chr8                     129325577 15 + 153482349 TGCACAATTCCCAAT
i ponAbe2.chr8                     C 0 C 0
s nomLeu2.GL397267                  35743326 15 +  48819562 TGCACAATTCCCAAT
i nomLeu2.GL397267                 C 0 C 0
s rheMac3.chr8                     126564818 15 + 150158102 TGCACAATTCCCCAT
i rheMac3.chr8                     C 0 C 0
s papHam1.scaffold1185                 78073 15 +    226188 TGCACAATTCCCCAT
i papHam1.scaffold1185             C 0 C 0
s calJac3.chr16                     23628310 15 -  96796970 TGCACAATCCCTGTT
i calJac3.chr16                    C 0 C 0
s saiBol1.JH378158                   9050319 15 -  16265076 TGCACAATTTTTATT
i saiBol1.JH378158                 C 0 C 0
s micMur1.scaffold_4913                89938 15 +    135929 TGCACAATTCCTATT
i micMur1.scaffold_4913            C 0 C 0
s otoGar3.GL873523                  39380237 15 -  47749213 TGTACAATTCTTTTT
i otoGar3.GL873523                 C 0 C 0
s tupBel1.scaffold_119809.1-330533     18414 15 +    330533 TGCACAATTCTTATT
i tupBel1.scaffold_119809.1-330533 C 0 C 0
s susScr3.chr4                      18485909 15 + 143465943 TGCACAATTCTTGTT
i susScr3.chr4                     C 0 C 0
s vicPac1.scaffold_13                1553822 15 +   2369290 TGCACAATTCCTGTT
i vicPac1.scaffold_13              C 0 C 0
s turTru2.JH479543                     73791 15 -    135452 TGCACAATTCTTGTT
i turTru2.JH479543                 C 0 C 0
s oviAri1.chr9                      68470598 15 - 100831284 TGCACAATTCTTGTT
i oviAri1.chr9                     C 0 C 0
s bosTau7.chr14                     63542076 15 -  81216349 TGCACAATTCTTGTT
i bosTau7.chr14                    C 0 C 0
s felCat5.chrF2                     64502369 15 +  82763536 TGCCCAAGTCCTGTG
i felCat5.chrF2                    C 0 C 0
s ailMel1.GL193711.1                  156487 15 -    529242 TGCTCAATTCCTGTG
i ailMel1.GL193711.1               C 0 C 0
s equCab2.chr9                      64366395 15 +  83561422 TGCACAATTTCTGTT
i equCab2.chr9                     C 0 C 0
s myoLuc2.GL429784                   8893125 15 +  14577598 TGCACAATTCCTGTT
i myoLuc2.GL429784                 C 0 C 0
s pteVam1.scaffold_9062                53739 15 +     66173 TGCACAATACTTGTT
i pteVam1.scaffold_9062            C 0 C 0
s loxAfr3.scaffold_8                67684409 15 +  85640724 TGCACAACTCCTGTT
i loxAfr3.scaffold_8               C 0 C 0
s proCap1.scaffold_5125                53499 15 +     62060 TGCACAACTTCTGTT
i proCap1.scaffold_5125            C 0 I 183
s echTel1.scaffold_246123               8836 14 -     12816 TGCATAACCCATTC-
i echTel1.scaffold_246123          C 0 C 0
s triMan1.JH594628                   9783780 15 +  24477914 TGCATAACTCCTGTT
i triMan1.JH594628                 C 0 C 0
s dasNov3.JH579962                   3296389 12 +   3334091 TACATAACTCTC---
i dasNov3.JH579962                 C 0 I 3
s choHof1.scaffold_1338                24506 12 +     46317 TGGAATTCTCCT---
i choHof1.scaffold_1338            I 140 I 3
e ochPri2.scaffold_3008                37098 2113 +    168654 I
e gorGor3.chr8                     121284328 8675 + 145327772 T
e hetGla2.JH602048                   9048149  0 -  42145720 C
e canFam3.chr13                     20337317 1232 +  63241923 I
e melGal1.chr3                      88078472 9551 + 100405168 I
e sarHar1.chr2_GL841388_random        481984 12896 +   1237177 I
e melUnd1.JH556481                    782640 58368 +   3508697 I
e monDom5.chr3                     395438024 14746 + 527952102 I
e chrPic1.JH584538                    404458 7740 +   8176890 I
e galGal4.chr2                     136949488 65088 + 148809762 I

a score=1459863.000000
s mm10.chr15                        56691362  75 + 104043685 TTCCTGGACAACAGCAGCTGACTGT-ATATCGTATT---------------------TATTC-AAATTTGATGCTAATCACTAATCGGTT-ACAT-------------------------------------------ATTT
s rn5.chr7                          97078370  87 + 143501887 TTCCTGGACA---GCAGCTGACTGT-ATATCATATTGACTT----TCT--GGAGTGATATTC-AAATGTGATGCTTATCGCTAATCAGTT-ACAT-------------------------------------------ATTT
i rn5.chr7                         C 0 C 0
s dipOrd1.scaffold_76283                 532  88 +      5145 GGGCAGGATA---GTAGCTGACAGT--TATCATGTTCGGTT----TGTTGAGAGTGATATTT-AAATTTAATACTAATTGATAAATGGTT-AAGT-------------------------------------------TCTT
i dipOrd1.scaffold_76283           C 0 C 0
s hetGla2.JH602048                   9048149  43 -  42145720 ------------------------------------------------------TAATATTC-AAATTTGATGCTAGTCACCAATTTGTT-AAAT-------------------------------------------CCTT
i hetGla2.JH602048                 C 0 C 0
s cavPor3.scaffold_95                5257303  91 -   5884597 TTACAGGAAG---GTAGCTGATTTAAATATCAACTCTGCTT----TGTGAAAACTAATATTC-AAATTTGATGCTAATCACCAACTTGTTAAAAT-------------------------------------------CTTT
i cavPor3.scaffold_95              C 0 C 0
s speTri2.JH393280                  21199743  89 -  46620681 TTCCAGGAAG---GTACTTGACTAA-GTATCTCCTTTTCTT----TGAAGAGAGTCATAACT-TTATTTGATGCAAGCCACCAACTTATT-AAAT-------------------------------------------CTTT
i speTri2.JH393280                 C 0 C 0
s oryCun2.chr3                     137516699  73 + 155691105 TTCCAGGAAG-----------CTCC-TTATCATCCTTTCTT----TCTGGAGAGTGACATTC-AAATTTTCTTCAAGTCATCAATGTATT----------------------------------------------------
i oryCun2.chr3                     C 0 C 0
s hg19.chr8                        122650540  86 + 146364022 TTCCAGGAAG---GTAGCTGACTAA-AT---ATCTTTGCTT----TATGGAAAGTGACCTTA-GAGTTTAATGCTAGTCACTGATTTGTT-AAGT-------------------------------------------CCTT
i hg19.chr8                        C 0 C 0
s panTro4.chr8                     120287570  86 + 143986469 TTCCAGGAAG---GTAGCTGACTAA-AT---ATCTTTGCTT----TATGGAAAGTGACATTA-GAGTTTAATGCTAGTCACTGATTTGTT-AAGT-------------------------------------------CCTT
i panTro4.chr8                     C 0 C 0
s ponAbe2.chr8                     129325592  86 + 153482349 TTCCAGGAAG---GTAGCTGACTAA-AT---AACTTTGCTT----TGTGGAAAGTGACATTA-GAATTTAATGCTAGTCACTGATTTGTT-AAGT-------------------------------------------CCTT
i ponAbe2.chr8                     C 0 C 0
s nomLeu2.GL397267                  35743341  86 +  48819562 TTCCAGGAAG---GTAGCTGACTAA-AT---ATCTTTGCTT----TGTGGAAAGTGACATTA-GAATTTAATGTTAGTCACTGATTTGTT-AAGT-------------------------------------------CCTT
i nomLeu2.GL397267                 C 0 C 0
s rheMac3.chr8                     126564833  86 + 150158102 TTCCAGGAAG---GTAGCTGACTAA-AT---ATCTTTGCTC----TGTGGAGAGTGACATTA-GAATTTAATGCTAGTCACTGATTTGTT-AAGT-------------------------------------------CCTT
i rheMac3.chr8                     C 0 C 0
s papHam1.scaffold1185                 78088  86 +    226188 TTCCAGGAAG---GTAGCTGACTAA-AT---ATCTTTGCTC----TGTGGAGAGTGACATTA-GAATTTAATGCTAGTCACTGATTTGTT-AAGT-------------------------------------------CCTT
i papHam1.scaffold1185             C 0 C 0
s calJac3.chr16                     23628325  83 -  96796970 TTCCAGGAAG---GAAGCTGACTAA-AT-----CCTTGCTT----TATGGAGAGTGACATTA-GAATTTAATGCTAGTCACTGATGTGTT-AAGT--------------------------------------------CTT
i calJac3.chr16                    C 0 C 0
s saiBol1.JH378158                   9050334  84 -  16265076 TTCCAGGAAG---GTAGCTGACTAA-AT-----CCTTGCTT----TGTGGAGAGTGACATTA-GAATTTAATGCTAGTCACTGATTTGTT-AAGT-------------------------------------------CCTT
i saiBol1.JH378158                 C 0 C 0
s micMur1.scaffold_4913                89953  85 +    135929 ATCCAGGAAT---GTTGCTA-CTAC-AT---ATCTTTGCTT----TCAGGGGAATATCATTA-AAATTTGATGCTAGTCACCGATTTGTT-AAGT-------------------------------------------CTTC
i micMur1.scaffold_4913            C 0 C 0
s otoGar3.GL873523                  39380252  83 -  47749213 TTCCAGGAAG---GCTAATA---AA-AT---ATCTTTGCTT----TCAAGAGAGTGACATTA-AGATGCAATGCTAGTCACCGATTTGTT-AAGT-------------------------------------------CTTG
i otoGar3.GL873523                 C 0 C 0
s tupBel1.scaffold_119809.1-330533     18429  85 +    330533 TTCTAGGAAG---GTAGCT----AA-ATGTCACCTTTGCTT----TGTGGAGTGGGCCATTC-AAATTTGATGCTAATGACCAACTCATT-AAGT-------------------------------------------CTTT
i tupBel1.scaffold_119809.1-330533 C 0 C 0
s susScr3.chr4                      18485924  79 + 143465943 TTCCAGGAAG---GTAGCTGACTAA-ATATCATCTTTGTTT----CATTGAGCATGACACTC-ATATTTGATGCTAGTCACCGAC---TT-A--------------------------------------------------
i susScr3.chr4                     C 0 I 7
s vicPac1.scaffold_13                1553837  75 +   2369290 TTCCAGG-AG---ATAGCTGACTAA-AT---ATCTTTGTTT----TGTGAAGGATGACTTTC-AGATTTGATGCTAGTCACCGAT---GT-A--------------------------------------------------
i vicPac1.scaffold_13              C 0 I 7
s turTru2.JH479543                     73806  70 -    135452 TTCCAGGAAG---GTAGCTGACTAA-AC---------GTTT----TGTGGAGAGTGACATTC-AAATTTGATGCTAGTCACTGAT---TT-A--------------------------------------------------
i turTru2.JH479543                 C 0 I 7
s oviAri1.chr9                      68470613  79 - 100831284 TTCCAAGAAG---GTAGGTGACTAA-ACACCATCTTTGTTT----GGAGGAGAGTGGCATTC-AGATTTGGTACTAGTCATTGAT---TT-A--------------------------------------------------
i oviAri1.chr9                     C 0 I 7
s bosTau7.chr14                     63542091  79 -  81216349 TTCCAAGAAA---GTAGGTGACTAA-ACACCATCTTTGTTT----GGAGGAGAGTGGCATTC-AGATTTGGTACTAGTCATTGAT---TT-A--------------------------------------------------
i bosTau7.chr14                    C 0 I 7
s felCat5.chrF2                     64502384  82 +  82763536 TTCCAGGAAG---GTT----AACCT-ACTACATCTTTGCTT----TGTGGAGAGTGACATGC-AAATTGGATGCTAATCGTCTAT---TT-AAGA-------------------------------------------ACTT
i felCat5.chrF2                    C 0 C 0
s ailMel1.GL193711.1                  156502  80 -    529242 TTCCAGGATG---G------AAGAA-ACTTCATCTTTGCTT----TGTGGAGAGTGACATTC-AAATTTGAGGCTAATCGCCAAT---TT-AAGA-------------------------------------------CTTT
i ailMel1.GL193711.1               C 0 C 0
s equCab2.chr9                      64366410  82 +  83561422 TTCCAGGAAG---ATA----ACTAT-CTATCATCTTTGCTT----TGTGAAGAGTGACATTT-AAATTTGATTCTAGTCAATAAT---TT-AAGA-------------------------------------------TCTT
i equCab2.chr9                     C 0 I 1
s myoLuc2.GL429784                   8893140  87 +  14577598 TTCCAGGAAG---GTAACTGACTAA-AT---ATTTTTGCTTCCTTCCTGGAGAGTGACATTC-AAATTTGATAGTAGTCATTGAC---TT-AAGA-------------------------------------------CCTT
i myoLuc2.GL429784                 C 0 I 258
s pteVam1.scaffold_9062                53754  83 +     66173 TTCCAGAAAT---GTGGCTGACTAA-ATATCATCTTTGCTT------TGTAGAGTGACTTTC--AATTTGATATTAGTTACCGAT---TT-AAGA-------------------------------------------CCTT
i pteVam1.scaffold_9062            C 0 I 1
s loxAfr3.scaffold_8                67684424  84 +  85640724 TTCCAGGAAG---GTAGCTGACTAA-ACATCACCTCTGGTT----TGTGGAGAGTGACATTC-AAAATTATTGCTCATCACTG-----TT-AAGT-------------------------------------------CCTT
i loxAfr3.scaffold_8               C 0 C 0
s proCap1.scaffold_5125                53697  89 +     62060 TTCCAGGAAA---ATAGCTAACTAG-ATATCATTTTTGCTT----TGTGGACAGTGACATTC-ATCTTTGACACTAGTAACAGAGTCATT-AAGT-------------------------------------------CCTT
i proCap1.scaffold_5125            I 183 C 0
s echTel1.scaffold_246123               8850  89 -     12816 TTCCTGGAAG---GTAGCTGACTGA-ATATTTTTTTTGTTT----TATGGAGAAAGACATAT-AAATTTGATGCTATTCACCGACTCCTT-AAGC-------------------------------------------TCTT
i echTel1.scaffold_246123          C 0 C 0
s triMan1.JH594628                   9783795  89 +  24477914 TTCCAGGAAG---GTAGCTGACTAA-GTATCATCTTTGCTT----TGTGGAGAGTGACATTC-AAAGTTGACACTAATCACTAATTTGTT-AAGT-------------------------------------------CCTT
i triMan1.JH594628                 C 0 C 0
s dasNov3.JH579962                   3296404 129 +   3334091 TTCCAGGAAA---CTGGGTGACTAA-A--TAGTCTTTGCTT----AGCGGTGAATGACATTCAAAATTTGATGCTAGT--CAAATTTGTT-ATACATTCATTAATAAGTATTATTATTCGTACGTATGTGAGAAAATGCCTT
i dasNov3.JH579962                 I 3 C 0
s choHof1.scaffold_1338                24521  89 +     46317 TTCTAGGAAA---GTAGGTGACTAA-GTCTCATCTTTGCTT----AGCGGAGAATGACATTC-AAATTTGATGCTAGTAGCCCATTTGTT-AGGT-------------------------------------------CCTT
i choHof1.scaffold_1338            I 3 C 0
e ochPri2.scaffold_3008                37098 2113 +    168654 I
e gorGor3.chr8                     121284328 8675 + 145327772 T
e canFam3.chr13                     20337317 1232 +  63241923 I
e melGal1.chr3                      88078472 9551 + 100405168 I
e sarHar1.chr2_GL841388_random        481984 12896 +   1237177 I
e melUnd1.JH556481                    782640 58368 +   3508697 I
e monDom5.chr3                     395438024 14746 + 527952102 I
e chrPic1.JH584538                    404458 7740 +   8176890 I
e galGal4.chr2                     136949488 65088 + 148809762 I

a score=539819.000000
s mm10.chr15                        56691437 28 + 104043685 GGA----CTTT--ATATGCTT-ATGACT-----TCA-TTTG
s rn5.chr7                          97078457 28 + 143501887 GGA----CTTT--ATATGCTG-ATGACT-----TTA-CTTG
i rn5.chr7                         C 0 C 0
s dipOrd1.scaffold_76283                 620 31 +      5145 GAG----TTTTTAATATGCTGTATAATT-----CTC-CTTG
i dipOrd1.scaffold_76283           C 0 C 0
s hetGla2.JH602048                   9048192 35 -  42145720 CAA----TTTCT-ATATGTTGCATAACCATATGCTG-CATA
i hetGla2.JH602048                 C 0 C 0
s cavPor3.scaffold_95                5257394 35 -   5884597 CAG----ATTCT-AAATGCTGCATAACTATATGCTG-CATA
i cavPor3.scaffold_95              C 0 C 0
s speTri2.JH393280                  21199832 30 -  46620681 GAA----TTTTT-ATATGCTTCATAACT-----ATG-TAAA
i speTri2.JH393280                 C 0 C 0
s oryCun2.chr3                     137516772 24 + 155691105 ---------TTT-ATAGGCTGTATAATT------TC-TTTG
i oryCun2.chr3                     C 0 C 0
s hg19.chr8                        122650626 30 + 146364022 GAA----TTTTT-ATAAACTGCATAACT-----TTC-TTTG
i hg19.chr8                        C 0 C 0
s panTro4.chr8                     120287656 30 + 143986469 GAA----TTTTT-ATAAACTGCATAACT-----TTC-TTTG
i panTro4.chr8                     C 0 C 0
s ponAbe2.chr8                     129325678 30 + 153482349 GAA----TTTTT-ATAAACTGCATAACT-----TTC-TTTG
i ponAbe2.chr8                     C 0 C 0
s nomLeu2.GL397267                  35743427 30 +  48819562 GAA----TTTTT-ATAAACTGCATAACT-----TTC-TTTG
i nomLeu2.GL397267                 C 0 C 0
s rheMac3.chr8                     126564919 30 + 150158102 GAA----TTTTT-ATAAACTGCATAACT-----TTC-TTTG
i rheMac3.chr8                     C 0 C 0
s papHam1.scaffold1185                 78174 30 +    226188 GAA----TTTTT-ATAAACTGCATAACT-----TTC-TTTG
i papHam1.scaffold1185             C 0 C 0
s calJac3.chr16                     23628408 30 -  96796970 GAA----TCTTT-ATAAACTGCATAACT-----TTC-TTTG
i calJac3.chr16                    C 0 C 0
s saiBol1.JH378158                   9050418 30 -  16265076 GAA----TTTTT-ATAAAATGCATAACT-----TTC-TTTG
i saiBol1.JH378158                 C 0 C 0
s micMur1.scaffold_4913                90038 30 +    135929 GAG----TTTTT-ATAAACTGCATAACT-----TTC-TTTG
i micMur1.scaffold_4913            C 0 C 0
s otoGar3.GL873523                  39380335 30 -  47749213 GAA----TTTTT-ATAAACTGCGTTACT-----TTC-TTTA
i otoGar3.GL873523                 C 0 C 0
s tupBel1.scaffold_119809.1-330533     18514 30 +    330533 AAG----ATTTT-ATAAGCTGCATAACT-----CTC-TTTG
i tupBel1.scaffold_119809.1-330533 C 0 C 0
s susScr3.chr4                      18486010 31 + 143465943 GAA----TTTTT-ATAAGCACCATAGCT-----TTTGTTTG
i susScr3.chr4                     I 7 I 3
s vicPac1.scaffold_13                1553919 30 +   2369290 GAA----TTTTT-ATAAGCACCATAGCC-----TTC-TCTG
i vicPac1.scaffold_13              I 7 I 3
s turTru2.JH479543                     73883 30 -    135452 GAA----TTCTT-ATAAACACCATAGCT-----TTC-TCTG
i turTru2.JH479543                 I 7 I 3
s oviAri1.chr9                      68470699 30 - 100831284 GAA----TTCTT-ACAGTTGCCATAGCT-----TTC-TCTG
i oviAri1.chr9                     I 7 I 3
s bosTau7.chr14                     63542177 33 -  81216349 GAA-TTCTTCTT-ATAGTTGCCATAGCT-----TTC-TCTG
i bosTau7.chr14                    I 7 I 3
s felCat5.chrF2                     64502466 29 +  82763536 -CA----TTTTT-ATAAGCTGCATAACT-----TTC-TCTG
i felCat5.chrF2                    C 0 C 0
s ailMel1.GL193711.1                  156582 29 -    529242 -AA----TTTAT-CGAAGCTGCATAATT-----TTC-TCTG
i ailMel1.GL193711.1               C 0 C 0
s equCab2.chr9                      64366493 29 +  83561422 -CA----TTTTT-ATATGCTGAGTAACT-----TTG-TCTG
i equCab2.chr9                     I 1 C 0
s pteVam1.scaffold_9062                53838 30 +     66173 -AA----TTTTTGAAAAGCTGCACAACT-----TTC-TCTA
i pteVam1.scaffold_9062            I 1 C 0
s loxAfr3.scaffold_8                67684508 32 +  85640724 GGA--TTTTTTT-ATAAGTTGCACACCT-----TTC-TTTG
i loxAfr3.scaffold_8               C 0 C 0
s proCap1.scaffold_5125                53786 34 +     62060 AGATTTTTTTTT-ATATGATGCATACCT-----GTC-TTTG
i proCap1.scaffold_5125            C 0 C 0
s echTel1.scaffold_246123               8939 33 -     12816 GAA-TTTTTTTT-TTAAGTTACTTACCT-----TGG-TGAG
i echTel1.scaffold_246123          C 0 C 0
s triMan1.JH594628                   9783884 31 +  24477914 GAA---TTTTTT-ATAAGTTGCATACCT-----TTC-TTTA
i triMan1.JH594628                 C 0 C 0
s dasNov3.JH579962                   3296533 30 +   3334091 GAA----TTTTC-ACAAACTGCATAACT-----TTC-TTTA
i dasNov3.JH579962                 C 0 C 0
s choHof1.scaffold_1338                24610 26 +     46317 GAA----TTTTT-ATAAATTGCACAACT-----TTT-----
i choHof1.scaffold_1338            C 0 C 0
e ochPri2.scaffold_3008                37098 2113 +    168654 I
e myoLuc2.GL429784                   8893227 258 +  14577598 I
e gorGor3.chr8                     121284328 8675 + 145327772 T
e canFam3.chr13                     20337317 1232 +  63241923 I
e melGal1.chr3                      88078472 9551 + 100405168 I
e sarHar1.chr2_GL841388_random        481984 12896 +   1237177 I
e melUnd1.JH556481                    782640 58368 +   3508697 I
e monDom5.chr3                     395438024 14746 + 527952102 I
e chrPic1.JH584538                    404458 7740 +   8176890 I
e galGal4.chr2                     136949488 65088 + 148809762 I

a score=-340524.000000
s mm10.chr15                        56691465  9 + 104043685 AT-----AA--A----G---TTT
s rn5.chr7                          97078485  9 + 143501887 GT-----AA--A----G---TTT
i rn5.chr7                         C 0 C 0
s dipOrd1.scaffold_76283                 651  9 +      5145 GT-----AA--T----A---TGT
i dipOrd1.scaffold_76283           C 0 C 0
s hetGla2.JH602048                   9048227 11 -  42145720 AC---CAAA--A----G---TTT
i hetGla2.JH602048                 C 0 C 0
s cavPor3.scaffold_95                5257429 14 -   5884597 GCCAACAAA--A----C---TTT
i cavPor3.scaffold_95              C 0 C 0
s speTri2.JH393280                  21199862  8 -  46620681 GT-----AA--G----T---TT-
i speTri2.JH393280                 C 0 C 0
s oryCun2.chr3                     137516796  9 + 155691105 GT-----AA--T----G---TAA
i oryCun2.chr3                     C 0 C 0
s hg19.chr8                        122650656  8 + 146364022 AT-----AA--A----G---GG-
i hg19.chr8                        C 0 C 0
s panTro4.chr8                     120287686  8 + 143986469 AT-----AA--A----G---GG-
i panTro4.chr8                     C 0 C 0
s ponAbe2.chr8                     129325708  8 + 153482349 AT-----AA--A----G---GG-
i ponAbe2.chr8                     C 0 C 0
s nomLeu2.GL397267                  35743457  8 +  48819562 AT-----AA--A----G---GG-
i nomLeu2.GL397267                 C 0 C 0
s rheMac3.chr8                     126564949  8 + 150158102 AT-----AA--A----G---GG-
i rheMac3.chr8                     C 0 C 0
s papHam1.scaffold1185                 78204  8 +    226188 AT-----AA--A----G---GG-
i papHam1.scaffold1185             C 0 C 0
s calJac3.chr16                     23628438  8 -  96796970 AT-----AA--A----G---TT-
i calJac3.chr16                    C 0 C 0
s saiBol1.JH378158                   9050448  8 -  16265076 AT-----AA--A----T---TT-
i saiBol1.JH378158                 C 0 C 0
s micMur1.scaffold_4913                90068  8 +    135929 AG-----AA--A----A---GA-
i micMur1.scaffold_4913            C 0 C 0
s otoGar3.GL873523                  39380365  8 -  47749213 AT-----AA--A----A---GA-
i otoGar3.GL873523                 C 0 C 0
s tupBel1.scaffold_119809.1-330533     18544 10 +    330533 GT-----AAATA----A---GG-
i tupBel1.scaffold_119809.1-330533 C 0 C 0
s susScr3.chr4                      18486044  5 + 143465943 AG-----TA--A-----------
i susScr3.chr4                     I 3 C 0
s vicPac1.scaffold_13                1553952  5 +   2369290 AG-----TA--A-----------
i vicPac1.scaffold_13              I 3 C 0
s turTru2.JH479543                     73916  5 -    135452 AG-----AA--A-----------
i turTru2.JH479543                 I 3 C 0
s oviAri1.chr9                      68470732  5 - 100831284 AC-----AA--A-----------
i oviAri1.chr9                     I 3 C 0
s bosTau7.chr14                     63542213  5 -  81216349 AC-----AA--A-----------
i bosTau7.chr14                    I 3 C 0
s felCat5.chrF2                     64502495  2 +  82763536 ------------GT---------
i felCat5.chrF2                    C 0 I 2
s canFam3.chr13                     20338549  9 +  63241923 at-----aa--agtct-------
i canFam3.chr13                    I 1232 I 8
s ailMel1.GL193711.1                  156611  7 -    529242 GT-----AA--AGT---------
i ailMel1.GL193711.1               C 0 I 2
s equCab2.chr9                      64366522  7 +  83561422 GT-----CA--AGT---------
i equCab2.chr9                     C 0 I 2
s pteVam1.scaffold_9062                53868  6 +     66173 GT-----AA--AG----------
i pteVam1.scaffold_9062            C 0 C 0
s loxAfr3.scaffold_8                67684540  6 +  85640724 GT-----AA--A----G------
i loxAfr3.scaffold_8               C 0 C 0
s proCap1.scaffold_5125                53820  6 +     62060 GT-----AA--A----G------
i proCap1.scaffold_5125            C 0 C 0
s echTel1.scaffold_246123               8972  6 -     12816 GT-----AA--G----A------
i echTel1.scaffold_246123          C 0 C 0
s triMan1.JH594628                   9783915  9 +  24477914 GT-----AA--A----GTAA---
i triMan1.JH594628                 C 0 C 0
s dasNov3.JH579962                   3296563  9 +   3334091 GG-----AG--C----GTAA---
i dasNov3.JH579962                 C 0 C 0
s choHof1.scaffold_1338                24636  9 +     46317 GT-----AT--A----GTAA---
i choHof1.scaffold_1338            C 0 C 0
e ochPri2.scaffold_3008                37098 2113 +    168654 I
e myoLuc2.GL429784                   8893227 258 +  14577598 I
e gorGor3.chr8                     121284328 8675 + 145327772 T
e melGal1.chr3                      88078472 9551 + 100405168 I
e sarHar1.chr2_GL841388_random        481984 12896 +   1237177 I
e melUnd1.JH556481                    782640 58368 +   3508697 I
e monDom5.chr3                     395438024 14746 + 527952102 I
e chrPic1.JH584538                    404458 7740 +   8176890 I
e galGal4.chr2                     136949488 65088 + 148809762 I

a score=379607.000000
s mm10.chr15                        56691474 21 + 104043685 GGATTAAGCCTTAG-CTA---------TA--A-C
s rn5.chr7                          97078494 30 + 143501887 GGGTTAAGCTTTAG-ACAGTTCTATCTTT--T-A
i rn5.chr7                         C 0 C 0
s dipOrd1.scaffold_76283                 660 21 +      5145 GAATTCATTTTTAT-GTA---------CT--A-A
i dipOrd1.scaffold_76283           C 0 C 0
s hetGla2.JH602048                   9048238 21 -  42145720 GGAATCAGTCCCAC-ATG---------CA--A-T
i hetGla2.JH602048                 C 0 C 0
s cavPor3.scaffold_95                5257443 21 -   5884597 GGAATCAGTCCCAT-GTA---------CA--G-T
i cavPor3.scaffold_95              C 0 C 0
s speTri2.JH393280                  21199870 17 -  46620681 ----TCAACTCTAG-GTA---------CA--A-T
i speTri2.JH393280                 C 0 C 0
s oryCun2.chr3                     137516805 21 + 155691105 GGATTCAATTCTAC-ACA---------CA--A-T
i oryCun2.chr3                     C 0 C 0
s hg19.chr8                        122650664 19 + 146364022 --ATTCGACTCCGG-GTA---------CA--G-T
i hg19.chr8                        C 0 C 0
s panTro4.chr8                     120287694 19 + 143986469 --ATTCGACTCCGG-GTA---------CA--G-T
i panTro4.chr8                     C 0 C 0
s ponAbe2.chr8                     129325716 19 + 153482349 --ATTCGACTACGG-GTA---------CA--G-T
i ponAbe2.chr8                     C 0 C 0
s nomLeu2.GL397267                  35743465 19 +  48819562 --ATTCGACTCCAG-GTA---------CA--G-T
i nomLeu2.GL397267                 C 0 C 0
s rheMac3.chr8                     126564957 19 + 150158102 --ATTCGACTCTGG-GTA---------CA--G-T
i rheMac3.chr8                     C 0 C 0
s papHam1.scaffold1185                 78212 19 +    226188 --ATTCGACTCTGG-GTA---------CA--G-T
i papHam1.scaffold1185             C 0 C 0
s calJac3.chr16                     23628446 18 -  96796970 ---TTTGGCTCCAG-CTA---------CA--G-T
i calJac3.chr16                    C 0 C 0
s saiBol1.JH378158                   9050456 18 -  16265076 ---TTTGACTCCAG-CTA---------CA--G-T
i saiBol1.JH378158                 C 0 C 0
s micMur1.scaffold_4913                90076 18 +    135929 ---TTCAGTTCCAG-GTA---------CA--A-T
i micMur1.scaffold_4913            C 0 C 0
s otoGar3.GL873523                  39380373 18 -  47749213 ---TTCAATTTTAG-GTA---------CA--A-T
i otoGar3.GL873523                 C 0 C 0
s tupBel1.scaffold_119809.1-330533     18554 20 +    330533 --ATTCAATTCAAG-GTA---------CA--ATT
i tupBel1.scaffold_119809.1-330533 C 0 C 0
s susScr3.chr4                      18486049 21 + 143465943 CGATTCAGTTCTAG-GTA---------CG--A-T
i susScr3.chr4                     C 0 C 0
s vicPac1.scaffold_13                1553957 19 +   2369290 GGATTCAAGTCTAG-GTA---------CA-----
i vicPac1.scaffold_13              C 0 C 0
s turTru2.JH479543                     73921 21 -    135452 GGATTCAGTTCTAG-GTA---------CA--A-T
i turTru2.JH479543                 C 0 C 0
s oviAri1.chr9                      68470737 21 - 100831284 GGATCCAGTTCTAG-GTA---------CA--G-T
i oviAri1.chr9                     C 0 C 0
s bosTau7.chr14                     63542218 23 -  81216349 GGATCCAGTTCTAG-GCA---------CAGTG-T
i bosTau7.chr14                    C 0 C 0
s felCat5.chrF2                     64502499 21 +  82763536 AGAGTTAGTTCCAG-GTA---------CA--A-C
i felCat5.chrF2                    I 2 C 0
s canFam3.chr13                     20338566 21 +  63241923 aaATTTAGTTTCAT-GTA---------CA--A-T
i canFam3.chr13                    I 8 C 0
s ailMel1.GL193711.1                  156620 21 -    529242 AGATTTAGTTCTAG-GTA---------CA--A-C
i ailMel1.GL193711.1               I 2 C 0
s equCab2.chr9                      64366531 21 +  83561422 GGATTCAGCTCTAG-GTA---------CA--A-T
i equCab2.chr9                     I 2 C 0
s myoLuc2.GL429784                   8893485 21 +  14577598 GGATTTAGTTCTAA-GTG---------TA--A-C
i myoLuc2.GL429784                 I 258 C 0
s pteVam1.scaffold_9062                53874 20 +     66173 -GATTCAGTTCTAG-GTA---------CA--G-A
i pteVam1.scaffold_9062            C 0 C 0
s loxAfr3.scaffold_8                67684546 19 +  85640724 --ATTCAATTCCAG-CTA---------CA--A-T
i loxAfr3.scaffold_8               C 0 C 0
s proCap1.scaffold_5125                53826 19 +     62060 --ATTCAATCCCAG-ATA---------CA--A-C
i proCap1.scaffold_5125            C 0 C 0
s echTel1.scaffold_246123               8978 19 -     12816 --ATTCACTTCTAA-CTC---------CA--A-C
i echTel1.scaffold_246123          C 0 I 1826
s triMan1.JH594628                   9783924 21 +  24477914 GCATTCAATTCCAG-CTA---------CA--A-T
i triMan1.JH594628                 C 0 C 0
s dasNov3.JH579962                   3296572 21 +   3334091 GAATTCACTTCTAG-TTA---------CA--A-T
i dasNov3.JH579962                 C 0 C 0
s choHof1.scaffold_1338                24645 22 +     46317 GGATTCACTTCTAGCCTA---------CA--A-T
i choHof1.scaffold_1338            C 0 C 0
e ochPri2.scaffold_3008                37098 2113 +    168654 I
e gorGor3.chr8                     121284328 8675 + 145327772 T
e melGal1.chr3                      88078472 9551 + 100405168 I
e sarHar1.chr2_GL841388_random        481984 12896 +   1237177 I
e melUnd1.JH556481                    782640 58368 +   3508697 I
e monDom5.chr3                     395438024 14746 + 527952102 I
e chrPic1.JH584538                    404458 7740 +   8176890 I
e galGal4.chr2                     136949488 65088 + 148809762 I

a score=1645202.000000
s mm10.chr15                        56691495 149 + 104043685 AGAAGCAATCT--AGGT--ACA-A--TGAATCTAATCAA-----TACA--------------------------------------TTTAC--------AATGC-ATGCCTCA--AGTCAGCTAACTCTGGT--A--ATGTGTATG----GGAACAAGAA--TGGGAAAGATGATATTCCAG--ATACAAGGCTTTAGT---TCAG-AATCTCC--ATACAGGACTTG
s rn5.chr7                          97078524 148 + 143501887 AGAAGCAAACT--AGGT--AGA-C--TGTATCTAATCGG-----TACA--------------------------------------TTTAC--------AATGC-ATGCCTCA--AGTCATCTACCTCTGGT--A--ATGTTTATG----GGAACAAGAA--TAGGGAAGATGGTATTCCAG--ACACAAG-CTTTAGT---TCAG-AACCTCC--ACACAGGACTGA
i rn5.chr7                         C 0 C 0
s dipOrd1.scaffold_76283                 681 126 +      5145 AAAATCA-------------------TTTATCT-GTCAA-----TGTA--------------------------------------TCTGC--------AATG---TTTTTCT--ACTCAGCCAACTC-------------ATATG----AGAAAATGAAACCTGTAAGAATAATAGTC------TATAAGGCTTTAATAAAAAAA-AATGTGC--ACATAGAATTTG
i dipOrd1.scaffold_76283           C 0 C 0
s hetGla2.JH602048                   9048259 148 -  42145720 ACAGGCAATTC--AGGT--AAT-A--GGCATCT-GTAAG-----CACA--------------------------------------TC-AC--------AATAT-ATTTTTCT--ATTCATCTGACTCAGGT--A--ACTTACAAG----AAAAAAGGAA--CAGGAAAGACAATATTCTAA--TTACGAACCTTTAAT---CTAGCACTATTC--ATGTAGGTTTGG
i hetGla2.JH602048                 C 0 C 0
s cavPor3.scaffold_95                5257464 148 -   5884597 ACAGGCAATTC--AAGT--AAC-A--CGCATCT-ATCTG-----CACA--------------------------------------TC-AC--------AAAAC-A-GTTTCT--ACTCCTCTGAACCAGGT--A--ACTTCCAGGA---AAAAAAGGTA--CAGGAAAGACAATACTCCAG--GTAGGAACCACTAAT---CTGGTACTATTC--AGGATGGTGTTG
i cavPor3.scaffold_95              C 0 C 0
s speTri2.JH393280                  21199887 139 -  46620681 ATAAGCAATCC--AGGT--AGC-A--TGCATCT-GCCAG-----TATA--------------------------------------CCTAC--------AATAC-ATTTTCCT--CTGCATTTGTCTCCGGT--A--ATATATAAG----CAAAAAGAGA--ATGGAAAG--GATATTCTAG--AT--------TTAAT---CCAGAAACAATT--ATGTAGAATTTG
i speTri2.JH393280                 C 0 C 0
s oryCun2.chr3                     137516826 149 + 155691105 ACATGCAACTC--AGGA--AAT-A--AACATCT-TTCAA-----AACA--------------------------------------TCTAT--------AATAC-ATTTTTTT--ATTCATCTGATTCTGGA--A--AAACCTAAG----AAAAAGAGAA--TAGGAGGAATGATATTCTAG--TTTCGATGTTTTAAT---GTAGAAATGTCC--ACCCGGAATTCA
i oryCun2.chr3                     C 0 C 0
s hg19.chr8                        122650683 149 + 146364022 ACAAGCAACTC--AGGT--AAT-A--TGCATTT-GTCAG-----CACG--------------------------------------TCCAC--------AATAT-ATTTTTCT--ATTTACCCGACTCAGGT--G--ATATCTAAG----AAAAAACAAA--TAGGGGGGATGATACTTTAG--TTACAATATTTTGTT---CTAGAAATGTCC--ACTTAAAAATCA
i hg19.chr8                        C 0 C 0
s panTro4.chr8                     120287713 149 + 143986469 ACAAGCAACTC--AGGT--AAT-A--TGCATTT-GTCAG-----CACG--------------------------------------TCCAC--------AATAT-ATTTTTCT--ATTTACCCGACTCAGGT--G--ATATCTAAG----AAAAAAGAAA--CAGGGGGGATGATACTTTAG--TTACAATATTTTGTT---CTAGAAATGTCC--ACTTAAAAATCA
i panTro4.chr8                     C 0 C 0
s ponAbe2.chr8                     129325735 148 + 153482349 ACAAGCAACTC--AGGT--AAT-A--TGCATTT-GTCAG-----CACG--------------------------------------TCTAC--------AATAT-ATTTTTCT--ATTTACCCGACTCAAGT--G--ATATCTAAG----AAAAAAGAAA--T-GGGCGGATGATACTTTAG--TTACAATATTTGGTT---CTAGAAATGTCC--ACTTAAAAATCA
i ponAbe2.chr8                     C 0 C 0
s nomLeu2.GL397267                  35743484 149 +  48819562 ACAAGCAACTC--AGGT--AAT-A--TGCATTT-GTCAG-----CACG--------------------------------------TCTAC--------AATAT-ATTTTTCT--ATTTACCTGACTCAGGT--G--ATATCTAAG----AAAAAAGAAA--TAGGGGAGATGATACTTTAG--TTACAATATTTTGTT---CTAGAAATGTCC--ACTTAAAAATCA
i nomLeu2.GL397267                 C 0 C 0
s rheMac3.chr8                     126564976 187 + 150158102 ACAAGTAACTC--AGGT--AAT-A--CGCATTT-GTCAG-----CACAAATGCATATTACCTGATATATTTTTTTATTTTGCGTATTACAC--------AGTAT-ATTTTTCT--ATTTACCAGACTCAGGT--G--ATATCTAAG----AAAAAAGAAA--TAGGGGGGATTATACTTTAG--CTATAATATTTTATT---CTAGAAATGTCC--ACTAAGAAATCA
i rheMac3.chr8                     C 0 C 0
s papHam1.scaffold1185                 78231 149 +    226188 ACAAGTAACTC--AGGT--AAT-A--CGCATTT-GTCAG-----CACG--------------------------------------TCTAC--------AGTAT-ATTTTTCT--ATTTACCAGACTCAGAT--G--ATATCTAAG----AAAAAAGAAA--TAGGGGGGATGATACTTTAG--CTATAATATTTTATT---CTAGAAATGTCC--ACTAAGAAATCA
i papHam1.scaffold1185             C 0 C 0
s calJac3.chr16                     23628464 150 -  96796970 ACAAGCAACTC--AGGT--AAT-A--CGCAGTT-GTCAG-----TATG--------------------------------------TCTAC--------AATAT-ATTTTTCT--ATTTATCCAACTCAAGT--G--ATATCTAAGA---AAAAAAGGAA--TAGGAGGGATGATACTCTAG--TTACAATATTTTATT---CTACAAATGTCC--ACTTAGAGATCA
i calJac3.chr16                    C 0 C 0
s saiBol1.JH378158                   9050474 150 -  16265076 ACAAGCAACTC--AGGT--AAT-A--CGCATTT-GTCAG-----TATG--------------------------------------TCTAT--------AATAT-ATTTTTCT--ATTTATCCGACTCAGGT--G--ATATCTAAGA---AAAAAAGGAA--TAGGAGGGATGATACTCTAG--TTACAATATTTTATT---CTACAAATGTCT--ATTTAGAAATCA
i saiBol1.JH378158                 C 0 C 0
s micMur1.scaffold_4913                90094 146 +    135929 ACAAGCAACTC--AGGT--AAT-A--CACATTT-GTCAA-----TATG--------------------------------------TCTAC--------AATGC-AGTTTTCT--ATTATTCCGACTCAGAT--A--ATATAGAAG----GAAAAGAAAA--TATAAGAG---ATATCCTAG--TTACAATGCTTTAAT---CCAGCAGTGTCC--ACCTAGAACTCG
i micMur1.scaffold_4913            C 0 C 0
s otoGar3.GL873523                  39380391 122 -  47749213 ACAAACAGCTC--CGGT--AATAA--TGCATTT-GTCAA-----TACA--------------------------------------GCCAC--------AATGC-AGTTTTTT--ATTCTTCCGACTTAGGT--A--ATATATAAG----AAAAAGAAAA--TAGAAGGG---ACATTCTA----------------------------TG-CC--ACCTAG-ATTCA
i otoGar3.GL873523                 C 0 C 0
s tupBel1.scaffold_119809.1-330533     18574 150 +    330533 ACAAGCAACTC--AGAT--AAT-A--TGCATTT-GTCAA-----CAC---------------------------------------TCGAA--------AATAC-ATTTTAAA--ATTCATTCAACTCAGGT--GTTATATATAAG----GAGAGAAGAA--TACAAGAAATGATATTCTAG--TTAAAATTATTTAAT---TCAGAAACATAC--ATCTAGAACCCA
i tupBel1.scaffold_119809.1-330533 C 0 C 0
s susScr3.chr4                      18486070 151 + 143465943 ACAAGCAACTC--CAGT--AAT-T--TACATTT-GTCAG-----TACT--------------------------------------TGCAC--------ATTAT-GTTTTTCT--ATTGACCCAACTCAGGT--A--TTACAT-GAGAA---AAAGAAAG--CAGTAAAAATGCTATCCTTA--TTAGAATGCTGTAAT---CTAGACTTGTCAGTACCTAGAATTCT
i susScr3.chr4                     C 0 C 0
s vicPac1.scaffold_13                1553976 151 +   2369290 ---AGCAACTC--AGGT--AAT-T--TGCATTT-GTCAA-----TACT--------------------------------------TCTAC--------AATAC-ATTTTTCT--ATTCACTCAACTTAGGT--A--TTATATAAATAA-AAAAAGAAAA--TAGGAGAAATTATATTCTTATTTTACAGTGTTATAAT---CCAGAGATACAT--ACCTAGAATTCT
i vicPac1.scaffold_13              C 0 C 0
s turTru2.JH479543                     73942 148 -    135452 ACAAGTAATTC--TGGT--AAT-T--TACATGT-CA--A-----CACT--------------------------------------TCTAC--------AATAA-GCTTTTCT--GTTCACCCAACTCAGAT--G--TTATATAAATAAGAGAAAGAAAA--CAGGAGAAATGATATCCTCA--TTATAATGCTCTAAT---CCAGAAATGTAT-----CAGAATTTT
i turTru2.JH479543                 C 0 C 0
s oviAri1.chr9                      68470758 145 - 100831284 ACAAGTAACTC--C-GT--AAT-G--TACATTT-GAC-A-----CACT--------------------------------------TCTAC--------AAGAA-GTTTTTCT--ATTCACCCAGCTCAGCT--A--TTATATAGCTAA---AAAGAAAA--GAGGAGAAATTATATCTTCA--TTATAGTGCTATAAT---CCAGAAATGTCT-----TAGANTTNT
i oviAri1.chr9                     C 0 C 0
s bosTau7.chr14                     63542241 146 -  81216349 ACAAGTAACTC--CGGT--AAT-G--TACATTT-GTC-A-----CACT--------------------------------------TCTAC--------AAGAA-GTTTTTCT--GTTCACCCAGCTCATGT--T--TTATATAGATAA---AAAGAAAA--GAGGAGAAATTATATCTTCA--TTATAATGCTATAAT---CCATAAATGTCT-----TAGAATTTT
i bosTau7.chr14                    C 0 C 0
s felCat5.chrF2                     64502520 149 +  82763536 ACAAGCAACTG--AGGT--AAT-A--TACTTTT-GTCAA-----TGTA--------------------------------------TCTAC--------AAGAC-AGTTTTCT--ATTCCCC----TCAGGA--A--ATACATAAATTAAAAAATGTGAA--TAGGAGTAATGATATTCTAA--TGACAATGCTATCAT---CCAGAAATATTT--ACCTAGAATTCT
i felCat5.chrF2                    C 0 C 0
s canFam3.chr13                     20338587 148 +  63241923 ACAAGCAACTC--AGGT--AAT-A--CG--TTT-GTTAA-----TAAA--------------------------------------TCTAC--------AAGAC-ATTTTGCT--ATTCCTCCAATTCAGGAGGA--ATACGTAA-----CAGAAGTGAA--TAGAAGGGTTCATATTCTAA--TTCCAGTGCTGTCAT---TGAGAAATGTTG--ACCTAGAATTCT
i canFam3.chr13                    C 0 C 0
s ailMel1.GL193711.1                  156641 156 -    529242 ACCGGCAACTC--AGGT--AAT-A--TG--TCT-GCATATTGTTTGTA--------------------------------------TCTAC--------AAGAC-ATTTTTCT--ATTCCCCCAGCTCAGGA--A--ATACATAAGTAAGAAACAGTGAA--TAGGAGTGTTGATATTCTAA--TTCCAGTGCCATCAT---TGAGAGATGTTA--ACCTAGAATTCC
i ailMel1.GL193711.1               C 0 C 0
s equCab2.chr9                      64366552 153 +  83561422 ACAAGCAACCC--AGAGCAAAT-A--CA--TTT-GTCAA-----TACA--------------------------------------TCTAC--------TATAT-ATTTTTCT--ATTCACCCAATTCAGGT--A--ATATATAAATAATAAAAAGAGAA--TAGGTGTAATGGTATCCTGA--TTACAATGCTATAAT---CCAGAAATGTCT--ACCTAGAATTCT
i equCab2.chr9                     C 0 C 0
s myoLuc2.GL429784                   8893506 155 +  14577598 ACAAGCAACTC--AGGT--AAT-AAGTG--TTT-ATCAA-----TAAA--------------------------------------TCTACAATACATCAATAC-ATGTTTCT--ATTCACCCAACTCAGGT--T--ACATATATGTATTTTTCAAT--------GAGTGATGATATCCTAA--TTGTAACACTATAAT---CCAGAAATGTCT--ACTTAGACTTCT
i myoLuc2.GL429784                 C 0 C 0
s pteVam1.scaffold_9062                53894  94 +     66173 ACAAGCAACTC--AGGT--AAT-A--TG--TAA-ATTAA-----AGAG---------------------------------------------------AATAA-------------------------------------------------------------GAGTGATGATATCCTAA--TTACAATGCTGTAAT---CCAGAAATGTCT--GTTTAGAATTCT
i pteVam1.scaffold_9062            C 0 C 0
s loxAfr3.scaffold_8                67684565 150 +  85640724 ACAAGAAATTC--AGGT--GAC-A--TACATTT-GTCGA-----TATA--------------------------------------TTTAC--------AATAC-ATTTTTCTACATACTTCCAATTCAAGT--A--ATACATTAATAAGAAAAA-------GAGAACGGAAGATATTCTAG--TTACAAAGTTTTAAT---CTTGAAACGTCC--ATCTAGGATACT
i loxAfr3.scaffold_8               C 0 C 0
s proCap1.scaffold_5125                53845 141 +     62060 ATGAGTAATTC--TGCT--AAC-A--TAGATTT-GC------------------------------------------------------C--------AATAT-ATTTTTCTATGGACTCCCAACTCAAGT--A--ATAAGTTAAGAAGAAAAA---AG--GAGAAGGGAAGATATTCCAG--TTACAAGTTTTTAAT---CTTGAAATGTCC--ACCAAAGATACT
i proCap1.scaffold_5125            C 0 C 0
s triMan1.JH594628                   9783945 150 +  24477914 ACAAGTAACTC--AGGT--AAC-A--TACATTT-GTCAA-----TATA--------------------------------------TT-------------TAC-ATTTTTCTACATACCCCCCACTCAAGT--A--ATACATTAATAAGAAAAAGAGAA--TAGAAAGGAAGATATTCTAG--TCCCAGTGTTTTAAT---CTTGAAATGTCC--ATCTAGGATATT
i triMan1.JH594628                 C 0 C 0
s dasNov3.JH579962                   3296593 139 +   3334091 GAAAACAACTCTCTGAT--AAT-A--TATATTT-GTCAA-----TACA--------------------------------------TC-------------AACAATTTTCA---ATATGTTCATCTCAAGt--a--atataaaaattaaaaaaa--------aGAAGGAATGCTATTCTAG--TTAAAATACTTTA--------GAACTGTCC--TCTTAGAACTCC
i dasNov3.JH579962                 C 0 C 0
s choHof1.scaffold_1338                24667 128 +     46317 AAAAGCAACTC--------AAT-A--TATATTT-GTCAA-----TACA--------------------------------------TC-------------TAT-ATTTTCA---GTACGTCTGGCTCAAAT--A--ATATTAAAGTAAGAAAAA--TAA--TAGAAGGAATTCTAGTTTAG--TTACAA----------------AATAGTCC--TGTTAGAATTCT
i choHof1.scaffold_1338            C 0 C 0
e ochPri2.scaffold_3008                37098 2113 +    168654 I
e echTel1.scaffold_246123               8997 1826 -     12816 I
e gorGor3.chr8                     121284328 8675 + 145327772 T
e melGal1.chr3                      88078472 9551 + 100405168 I
e sarHar1.chr2_GL841388_random        481984 12896 +   1237177 I
e melUnd1.JH556481                    782640 58368 +   3508697 I
e monDom5.chr3                     395438024 14746 + 527952102 I
e chrPic1.JH584538                    404458 7740 +   8176890 I
e galGal4.chr2                     136949488 65088 + 148809762 I

a score=86806.000000
s mm10.chr15                        56691644 13 + 104043685 GGT----TTG--TCT------AGAA
s rn5.chr7                          97078672 13 + 143501887 GGT----TTG--TCT------AGAA
i rn5.chr7                         C 0 C 0
s dipOrd1.scaffold_76283                 807 18 +      5145 AAA----TTA--TCTGTCC-CAGAA
i dipOrd1.scaffold_76283           C 0 C 0
s hetGla2.JH602048                   9048407 18 -  42145720 GAA----TTA--TTTGTCC-CAGGG
i hetGla2.JH602048                 C 0 C 0
s cavPor3.scaffold_95                5257612 18 -   5884597 GAA----TTA--TCTGCCC-CAGAG
i cavPor3.scaffold_95              C 0 C 0
s speTri2.JH393280                  21200026 16 -  46620681 GAA----TTT--TTT--TT-CAGAA
i speTri2.JH393280                 C 0 C 0
s oryCun2.chr3                     137516975 13 + 155691105 GAA----TTA--CAT------GGAA
i oryCun2.chr3                     C 0 I 386
s hg19.chr8                        122650832 18 + 146364022 GAA----TTA--TCTGTCC-CAGAA
i hg19.chr8                        C 0 C 0
s panTro4.chr8                     120287862 18 + 143986469 GAA----TTA--TCTGTCC-CAGAA
i panTro4.chr8                     C 0 C 0
s ponAbe2.chr8                     129325883 18 + 153482349 GAG----TTA--TCTGTCC-CAGAA
i ponAbe2.chr8                     C 0 C 0
s nomLeu2.GL397267                  35743633 18 +  48819562 GAA----TTA--TCTGTCC-CAGAA
i nomLeu2.GL397267                 C 0 C 0
s rheMac3.chr8                     126565163 17 + 150158102 GAA----TTA--TCT-TCC-CAGAA
i rheMac3.chr8                     C 0 C 0
s papHam1.scaffold1185                 78380 17 +    226188 GAA----TTA--TCT-TCC-CAGAA
i papHam1.scaffold1185             C 0 C 0
s calJac3.chr16                     23628614 18 -  96796970 GAA----TTA--TCTGTCT-CAGAA
i calJac3.chr16                    C 0 C 0
s saiBol1.JH378158                   9050624 19 -  16265076 GAA----TTA--TCTGTCTCCAGAA
i saiBol1.JH378158                 C 0 C 0
s micMur1.scaffold_4913                90240 18 +    135929 AAA----TTA--TTTGTTC-CAGAA
i micMur1.scaffold_4913            C 0 C 0
s otoGar3.GL873523                  39380513 18 -  47749213 AAA----TTA--TTTGTTC-CAGAA
i otoGar3.GL873523                 C 0 C 0
s tupBel1.scaffold_119809.1-330533     18724 18 +    330533 GAA----TTA--TTTGTCG-TAGGA
i tupBel1.scaffold_119809.1-330533 C 0 C 0
s susScr3.chr4                      18486221 18 + 143465943 AAA----TTA--TTTGTCC-CAATA
i susScr3.chr4                     C 0 C 0
s vicPac1.scaffold_13                1554127 14 +   2369290 GA----------TTTGTCC-CAATA
i vicPac1.scaffold_13              C 0 C 0
s turTru2.JH479543                     74090 18 -    135452 GAA----TTA--TTAGCCC-CAATA
i turTru2.JH479543                 C 0 C 0
s oviAri1.chr9                      68470903 18 - 100831284 GAA----TNN--NTANTCC-CAANA
i oviAri1.chr9                     C 0 C 0
s bosTau7.chr14                     63542387 18 -  81216349 GAA----TCA--TTAGTCC-CAATA
i bosTau7.chr14                    C 0 C 0
s felCat5.chrF2                     64502669 17 +  82763536 GAA-----TA--CTTGTTC-CAAAA
i felCat5.chrF2                    C 0 C 0
s canFam3.chr13                     20338735 17 +  63241923 GAA-----TA--CTTGTCC-CAAAA
i canFam3.chr13                    C 0 C 0
s ailMel1.GL193711.1                  156797 17 -    529242 GAA-----TA--CTTGTTC-CAAAA
i ailMel1.GL193711.1               C 0 C 0
s equCab2.chr9                      64366705 18 +  83561422 GAA----TTA--TTTGTGC-CAAAA
i equCab2.chr9                     C 0 C 0
s myoLuc2.GL429784                   8893661 19 +  14577598 AAAG---TTA--TTTGTTC-CAAAA
i myoLuc2.GL429784                 C 0 C 0
s pteVam1.scaffold_9062                53988 18 +     66173 GAA----TTA--TTTAGTC-CTAAA
i pteVam1.scaffold_9062            C 0 C 0
s loxAfr3.scaffold_8                67684715 22 +  85640724 GAATTGTTTG--TTGGTCC-AACCA
i loxAfr3.scaffold_8               C 0 C 0
s proCap1.scaffold_5125                53986 23 +     62060 GAAGCATTTGT-TTTTTCC-AGCAG
i proCap1.scaffold_5125            C 0 C 0
s triMan1.JH594628                   9784095 22 +  24477914 GTATTATTTG--TTGGTCC-AACAA
i triMan1.JH594628                 C 0 C 0
s dasNov3.JH579962                   3296732 18 +   3334091 A----ATTTA--TTTGTGT-CAGAA
i dasNov3.JH579962                 C 0 C 0
s choHof1.scaffold_1338                24795 22 +     46317 GAAATATTTA--TTTTTGT-CAGAA
i choHof1.scaffold_1338            C 0 C 0
s danRer7.chr18                     16694026 13 +  49877488 ----------ggtgggttt-taca-
i danRer7.chr18                    N 0 C 0
e ochPri2.scaffold_3008                37098 2113 +    168654 I
e echTel1.scaffold_246123               8997 1826 -     12816 I
e gorGor3.chr8                     121284328 8675 + 145327772 T
e melGal1.chr3                      88078472 9551 + 100405168 I
e sarHar1.chr2_GL841388_random        481984 12896 +   1237177 I
e melUnd1.JH556481                    782640 58368 +   3508697 I
e monDom5.chr3                     395438024 14746 + 527952102 I
e chrPic1.JH584538                    404458 7740 +   8176890 I
e galGal4.chr2                     136949488 65088 + 148809762 I

a score=67724.000000
s mm10.chr15                        56691657 18 + 104043685 TTGC-AAACAC--GTGACACA---
s rn5.chr7                          97078685 18 + 143501887 TTGC-GAACAC--ACAACTCA---
i rn5.chr7                         C 0 C 0
s dipOrd1.scaffold_76283                 825 18 +      5145 Ctac-agacat--atacatta---
i dipOrd1.scaffold_76283           C 0 C 0
s hetGla2.JH602048                   9048425 20 -  42145720 CTGC-AAATGCATATACAACA---
i hetGla2.JH602048                 C 0 C 0
s cavPor3.scaffold_95                5257630 18 -   5884597 CTGC-GAATGC--ACACAGCA---
i cavPor3.scaffold_95              C 0 C 0
s speTri2.JH393280                  21200042 19 -  46620681 -TGC-AAAGGCATACACAATA---
i speTri2.JH393280                 C 0 C 0
s oryCun2.chr3                     137517374 20 + 155691105 CTGC-AAACGCATACACACCT---
i oryCun2.chr3                     I 386 C 0
s hg19.chr8                        122650850 20 + 146364022 TTGG-AAACACATACAAAACA---
i hg19.chr8                        C 0 C 0
s panTro4.chr8                     120287880 20 + 143986469 TTGG-AAACACATACAAAACA---
i panTro4.chr8                     C 0 C 0
s ponAbe2.chr8                     129325901 19 + 153482349 TTGG-AAACACATAC-AAACA---
i ponAbe2.chr8                     C 0 C 0
s nomLeu2.GL397267                  35743651 20 +  48819562 TTGG-AAACACATACAAAACA---
i nomLeu2.GL397267                 C 0 C 0
s rheMac3.chr8                     126565180 18 + 150158102 CTGG---ACACATACAAGACA---
i rheMac3.chr8                     C 0 C 0
s papHam1.scaffold1185                 78397 18 +    226188 TTGG---ACACATACAAGACA---
i papHam1.scaffold1185             C 0 C 0
s calJac3.chr16                     23628632 20 -  96796970 CTGG-AAACACATACAAGACA---
i calJac3.chr16                    C 0 C 0
s saiBol1.JH378158                   9050643 20 -  16265076 CTGG-AAACACATACAAGACA---
i saiBol1.JH378158                 C 0 C 0
s micMur1.scaffold_4913                90258 14 +    135929 TTCC-AAACACA------ACA---
i micMur1.scaffold_4913            C 0 C 0
s otoGar3.GL873523                  39380531 14 -  47749213 TTGC-AAACACA------ACA---
i otoGar3.GL873523                 C 0 C 0
s tupBel1.scaffold_119809.1-330533     18742 20 +    330533 TTGC-AAACATGTACACAGCA---
i tupBel1.scaffold_119809.1-330533 C 0 C 0
s susScr3.chr4                      18486239 14 + 143465943 TTCCTTCATGCATA----------
i susScr3.chr4                     C 0 C 0
s vicPac1.scaffold_13                1554141 20 +   2369290 -TGTTTAATGCATACACAACA---
i vicPac1.scaffold_13              C 0 C 0
s turTru2.JH479543                     74108 20 -    135452 TTGCTTAATGCATACACAAC----
i turTru2.JH479543                 C 0 C 0
s oviAri1.chr9                      68470921 21 - 100831284 TTNNNTNNNNCATNCACAACA---
i oviAri1.chr9                     C 0 C 0
s bosTau7.chr14                     63542405 21 -  81216349 TTGCTTAATTCATTCACAACA---
i bosTau7.chr14                    C 0 C 0
s felCat5.chrF2                     64502686 20 +  82763536 TTGC-GAACTCACACATGACA---
i felCat5.chrF2                    C 0 C 0
s canFam3.chr13                     20338752 20 +  63241923 CTGA-AAACTCACACATGACA---
i canFam3.chr13                    C 0 C 0
s ailMel1.GL193711.1                  156814 20 -    529242 CTGC-AAACTCACACATGACA---
i ailMel1.GL193711.1               C 0 C 0
s equCab2.chr9                      64366723 20 +  83561422 TTGC-TAATGCATACACAACA---
i equCab2.chr9                     C 0 C 0
s myoLuc2.GL429784                   8893680 20 +  14577598 TTGC-AAATGCATACACAACA---
i myoLuc2.GL429784                 C 0 C 0
s pteVam1.scaffold_9062                54006 20 +     66173 TTGC-AAACACGTATACGACG---
i pteVam1.scaffold_9062            C 0 C 0
s loxAfr3.scaffold_8                67684737 15 +  85640724 TTGG-CAACACACACA--------
i loxAfr3.scaffold_8               C 0 C 0
s proCap1.scaffold_5125                54009 15 +     62060 CTGG-AAACACACGCC--------
i proCap1.scaffold_5125            C 0 I 510
s triMan1.JH594628                   9784117 15 +  24477914 CTGG-AAAGACACACG--------
i triMan1.JH594628                 C 0 I 2
s dasNov3.JH579962                   3296750 15 +   3334091 TTGG-AAACATATCCA--------
i dasNov3.JH579962                 C 0 I 5
s choHof1.scaffold_1338                24817 15 +     46317 TTGG-AAACACATAGA--------
i choHof1.scaffold_1338            C 0 I 5
s danRer7.chr18                     16694039 17 +  49877488 -------gtgTATATATGTCAATA
i danRer7.chr18                    C 0 C 0
e ochPri2.scaffold_3008                37098 2113 +    168654 I
e echTel1.scaffold_246123               8997 1826 -     12816 I
e gorGor3.chr8                     121284328 8675 + 145327772 T
e melGal1.chr3                      88078472 9551 + 100405168 I
e sarHar1.chr2_GL841388_random        481984 12896 +   1237177 I
e melUnd1.JH556481                    782640 58368 +   3508697 I
e monDom5.chr3                     395438024 14746 + 527952102 I
e chrPic1.JH584538                    404458 7740 +   8176890 I
e galGal4.chr2                     136949488 65088 + 148809762 I

a score=564788.000000
s mm10.chr15                        56691675 106 + 104043685 TA----------------------ACATATATACCAC---------------ATCTGTGCT--TTA----------T----------------GTCTAC------AAATTTTCA--------------CTG-aaaattaa----------------------aatgaaatta------aaattaaaaaCCT--TT-C----TATCT---ACT-AG-------AACACCTTTGGGAAA--A
s rn5.chr7                          97078703  74 + 143501887 TA----------------------ACAT-----------------------------------------------------------------GTCTCT------TAATTTTCA--------------ATG-AAAAATGT----------------------AA-------------------AAGAACCT--TT-C----TATAT---ACT-AG------TAACACCTGTGGGAGAGGA
i rn5.chr7                         C 0 C 0
s dipOrd1.scaffold_76283                 843 155 +      5145 tatatagtgtgcctgtaatataatatatacacattat---------------atgcacaca--tta----------t----------------gtatat------tgatatgcatgtagtatatttgtatg-tatatata----------------------aatatgcatacacaCCAGATTAAGTATTT--TA-T----AATGT---ATT-AGCTTTCATAGAAAATGTAAAAGA--A
i dipOrd1.scaffold_76283           C 0 C 0
s hetGla2.JH602048                   9048445 106 -  42145720 TG----------------------ATATACACACCACA--------------ATAAGTACA--GCA----------TTAAACACAATAGGGAAAGCATT------AAACTTTCA--------------TTG-AAAATATA----------------------AA------------------------ATT--AC-C----AAACA---GTT-GA------AGAAACCCGTGGTAAA--G
i hetGla2.JH602048                 C 0 I 1
s cavPor3.scaffold_95                5257648  90 -   5884597 GG----------------------ATATACATACCTTG--------------ATGGGTGCT--GCA----------C----------------AGCCTT------ACACTTCCA--------------TTG-AAAATATA----------------------AA------------------------ACT--AC-C----GAACA---ACT-AC------AGAAACCAGTGGTGAA--A
i cavPor3.scaffold_95              C 0 I 34
s speTri2.JH393280                  21200061  95 -  46620681 TA----------------------GTATACATGCCAAA--------------ATAGGTATT--TTA----------A----------------GGTATT------AAACTTTCA--------------TTG-AAAGTGAA----------------------AA-------------------AAAGAATA--GC-C----AAGCT---ACT-AG------GGAAAACTTCCGTGAA--A
i speTri2.JH393280                 C 0 I 2
s oryCun2.chr3                     137517394  93 + 155691105 TT----------------------ATACACATTCCACA--------------GGAGGTACG--TTA----------A----------------AGCATT------CAGCTTTCA--------------CAG-AAAATGTA----------------------GA---------------------GGAATG--TC-C----AAACT---ACC-AG------GAAAACCTTTGGTAGA--G
i oryCun2.chr3                     C 0 I 2
s hg19.chr8                        122650870  91 + 146364022 TA----------------------ATATATA-AACGCA--------------ACAGGTAAC--TTA----------A----------------AGTGTT------AAATTGTCA--------------TTG-AAAATGTA----------------------AA---------------------AGAATC--GC-C----AAACT---ATT-GG------GAAAACTTTTGGTGGA---
i hg19.chr8                        C 0 I 3
s panTro4.chr8                     120287900  91 + 143986469 TA----------------------ATATATA-AACGCA--------------ACAGGTAAC--TTA----------A----------------AGTGTT------AAATTGTCA--------------TTG-AAAATGTA----------------------AA---------------------AGAATC--GC-C----AAACT---ATT-GG------GAAAACTTTTGGTGGA---
i panTro4.chr8                     C 0 I 3
s ponAbe2.chr8                     129325920  91 + 153482349 TA----------------------ATATATA-AACGCA--------------ACAGGTACC--TTA----------A----------------AGTGTT------AAATTGTCA--------------TTG-AAAATGTA----------------------AA---------------------AGAATC--GC-C----AAACT---ATT-GG------GAAAACTTTTGGTGGA---
i ponAbe2.chr8                     C 0 I 3
s nomLeu2.GL397267                  35743671  91 +  48819562 TA----------------------ATATATA-AATGCA--------------ACAGGTACC--TTG----------A----------------AGTGCT------AAATTGCCA--------------TTG-AAAATGTA----------------------AA---------------------AGAATC--GC-C----AAACT---ATT-GG------GAAAACTTTTGGTGGA---
i nomLeu2.GL397267                 C 0 I 3
s rheMac3.chr8                     126565198  91 + 150158102 TA----------------------ATCTATC-AATGCA--------------ACAGGTACC--TTA----------A----------------AGGGTT------AAATTGTCA--------------TTG-GAAATGTA----------------------AA---------------------AGAATC--CT-G----AAACT---ATT-GG------CAAAACTTTTGGTGGA---
i rheMac3.chr8                     C 0 I 3
s papHam1.scaffold1185                 78415  91 +    226188 TA----------------------ATCTATC-AATGCA--------------ACAGGTACC--TTA----------A----------------AGGGTT------AAATTGTCA--------------TTG-GAAATGTA----------------------AA---------------------AGAATC--CT-G----AAACT---ATT-GG------CAAAACTTTTGGTGGA---
i papHam1.scaffold1185             C 0 I 3
s calJac3.chr16                     23628652  88 -  96796970 TA----------------------ATATATA-AACACA--------------GT-AGTACT--TTG----------A----------------AGTGTT------AAATTGTCA--------------TTG-AAAATGTA----------------------AA---------------------AGAATC--GC-C----AAACT---CTC-AG------GAAAACT--TGGTGGA---
i calJac3.chr16                    C 0 I 3
s saiBol1.JH378158                   9050663  91 -  16265076 TA----------------------ATATATA-AACACA--------------ATGAGTACT--TTG----------C----------------AGTGTT------AAATTGTCA--------------TTG-AAAATGTA----------------------AA---------------------AGAATC--GC-C----AAACT---CTC-AG------GAAAACTTCTGGTGGA---
i saiBol1.JH378158                 C 0 I 3
s micMur1.scaffold_4913                90272  93 +    135929 TA----------------------ATATACATACCACA--------------ATAAGTACG--TTA----------A----------------AACGTT------AAACTGTCA--------------TTG-AAAATGTG----------------------AA---------------------CAAATT--ATGC----AAACT---ACT-AG------GACAACCCTTGGTGGA---
i micMur1.scaffold_4913            C 0 I 3
s otoGar3.GL873523                  39380545  88 -  47749213 CA----------------------ATATCTATACCACA--------------AT-AGTACT--TTA----------A----------------AATGTT------AAACTTTCA--------------CTG-AAAACGTG----------------------AA---------------------CAAATT--GT-C----AA------ACT-AG------GACAATCCGTGGTGCA---
i otoGar3.GL873523                 C 0 I 3
s tupBel1.scaffold_119809.1-330533     18762  92 +    330533 TA----------------------ATAGACACAGCATG--------------ATAGATATT--TTA----------A----------------AGCATT------AAACTGTCA--------------TTA-AAAATGTA----------------------AA---------------------AGAATA--GC-A----GAACT---ACC-AG------GAAAACCTTTGGTGGC---
i tupBel1.scaffold_119809.1-330533 C 0 I 3
s susScr3.chr4                      18486253  83 + 143465943 --------------------------ATACGCATAGTA--------------AAATAGGTACTTTA----------A----------------AGAGTT------TAA-AACTA--------------TTG--------C----------------------AT---------------------AGAATA--GC-CG---AAAAT---ACT-AG------GAAGACCTTTGGTGGA---
i susScr3.chr4                     C 0 I 3
s vicPac1.scaffold_13                1554161  91 +   2369290 TA----------------------ATATGCATATTACA--------------AAAGGTACT--TTA----------A----------------AGAGTT------AAA-CTTTA--------------TTG-AAAATTTA----------------------AA---------------------AGAATA--GC-C----GAAAT---ACT-AA------GAAAACTTTTGATGGA---
i vicPac1.scaffold_13              C 0 I 3
s turTru2.JH479543                     74128  88 -    135452 -------------------------TACATATACTAAA--------------ATTTGTACT--TCA----------A----------------AGAGTT------AAA-CTTTA--------------TTG-AAAATTTA----------------------AA---------------------AGAATA--GC-C----AAAAT---ATT-AG------GAAAACCTTTGGTGGG---
i turTru2.JH479543                 C 0 I 3
s oviAri1.chr9                      68470942  92 - 100831284 TA----------------------ATATANANACTAAA--------------ATNNNNNNT--TTA----------A----------------AGAGAG------AAATTTTTA--------------TTG-AAAATATA----------------------AA---------------------AGAATG--GG-C----AAAAT---ACT-AG------GAAAACTTTTGATGGA---
i oviAri1.chr9                     C 0 I 3
s bosTau7.chr14                     63542426  84 -  81216349 TA----------------------ATATATATACTAAA--------------AT-----TT--GTA----------G----------------AGAGTC------AAA---CTA--------------TTG-AAAATTTA----------------------AA---------------------AGAATA--GC-C----AAAGT---ATT-TG------GAAAACCTCCGCTGGA---
i bosTau7.chr14                    C 0 I 3
s felCat5.chrF2                     64502706  89 +  82763536 TA----------------------ATATAGACACTAAC--------------ATAGGCACG--TTA----------A----------------AGAGTT------AACCTTTTA--------------ATG-AAAACGTA----------------------AA---------------------AGGG-------C----CAAGA---AGTGGG------AAAAACCTGAGATGTG---
i felCat5.chrF2                    C 0 I 3
s canFam3.chr13                     20338772  81 +  63241923 TA----------------------AC-----TACTAAA--------------ATAGGCACT--TTA----------A----------------AGAGTT------AA-CTTCTA--------------TGG-AAAATCGA----------------------AA---------------------ATAG-------C----CAAGT---AGT-GA------AAAGACCTGTAATG-A---
i canFam3.chr13                    C 0 I 3
s ailMel1.GL193711.1                  156834  87 -    529242 TA----------------------ATATAAATACTAAA--------------ATAAGCACT--TTA----------A----------------AGAGTT------AACCTTTTA--------------TTG-AAAATGTA----------------------AA---------------------ATAG-------C----CAAGT---GGT-GA------AAAGACCTTCAGTG-A---
i ailMel1.GL193711.1               C 0 I 3
s equCab2.chr9                      64366743  91 +  83561422 TA----------------------GTATACATACAAAA--------------ATCTGTACT--TTA----------A----------------AGAGTT----TCAA-CTTTTA--------------TTG-AAAATGTA----------------------AA---------------------AGAATA--AC-C----AAAAT---ACT-AG------GAAAACCTTTGATG-----
i equCab2.chr9                     C 0 C 0
s myoLuc2.GL429784                   8893700  89 +  14577598 TA----------------------ATATACATACTAAA--------------ATAGGTACT--TTA----------A----------------AGAGTT------AAACTTTTA--------------TTG-AAAATGTA----------------------AA---------------------AGAATA--GC-C----AAAAT---ACT-AG------GAAAACT---GATGGA---
i myoLuc2.GL429784                 C 0 I 2
s pteVam1.scaffold_9062                54026  92 +     66173 TA----------------------ATATACATATTAAA--------------ATAGGTACT--TT-----------A----------------AGAGTT------AAGCTTTTA--------------TTG-AAAGTGTA----------------------AA---------------------AGAAAAGTGC-C----AAAAT---ACT-AG------GAAACCTTG-GATGGG---
i pteVam1.scaffold_9062            C 0 I 3
s loxAfr3.scaffold_8                67684752 108 +  85640724 TT----------------------ATATACATACTACA--------------ACAGACACT--TTG-CAATTCTTAA----------------AGCGTT------AAACCATCA--------------CTG-AAAATGTA----------------------AA---------------------AAAAAA--AA-GTGAAAAAATAAAACT-AG------GAAAACCTTTGGAAGA---
i loxAfr3.scaffold_8               C 0 I 3
s triMan1.JH594628                   9784134 109 +  24477914 TT----------------------ATATACATACTACA--------------ATAGATACT--TTG-CAATTCTTAA----------------AGCGTT------AAACTGTAA--------------CTG-AAAATATA----------------------AA--------------------TTAAAAA--AA-GGGAAAAAATAAAACT-AG------GAAAACCTTTGGAAGA---
i triMan1.JH594628                 I 2 I 3
s dasNov3.JH579962                   3296770 100 +   3334091 TA----------------------ATATACATAC-ACA--------------ACAAATACT--TAGTTAATTCTTTA----------------AAGAGT------TAACTTTCA--------------CTG-AAAATGTA----------------------AA----------------------AAAAA--TA-G----CAAAT---ACT-AG------GACCATCCTTGGTGGA---
i dasNov3.JH579962                 I 5 I 3
s choHof1.scaffold_1338                24837 101 +     46317 TA----------------------ATATACATACTACC--------------ATAGATACT--TTG-CAATTCTTTA----------------AAGAGT------TAACTTTCA--------------CTG-ACAATGTG----------------------AA---------------------TAGCAA--AA-G----AAAAT---ACT-AG------GACCACCTTAGGTGGA---
i choHof1.scaffold_1338            I 5 I 3
s danRer7.chr18                     16694056 121 +  49877488 TT----------------------ACATGTACAGCACCACTTTTTTTGCTATATATGTA-T--TTA----------C----------------AGAATTGTATGTATATCTTTA--------------CTGTAAAATATAGTCATTTTCACAATTCAACTTTAA---------------------TGTATA--GT------AACAT---ACC-GC------AAAA---------------
i danRer7.chr18                    C 0 C 0
e ochPri2.scaffold_3008                37098 2113 +    168654 I
e echTel1.scaffold_246123               8997 1826 -     12816 I
e gorGor3.chr8                     121284328 8675 + 145327772 T
e melGal1.chr3                      88078472 9551 + 100405168 I
e sarHar1.chr2_GL841388_random        481984 12896 +   1237177 I
e melUnd1.JH556481                    782640 58368 +   3508697 I
e monDom5.chr3                     395438024 14746 + 527952102 I
e proCap1.scaffold_5125                54024 510 +     62060 I
e chrPic1.JH584538                    404458 7740 +   8176890 I
e galGal4.chr2                     136949488 65088 + 148809762 I

a score=-322616.000000
s mm10.chr15                        56691781 40 + 104043685 TTATTAATATG---------------------------------------------------------CAAGAAAAA--------------CAC----G--ATCTC-------------A--TTTGAAT-TAC
s rn5.chr7                          97078777 38 + 143501887 TTGTTAGTATT---------------------------------------------------------CAA--AACA--------------CAC----G--ATCTG-------------A--TTTGAAT-TAC
i rn5.chr7                         C 0 C 0
s dipOrd1.scaffold_76283                 998 49 +      5145 TAGCCAA-ATA---------------------------------------------------------CTAGGGAAACCTCTAGAT-----CAT----G--ATGGt-------------a--tatatatatat
i dipOrd1.scaffold_76283           C 0 C 0
s hetGla2.JH602048                   9048552 38 -  42145720 ------------------------------------------------------------------------------CGATGGGTTTTTACAC----GGCATCTC-------------AGCTCTGCATGTAA
i hetGla2.JH602048                 I 1 I 8
s speTri2.JH393280                  21200158 39 -  46620681 GGATGGGTATT---------------------------------------------------------CAAAAAAA---------------CAG----T--ATCTC-------------C--GCTGTATATG-
i speTri2.JH393280                 I 2 C 0
s oryCun2.chr3                     137517489 38 + 155691105 CCATAGATATT---------------------------------------------------------CAGAAAAG---------------GAC-------ACCTC-------------A--GCTGTGTGTG-
i oryCun2.chr3                     I 2 C 0
s hg19.chr8                        122650964 37 + 146364022 TGATGGGTACT---------------------------------------------------------CAAAATA----------------CAG----T--ACCTC-------------A--GCTGTAC-TG-
i hg19.chr8                        I 3 C 0
s panTro4.chr8                     120287994 37 + 143986469 TGATGGGTAGT---------------------------------------------------------CAAAATA----------------CAG----T--ACCTC-------------A--GCTGTAC-CG-
i panTro4.chr8                     I 3 C 0
s ponAbe2.chr8                     129326014 37 + 153482349 TGATGGGTACT---------------------------------------------------------CAAAATA----------------CAG----T--ACCTC-------------A--GCTGTAC-TG-
i ponAbe2.chr8                     I 3 C 0
s nomLeu2.GL397267                  35743765 37 +  48819562 TGATGGGTACT---------------------------------------------------------CAAAATA----------------CAG----T--ACCTC-------------A--GCTGTAC-TG-
i nomLeu2.GL397267                 I 3 C 0
s rheMac3.chr8                     126565292 36 + 150158102 TGAT-GGTACT---------------------------------------------------------CAAAATA----------------CAG----T--ACCTC-------------A--GCTGTAC-TG-
i rheMac3.chr8                     I 3 C 0
s papHam1.scaffold1185                 78509 36 +    226188 TGAT-GGTACT---------------------------------------------------------CAAAATA----------------CAG----T--ACCTC-------------A--GCTGTAC-TG-
i papHam1.scaffold1185             I 3 C 0
s calJac3.chr16                     23628743 37 -  96796970 TGATGGGTGCT---------------------------------------------------------CAAAAAC----------------CAG----T--ACCTC-------------A--GCTGTAC-TG-
i calJac3.chr16                    I 3 C 0
s saiBol1.JH378158                   9050757 37 -  16265076 TGATGGGTGCT---------------------------------------------------------CAAAAAC----------------CAG----T--ACCTC-------------A--GCTGTAC-TG-
i saiBol1.JH378158                 I 3 C 0
s micMur1.scaffold_4913                90368 38 +    135929 CAGTGGGTATT---------------------------------------------------------CAAAAAA----------------TAA----T--ACCTC-------------A--GCTGTATGTG-
i micMur1.scaffold_4913            I 3 C 0
s otoGar3.GL873523                  39380636 38 -  47749213 CGGTGGTTATT---------------------------------------------------------CAAAAAA----------------CAG----T--ATCTC-------------C--GCTGGGTGTG-
i otoGar3.GL873523                 I 3 C 0
s tupBel1.scaffold_119809.1-330533     18857 35 +    330533 TGAGGAGTGTT---------------------------------------------------------TCCAAAA----------------C---------ACCTC-------------C--TCTGTATGCG-
i tupBel1.scaffold_119809.1-330533 I 3 C 0
s susScr3.chr4                      18486339 53 + 143465943 CGATAAGTATTAAAAAC----------------------AACCAACCC--------------------CCCAAAT----------------CAG----T--ATCTC-------------A--GCTGGCTCAG-
i susScr3.chr4                     I 3 C 0
s vicPac1.scaffold_13                1554255 50 +   2369290 TGATAAGCATTAAA-------------------------AAACAAAAA--------------------CTAAAAA----------------CAG----T--ACCTC-------------A--GCTGTCTGAG-
i vicPac1.scaffold_13              I 3 C 0
s turTru2.JH479543                     74219 44 -    135452 TGATAAGTATTT-------------------------------AAAAA--------------------AAAAAGA----------------CAG----T--ATTTC-------------A--GCTGCCTGAG-
i turTru2.JH479543                 I 3 C 0
s oviAri1.chr9                      68471037 39 - 100831284 TGACGGCTATTT--------------------------------------------------------AAAAAAA----------------CAG----T--ATATC-------------A--ACTGTTTGAA-
i oviAri1.chr9                     I 3 C 0
s bosTau7.chr14                     63542513 38 -  81216349 TAGTAGGCATTT---------------------------------------------------------TAAAAA----------------CAG----T--TTTTC-------------A--GTTGTCAGAA-
i bosTau7.chr14                    I 3 C 0
s felCat5.chrF2                     64502798 38 +  82763536 TGATGGATATT---------------------------------------------------------AAAAATG----------------TAG----C--ACCTC-------------A--GTGGTTCCTG-
i felCat5.chrF2                    I 3 C 0
s canFam3.chr13                     20338856 82 +  63241923 TGATGAGTACTAAAAATGTAGTATCAATCAATAAATGATAAAAATAAA---AAGGATA----------AAAAATG----------------CAG----T--ATCTC-------------A--GTACTTTAAG-
i canFam3.chr13                    I 3 C 0
s ailMel1.GL193711.1                  156924 83 -    529242 TGAGGGGCATTAAAAATGTAGTatgaatgaatgaacga-ataaataaatgTAAAGAT-----------AAAAATG----------------CAG----C--ACCTC-------------A--GTAGTTTGAG-
i ailMel1.GL193711.1               I 3 C 0
s equCab2.chr9                      64366834 42 +  83561422 ----GAGTGTC---------------------------------------TGGGTATT----------CCAAAAA----------------CAG----T--ACCTC-------------A--TCTGTATGAG-
i equCab2.chr9                     C 0 C 0
s myoLuc2.GL429784                   8893791 25 +  14577598 ---TTGCCTTT---------------------------------------------------------TTAAAAA----------------ATA----C--A-------------------------GTGAA-
i myoLuc2.GL429784                 I 2 C 0
s pteVam1.scaffold_9062                54121 38 +     66173 TGATGGACATT---------------------------------------------------------AAACAAA----------------CTG----T--ACCTC-------------G--GCTGTATGAG-
i pteVam1.scaffold_9062            I 3 C 0
s loxAfr3.scaffold_8                67684863 42 +  85640724 TGATGGCTGTT---------------------------------------------------------GGAGAAA----------------CCG----T--ATCTCTTCCTAT------A--AGCTTGT----
i loxAfr3.scaffold_8               I 3 C 0
s triMan1.JH594628                   9784246 42 +  24477914 TAATAGGTATT---------------------------------------------------------GGAGAAA----------------CAG----T--ATCTCTTCCTAT------A--AGCTTGT----
i triMan1.JH594628                 I 3 C 0
s dasNov3.JH579962                   3296873 45 +   3334091 TGATGGGTATT---------------------------------------------------------GGAAAAA----------------CAG----T--A---CTTCTTGTATGAGTA--ATCTTGT----
i dasNov3.JH579962                 I 3 C 0
s choHof1.scaffold_1338                24941 48 +     46317 TGATGGTTATT---------------------------------------------------------GAAAAAA----------------CAT----T--ACCTCTTCTTGTATATGCA--ATCTTGT----
i choHof1.scaffold_1338            I 3 C 0
s danRer7.chr18                     16694177 36 +  49877488 ---------------------------------------------------------CTGTCCTACAGTAAAATA----------------CAGCTCGT--ATTAC-------------A--GTTA-------
i danRer7.chr18                    C 0 C 0
e ochPri2.scaffold_3008                37098 2113 +    168654 I
e echTel1.scaffold_246123               8997 1826 -     12816 I
e gorGor3.chr8                     121284328 8675 + 145327772 T
e cavPor3.scaffold_95                5257738 34 -   5884597 I
e melGal1.chr3                      88078472 9551 + 100405168 I
e sarHar1.chr2_GL841388_random        481984 12896 +   1237177 I
e melUnd1.JH556481                    782640 58368 +   3508697 I
e monDom5.chr3                     395438024 14746 + 527952102 I
e proCap1.scaffold_5125                54024 510 +     62060 I
e chrPic1.JH584538                    404458 7740 +   8176890 I
e galGal4.chr2                     136949488 65088 + 148809762 I

a score=-338178.000000
s mm10.chr15                        56691821 27 + 104043685 T-AATCT-TA-----------------C----------CTAGGAAGAT---GTAAACAT
s rn5.chr7                          97078815 27 + 143501887 T-AATCT-TA-----------------T----------CTAGGAAAAT---GTAAACAT
i rn5.chr7                         C 0 C 0
s dipOrd1.scaffold_76283                1047 28 +      5145 a-tatatata-----------------t----------atatatatat---atacacat
i dipOrd1.scaffold_76283           C 0 C 0
s hetGla2.JH602048                   9048598 26 -  42145720 T-GCCTC-TA----------------------------GAAAAAATGT--AGTAAAGC-
i hetGla2.JH602048                 I 8 C 0
s cavPor3.scaffold_95                5257772 28 -   5884597 T-ACCCT-TA-----------------T----------TCAAAAACAT--AGTAAAAAG
i cavPor3.scaffold_95              I 34 C 0
s speTri2.JH393280                  21200197 37 -  46620681 T-AATTT-TA-----------------TTAAGTGTTTAAAAGGTATGT--AGTAAAAC-
i speTri2.JH393280                 C 0 C 0
s oryCun2.chr3                     137517527  8 + 155691105 T-AAACT-TA-------------------------------------------------
i oryCun2.chr3                     C 0 C 0
s hg19.chr8                        122651001 36 + 146364022 T-AACCT-TATT------AA-----GCT----------CTAGAAAAATGTGGTGAAAAC
i hg19.chr8                        C 0 C 0
s panTro4.chr8                     120288031 36 + 143986469 T-AACCT-TATT------AA-----GCT----------CTAGAAAAATGTGGTGAAAAC
i panTro4.chr8                     C 0 C 0
s ponAbe2.chr8                     129326051 35 + 153482349 T-AATCT-TA-T------AA-----GCT----------CTAGAAAAATGTGGTGAAAAC
i ponAbe2.chr8                     C 0 C 0
s nomLeu2.GL397267                  35743802 36 +  48819562 T-AATCT-TATT------AA-----GCT----------CTAGAAAAATGTGGTGAAAAC
i nomLeu2.GL397267                 C 0 C 0
s rheMac3.chr8                     126565328 35 + 150158102 T-AATCT-TATT------AA-----A-T----------CTAGAAAAATGTGGTGAAAAC
i rheMac3.chr8                     C 0 C 0
s papHam1.scaffold1185                 78545 35 +    226188 T-AATCT-TATT------AA-----A-T----------CTAGAAAAATGTGGTGAAAAC
i papHam1.scaffold1185             C 0 C 0
s calJac3.chr16                     23628780 36 -  96796970 T-AATCT-TAGT------AA-----GCT----------CTAGAAAAATGTGGTAAAAAC
i calJac3.chr16                    C 0 C 0
s saiBol1.JH378158                   9050794 36 -  16265076 T-GATCT-TACT------AA-----GCT----------ATAGAAAAATGTGGTGAAAAC
i saiBol1.JH378158                 C 0 C 0
s micMur1.scaffold_4913                90406 31 +    135929 T-GATAT-TA--------AG-----CCT----------CTAGAAAAAT---GTAAATAA
i micMur1.scaffold_4913            C 0 C 0
s otoGar3.GL873523                  39380674 32 -  47749213 TAAATCT-TA--------AG-----CCT----------CTAGAAAAAT---GTAAAGAT
i otoGar3.GL873523                 C 0 C 0
s tupBel1.scaffold_119809.1-330533     18892 36 +    330533 T-AATCT-GATT------AA-----TCC----------CCTAGAAAATGTAATGAAGAC
i tupBel1.scaffold_119809.1-330533 C 0 C 0
s susScr3.chr4                      18486392 34 + 143465943 T-AAACT-TATCT-----AA-----CCT----------CTAGAAAAATGCACTGAA---
i susScr3.chr4                     C 0 C 0
s vicPac1.scaffold_13                1554305 33 +   2369290 T-ACTTT-TATGT-----AG-----CCT----------CTAGAAAAAT-CAGTGAA---
i vicPac1.scaffold_13              C 0 C 0
s turTru2.JH479543                     74263 34 -    135452 T-AATCT-TATTT-----AG-----CTT----------CTAGAATAATGCAGTGAA---
i turTru2.JH479543                 C 0 C 0
s oviAri1.chr9                      68471076 34 - 100831284 A-AGTCT-TATTT-----AG-----CCT----------CTAGAAAAATATAGTAAA---
i oviAri1.chr9                     C 0 C 0
s bosTau7.chr14                     63542551 39 -  81216349 T-AATCT-TATTTAATTCAG-----CCT----------TTGGAAAAATGCAGTGAA---
i bosTau7.chr14                    C 0 C 0
s felCat5.chrF2                     64502836 34 +  82763536 T-AATCG-TATCT-----AG-----CAA----------CTAGAAAAACGCAGCAAA---
i felCat5.chrF2                    C 0 C 0
s canFam3.chr13                     20338938 34 +  63241923 T-AACCT-TATTT-----AG-----CAT----------CTAGAAAAGCACAGCCAA---
i canFam3.chr13                    C 0 C 0
s ailMel1.GL193711.1                  157007 34 -    529242 T-AATCT-TATTG-----AG-----CAT----------CCAGAAAAACGCAGCGAA---
i ailMel1.GL193711.1               C 0 C 0
s equCab2.chr9                      64366876 34 +  83561422 T-AATCT-TAATA-----AG-----CCT----------CTAGAAAAACGCAGTGAA---
i equCab2.chr9                     C 0 C 0
s myoLuc2.GL429784                   8893816  4 +  14577598 A-ACT------------------------------------------------------
i myoLuc2.GL429784                 C 0 C 0
s pteVam1.scaffold_9062                54159 25 +     66173 T-ACTCT-CGTTT-----AC-----CCT----------CTAGCAA---------AA---
i pteVam1.scaffold_9062            C 0 C 0
s loxAfr3.scaffold_8                67684905 28 +  85640724 ----------------TAAG-----CCT----------CTAGAAAATTGTAGTGAAAAC
i loxAfr3.scaffold_8               C 0 C 0
s triMan1.JH594628                   9784288 28 +  24477914 ----------------GAAG-----CCT----------CTAAAAAAATGTAGTGAAAAC
i triMan1.JH594628                 C 0 C 0
s dasNov3.JH579962                   3296918 27 +   3334091 ----------------TAAG-----CTT----------CTAGAAAATTGTAGTG-AAGT
i dasNov3.JH579962                 C 0 C 0
s choHof1.scaffold_1338                24989 28 +     46317 ----------------TAAGC----CCT----------CTAGAAAAATGCAATG-AAAC
i choHof1.scaffold_1338            C 0 C 0
s danRer7.chr18                     16694213 20 +  49877488 --------------------AATACTGT----------TTACAAAAATCG---------
i danRer7.chr18                    C 0 C 0
e ochPri2.scaffold_3008                37098 2113 +    168654 I
e echTel1.scaffold_246123               8997 1826 -     12816 I
e gorGor3.chr8                     121284328 8675 + 145327772 T
e melGal1.chr3                      88078472 9551 + 100405168 I
e sarHar1.chr2_GL841388_random        481984 12896 +   1237177 I
e melUnd1.JH556481                    782640 58368 +   3508697 I
e monDom5.chr3                     395438024 14746 + 527952102 I
e proCap1.scaffold_5125                54024 510 +     62060 I
e chrPic1.JH584538                    404458 7740 +   8176890 I
e galGal4.chr2                     136949488 65088 + 148809762 I

a score=-245462.000000
s mm10.chr15                        56691848 7 + 104043685 TAA----GTTT
s rn5.chr7                          97078842 7 + 143501887 TGA----GTTT
i rn5.chr7                         C 0 C 0
s dipOrd1.scaffold_76283                1075 7 +      5145 tat----atTT
i dipOrd1.scaffold_76283           C 0 I 8
s hetGla2.JH602048                   9048624 7 -  42145720 TAG----TTTT
i hetGla2.JH602048                 C 0 C 0
s cavPor3.scaffold_95                5257800 7 -   5884597 TAG----CTTT
i cavPor3.scaffold_95              C 0 C 0
s speTri2.JH393280                  21200234 7 -  46620681 TAA----TTTT
i speTri2.JH393280                 C 0 C 0
s oryCun2.chr3                     137517535 3 + 155691105 --------TTA
i oryCun2.chr3                     C 0 C 0
s ochPri2.scaffold_3008                39211 7 +    168654 TAA----ACTA
i ochPri2.scaffold_3008            I 2113 C 0
s hg19.chr8                        122651037 7 + 146364022 TAA----TTTA
i hg19.chr8                        C 0 C 0
s panTro4.chr8                     120288067 7 + 143986469 TAA----TTTA
i panTro4.chr8                     C 0 C 0
s ponAbe2.chr8                     129326086 7 + 153482349 TAA----TTTA
i ponAbe2.chr8                     C 0 C 0
s nomLeu2.GL397267                  35743838 7 +  48819562 TAA----TTTA
i nomLeu2.GL397267                 C 0 C 0
s rheMac3.chr8                     126565363 2 + 150158102 ---------TA
i rheMac3.chr8                     C 0 C 0
s papHam1.scaffold1185                 78580 2 +    226188 ---------TA
i papHam1.scaffold1185             C 0 C 0
s calJac3.chr16                     23628816 7 -  96796970 TAA----TTTA
i calJac3.chr16                    C 0 C 0
s saiBol1.JH378158                   9050830 7 -  16265076 TAA----TTTA
i saiBol1.JH378158                 C 0 C 0
s micMur1.scaffold_4913                90437 3 +    135929 C--------TA
i micMur1.scaffold_4913            C 0 C 0
s otoGar3.GL873523                  39380706 7 -  47749213 CAA----TTTA
i otoGar3.GL873523                 C 0 C 0
s tupBel1.scaffold_119809.1-330533     18928 7 +    330533 TAT----TTTG
i tupBel1.scaffold_119809.1-330533 C 0 C 0
s susScr3.chr4                      18486426 9 + 143465943 -AACGAATTT-
i susScr3.chr4                     C 0 I 1
s vicPac1.scaffold_13                1554338 9 +   2369290 -AACTAATAT-
i vicPac1.scaffold_13              C 0 I 1
s turTru2.JH479543                     74297 9 -    135452 -AACTAATGT-
i turTru2.JH479543                 C 0 I 1
s oviAri1.chr9                      68471110 9 - 100831284 -AACTAATGT-
i oviAri1.chr9                     C 0 I 1
s bosTau7.chr14                     63542590 9 -  81216349 -AAGCAGTTT-
i bosTau7.chr14                    C 0 I 1
s felCat5.chrF2                     64502870 5 +  82763536 -AA----TAT-
i felCat5.chrF2                    C 0 I 1
s canFam3.chr13                     20338972 5 +  63241923 -AA----TAT-
i canFam3.chr13                    C 0 I 1
s ailMel1.GL193711.1                  157041 5 -    529242 -AA----TAT-
i ailMel1.GL193711.1               C 0 I 1
s equCab2.chr9                      64366910 9 +  83561422 -AACTAGTAT-
i equCab2.chr9                     C 0 I 1
s myoLuc2.GL429784                   8893820 5 +  14577598 -AA----TAT-
i myoLuc2.GL429784                 C 0 I 1
s pteVam1.scaffold_9062                54184 5 +     66173 -AA----TGC-
i pteVam1.scaffold_9062            C 0 I 1
s loxAfr3.scaffold_8                67684933 2 +  85640724 ---------TA
i loxAfr3.scaffold_8               C 0 I 3
s triMan1.JH594628                   9784316 2 +  24477914 ---------TA
i triMan1.JH594628                 C 0 I 6
s dasNov3.JH579962                   3296945 2 +   3334091 ---------TA
i dasNov3.JH579962                 C 0 I 5
s choHof1.scaffold_1338                25017 2 +     46317 ---------TA
i choHof1.scaffold_1338            C 0 I 5
s danRer7.chr18                     16694233 2 +  49877488 --------TT-
i danRer7.chr18                    C 0 C 0
e echTel1.scaffold_246123               8997 1826 -     12816 I
e gorGor3.chr8                     121284328 8675 + 145327772 T
e melGal1.chr3                      88078472 9551 + 100405168 I
e sarHar1.chr2_GL841388_random        481984 12896 +   1237177 I
e melUnd1.JH556481                    782640 58368 +   3508697 I
e monDom5.chr3                     395438024 14746 + 527952102 I
e proCap1.scaffold_5125                54024 510 +     62060 I
e chrPic1.JH584538                    404458 7740 +   8176890 I
e galGal4.chr2                     136949488 65088 + 148809762 I

a score=1143199.000000
s mm10.chr15                        56691855  74 + 104043685 ATGAA--TGA------------------------------------------------ATCATTTTGC---ATAAGCTG-----CAC-G------A---CAAAAG---AC-------A----AAGA------TTTAAATTTTGG---GTTCTTTTCA-ACCCaatt
s rn5.chr7                          97078849  65 + 143501887 ATGAA--TGA------------------------------------------------GTCATCTTGC---ATAGGCTG-----GAG-G------A---CAAAGA---GC-------A----AAGA------TTTAAA------------GTTTTCA-ACCCAATT
i rn5.chr7                         C 0 C 0
s dipOrd1.scaffold_76283                1090 122 +      5145 ATGAA--CAAAAACCACTATGTCAGCATATATTCTTATTAATTCTGTAGACAAAAAATGTTAACTCAC---ACACGTTG-----GAA-G------G---AAAAGA------------A----AGCA------TTTAAAGTTTAG-GCGCTCTTTTCA-CATCAATT
i dipOrd1.scaffold_76283           I 8 C 0
s hetGla2.JH602048                   9048631  66 -  42145720 ATGAA--TGA------------------------------------------------GTCGATTTGC---ACACATTG-----GAA-A------GAAAAAAAGA------------A----AAAG------CTTAAA------------GTTCTCA-ACCCAATT
i hetGla2.JH602048                 C 0 C 0
s cavPor3.scaffold_95                5257807  59 -   5884597 ATGAA--CAA------------------------------------------------TTCAACTTGC---ACACACTG-----GAA-G------G---AAAAGA------------A----AAAT------TTAAGA------------GTTCTC---TTCAA--
i cavPor3.scaffold_95              C 0 C 0
s speTri2.JH393280                  21200241  64 -  46620681 ATGAA--TGA------------------------------------------------GTCAACTTGC---ACATATTG-----GAA-G------A---AAAAGGAGAAC-------A----AAAG------TT----------------CTTTTCA-ACCCAATT
i speTri2.JH393280                 C 0 C 0
s oryCun2.chr3                     137517538  75 + 155691105 GTGAA--TGA------------------------------------------------ATCAACCTTC---ACGTACTA-----GAATG------G---AAAGAA--GAA-------A----TAGT------TTTAAGTTTAAG----TTATTTTCA-GCCCAATT
i oryCun2.chr3                     C 0 C 0
s ochPri2.scaffold_3008                39218  78 +    168654 AGGAA--TGA------------------------------------------------GTCAGCCTTC---ACGTACCG-----GAA-G------G---AAAGAA--GAA-------A----AAAA------TTTCAATTTAAGAGCTTTTTTTAAA-ACCCAATT
i ochPri2.scaffold_3008            C 0 C 0
s hg19.chr8                        122651044  72 + 146364022 ATGAA--TGA------------------------------------------------GTCAACTTGC---ACACATTG-----GAA-G------G---AAATAA------------------AAA------TTTGGAATTTAA-AAGTTCTTTTCA-ATTCAAGT
i hg19.chr8                        C 0 C 0
s panTro4.chr8                     120288074  72 + 143986469 ATGAA--TGA------------------------------------------------GTCAACTTGC---ACACATTG-----GAA-G------G---AAATAA------------------AAA------TTTAGAATTTAA-AAGTTCTTTTCA-ATTCAAGT
i panTro4.chr8                     C 0 I 15
s ponAbe2.chr8                     129326093  72 + 153482349 ATGAA--TGA------------------------------------------------GTCAACTTGC---ACACATTG-----GAA-G------G---AAATAA------------------AAA------TTTAGAATTTAA-AAGTTCTTTTCA-ATTCAAGT
i ponAbe2.chr8                     C 0 C 0
s nomLeu2.GL397267                  35743845  72 +  48819562 ATGAA--TGA------------------------------------------------GTCAACTTGC---ACACATTG-----GAA-G------G---AAATAA------------------AAA------TTCAGAATTTAA-AAGTTCTTTTCA-ATTCAAGT
i nomLeu2.GL397267                 C 0 C 0
s rheMac3.chr8                     126565365  72 + 150158102 ATGAA--TGA------------------------------------------------GTCAACTTGC---ACACATTG-----GAA-G------G---AAATAA------------------AAA------TTTAGAATTTAA-AAGTTCTTCTCA-ATTCAGTA
i rheMac3.chr8                     C 0 C 0
s papHam1.scaffold1185                 78582  72 +    226188 ATGAA--TGA------------------------------------------------GTCAACTTGC---ACACATTG-----GAA-G------G---AAATAA------------------AAA------TTTAGAATTTAA-AAGTTCTTTTCA-ATTCAGTA
i papHam1.scaffold1185             C 0 C 0
s calJac3.chr16                     23628823  72 -  96796970 ATGCA--TGA------------------------------------------------ATCATCTTGC---ACACATTG-----GAA-G------G---AAATAA------------------AAA------TTTAGAATTTAA-AAGTTATTTTCA-ATTCAATA
i calJac3.chr16                    C 0 C 0
s saiBol1.JH378158                   9050837  72 -  16265076 ATGCA--CGA------------------------------------------------ATCAACTTGC---ACACATTG-----GAA-G------G---AAATAA------------------AAA------TTTAGAATTTCA-AAGTTCTTTTCA-ATTCAATA
i saiBol1.JH378158                 C 0 C 0
s micMur1.scaffold_4913                90440  68 +    135929 ATGAA--TGA------------------------------------------------GTCACCTTGC---ATACACTG----------------G---AAGAAA------------------AAG------TTCAGAATTTAA-GAGTTCTTTTCA-ACCCAAGA
i micMur1.scaffold_4913            C 0 C 0
s otoGar3.GL873523                  39380713  77 -  47749213 GTGAA--TGA------------------------------------------------GTCATCTAGC---ACATATTGGATAGAAA-A------G---AAGAAA------------------AAG------TTCAAAATTTAT-GAGTTCTTTTCA-TCCCAATT
i otoGar3.GL873523                 C 0 C 0
s tupBel1.scaffold_119809.1-330533     18935  81 +    330533 ATGAACCCGA------------------------------------------------GTCAATATTC---ACACATTG-----GAA-G------G---AAAAAC------------------AAGAAAAGTTTTGGAACCTAA-GAGTTCTTTTCATACTCAAAT
i tupBel1.scaffold_119809.1-330533 C 0 C 0
s susScr3.chr4                      18486436  75 + 143465943 ATGAA--TGG-------------------------------------------------TCCACTTGC---ACGTATTG-----GAA-T------G---AAAGGA------------AAA--AAAG------TTTAGAATTTAA-GAGTTCTTTACA-ACCCTATT
i susScr3.chr4                     I 1 C 0
s vicPac1.scaffold_13                1554348  70 +   2369290 ATGAA------------------------------------------------------TCAACCTGC---GCATACTG-----GAA-T------G---AAAGGA------------A----TAAG------TTTAGAATTCAA-GAGTTCTTTTCA-ACTCTATT
i vicPac1.scaffold_13              I 1 C 0
s turTru2.JH479543                     74307  78 -    135452 ATGAA--TGA------------------------------------------------GTCAATTTGC---ACAAATTG-----GAA-T------G---AAAGGA------------AAAACAAAG------TTTAGAAGTGAA-GAGTTCTTTTCA-AACCGATT
i turTru2.JH479543                 I 1 C 0
s oviAri1.chr9                      68471120  74 - 100831284 AGGAA--TGA------------------------------------------------ATGAATTTGC---ACACATTG-----GGG-T------G---AAAGGA------------A----AAAG------TTTAGAATTTAA-GAGTTCTTTTCA-ACTCTGTT
i oviAri1.chr9                     I 1 C 0
s bosTau7.chr14                     63542600  74 -  81216349 ATGAA--TGA------------------------------------------------TTCAACCTGT---GCATATTG-----GAA-T------G---AAAGGA------------A----AAAG------TTTAGAATTTAG-GAGTTCTTTTCA-AACCTATT
i bosTau7.chr14                    I 1 C 0
s felCat5.chrF2                     64502876  75 +  82763536 ATTAA--TGA------------------------------------------------GTCAATTTGC---ACACATTG-----GTA-T------G---AAAAGA------------A----AAAG-----TTTTAGAATTTAA-GTATTCTTTTCA-ATCCTATT
i felCat5.chrF2                    I 1 C 0
s canFam3.chr13                     20338978  74 +  63241923 ATGAA--TGA------------------------------------------------ATCAATCTGC---ACACATTG-----GAA-T------G---AAAAGA------------A----AATG------GTTAGATTTTAA-GTATTCCCTTCA-GTCCTGTT
i canFam3.chr13                    I 1 C 0
s ailMel1.GL193711.1                  157047  74 -    529242 ATGAA--TGA------------------------------------------------GTCAATTTCC---ACACATTG-----GAA-T------G---AAAAGA------------A----AATG------TTCAGAATTTAA-GTATTCTTTTCA-ATCCTATT
i ailMel1.GL193711.1               I 1 C 0
s equCab2.chr9                      64366920  74 +  83561422 ATGAA--TGA------------------------------------------------GTCAAGTTGC---ACACATTG-----GAA-T------G---AAAAGA------------C----AAAG------TTTAGAATTTAA-GAGTTCTTTTCA-ACCTTATT
i equCab2.chr9                     I 1 C 0
s myoLuc2.GL429784                   8893826  68 +  14577598 ACGAA--TGC------------------------------------------------ATCAAACTGC---ATACATTG-----GGA-T------G---GA---------------------AAAG------TTTAGAATTT-A-GAGTTCTTTTCA-ACCCTATC
i myoLuc2.GL429784                 I 1 C 0
s pteVam1.scaffold_9062                54190  72 +     66173 ATGAA--TGC------------------------------------------------GTCAACTTGCACGACACACAG-----GAA-T------G---AA---------------------AAAG------TGTAAAATTTAA-GAGTTCTTTTCA-ACCTCATT
i pteVam1.scaffold_9062            I 1 C 0
s eriEur1.scaffold_375845                  6  75 +     52675 ATGAA--TGA------------------------------------------------GTCAACTGGC---TTATAACA-----GAA-TTGCCCCG---AA---------------------AAGG------GCTAGAATTTAA-CAGTTAATTTCA-TCTCAAAT
i eriEur1.scaffold_375845          N 0 C 0
s loxAfr3.scaffold_8                67684938  73 +  85640724 ---AA--TAT------------------------------------------------GTCAACTTGT---ACACACTG-----GAA-T------A---AAATGA--GA--------A----AAAG------TGTAGAATTTAA-GAGCTTTTTTCA-ACCCAGTT
i loxAfr3.scaffold_8               I 3 C 0
s triMan1.JH594628                   9784324  75 +  24477914 ATGAA--TGT------------------------------------------------GTCGACTTGC---GAACATTG-----AAA-T------A---AAATGA--G---------A----AAAG------TTTAGAATTTAA-GAGTTCTTTTCA-ACCTAATT
i triMan1.JH594628                 I 6 C 0
s dasNov3.JH579962                   3296952  66 +   3334091 ATGAA--TGA------------------------------------------------GTCAACTTGC---ATACATTG-----GGA-T------A---AAGTGA--AAACGTTTAGA----AAAG------TTTAGA--------------------ATTCAATT
i dasNov3.JH579962                 I 5 C 0
s choHof1.scaffold_1338                25024  75 +     46317 ATGAA--TGA------------------------------------------------GTCAACTTGC---ACATATTG-----GAA-T------G---AAATGA--AGA-------A----AAAG------TTTAGAATTT---GATTTATTTTCC-ATTCAATT
i choHof1.scaffold_1338            I 5 C 0
s danRer7.chr18                     16694235  68 +  49877488 ACCAG--TGT------------------------------------------------ATTTTTTAAC---TTCAACTA-----CAC-C------T---CAAAAT-----------------AGAT------TTTGAAA------ATATTTTTTTTT-AAACAGTG
i danRer7.chr18                    C 0 C 0
e echTel1.scaffold_246123               8997 1826 -     12816 I
e gorGor3.chr8                     121284328 8675 + 145327772 T
e melGal1.chr3                      88078472 9551 + 100405168 I
e sarHar1.chr2_GL841388_random        481984 12896 +   1237177 I
e melUnd1.JH556481                    782640 58368 +   3508697 I
e monDom5.chr3                     395438024 14746 + 527952102 I
e proCap1.scaffold_5125                54024 510 +     62060 I
e chrPic1.JH584538                    404458 7740 +   8176890 I
e galGal4.chr2                     136949488 65088 + 148809762 I

a score=-272724.000000
s mm10.chr15                        56691929 20 + 104043685 attttttttt-----ttttttttGC--
s rn5.chr7                          97078914  8 + 143501887 ATCTTT-----------------GC--
i rn5.chr7                         C 0 C 0
s dipOrd1.scaffold_76283                1212  7 +      5145 CTCTT------------------AA--
i dipOrd1.scaffold_76283           C 0 C 0
s hetGla2.JH602048                   9048697  4 -  42145720 AT---------------------CC--
i hetGla2.JH602048                 C 0 C 0
s cavPor3.scaffold_95                5257866  4 -   5884597 AT---------------------CT--
i cavPor3.scaffold_95              C 0 C 0
s speTri2.JH393280                  21200305  4 -  46620681 CT---------------------GT--
i speTri2.JH393280                 C 0 C 0
s oryCun2.chr3                     137517613  7 + 155691105 CTTCA------------------GC--
i oryCun2.chr3                     C 0 C 0
s ochPri2.scaffold_3008                39296  7 +    168654 CTGCA------------------GC--
i ochPri2.scaffold_3008            C 0 C 0
s hg19.chr8                        122651116  3 + 146364022 ----------------------CAT--
i hg19.chr8                        C 0 C 0
s ponAbe2.chr8                     129326165  3 + 153482349 ----------------------CAT--
i ponAbe2.chr8                     C 0 C 0
s nomLeu2.GL397267                  35743917  3 +  48819562 ----------------------CAT--
i nomLeu2.GL397267                 C 0 C 0
s rheMac3.chr8                     126565437  5 + 150158102 --------------------GTCAC--
i rheMac3.chr8                     C 0 C 0
s papHam1.scaffold1185                 78654  5 +    226188 --------------------GTCAC--
i papHam1.scaffold1185             C 0 C 0
s calJac3.chr16                     23628895  5 -  96796970 --------------------GTCAT--
i calJac3.chr16                    C 0 C 0
s saiBol1.JH378158                   9050909  5 -  16265076 --------------------GTCGT--
i saiBol1.JH378158                 C 0 C 0
s micMur1.scaffold_4913                90508  7 +    135929 ------------------GTTCCAT--
i micMur1.scaffold_4913            C 0 C 0
s otoGar3.GL873523                  39380790  7 -  47749213 ------------------GTTTCAT--
i otoGar3.GL873523                 C 0 C 0
s tupBel1.scaffold_119809.1-330533     19016  8 +    330533 -----------------TCTTCCAT--
i tupBel1.scaffold_119809.1-330533 C 0 C 0
s susScr3.chr4                      18486511  4 + 143465943 ---------------------CTGT--
i susScr3.chr4                     C 0 I 936
s vicPac1.scaffold_13                1554418  4 +   2369290 ---------------------CTGT--
i vicPac1.scaffold_13              C 0 C 0
s turTru2.JH479543                     74385  4 -    135452 ---------------------CTGT--
i turTru2.JH479543                 C 0 C 0
s oviAri1.chr9                      68471194  4 - 100831284 ---------------------CCGT--
i oviAri1.chr9                     C 0 C 0
s bosTau7.chr14                     63542674  4 -  81216349 ---------------------CTAT--
i bosTau7.chr14                    C 0 C 0
s felCat5.chrF2                     64502951  4 +  82763536 ---------------------CTGT--
i felCat5.chrF2                    C 0 C 0
s canFam3.chr13                     20339052  4 +  63241923 ---------------------TTGT--
i canFam3.chr13                    C 0 C 0
s ailMel1.GL193711.1                  157121  4 -    529242 ---------------------CTGT--
i ailMel1.GL193711.1               C 0 C 0
s equCab2.chr9                      64366994  4 +  83561422 ---------------------CTGT--
i equCab2.chr9                     C 0 C 0
s myoLuc2.GL429784                   8893894  4 +  14577598 ---------------------CTAT--
i myoLuc2.GL429784                 C 0 C 0
s pteVam1.scaffold_9062                54262  4 +     66173 ---------------------CTGT--
i pteVam1.scaffold_9062            C 0 C 0
s eriEur1.scaffold_375845                 81  4 +     52675 ---------------------ATGT--
i eriEur1.scaffold_375845          C 0 C 0
s loxAfr3.scaffold_8                67685011  7 +  85640724 ------------------CTCCTGT--
i loxAfr3.scaffold_8               C 0 I 21
s triMan1.JH594628                   9784399  1 +  24477914 ------------------C--------
i triMan1.JH594628                 C 0 I 3
s dasNov3.JH579962                   3297018  7 +   3334091 ------------------CTCCAGT--
i dasNov3.JH579962                 C 0 I 8
s choHof1.scaffold_1338                25099  7 +     46317 ------------------CTCCTGT--
i choHof1.scaffold_1338            C 0 I 8
s danRer7.chr18                     16694303 20 +  49877488 -------GATGGTGGTTAAGTTTGTGG
i danRer7.chr18                    C 0 C 0
e echTel1.scaffold_246123               8997 1826 -     12816 I
e gorGor3.chr8                     121284328 8675 + 145327772 T
e panTro4.chr8                     120288146 15 + 143986469 I
e melGal1.chr3                      88078472 9551 + 100405168 I
e sarHar1.chr2_GL841388_random        481984 12896 +   1237177 I
e melUnd1.JH556481                    782640 58368 +   3508697 I
e monDom5.chr3                     395438024 14746 + 527952102 I
e proCap1.scaffold_5125                54024 510 +     62060 I
e chrPic1.JH584538                    404458 7740 +   8176890 I
e galGal4.chr2                     136949488 65088 + 148809762 I

a score=57815.000000
s mm10.chr15                        56691949 3 + 104043685 AAA
s rn5.chr7                          97078922 3 + 143501887 AAA
i rn5.chr7                         C 0 C 0
s dipOrd1.scaffold_76283                1219 3 +      5145 AAA
i dipOrd1.scaffold_76283           C 0 C 0
s hetGla2.JH602048                   9048701 3 -  42145720 AAA
i hetGla2.JH602048                 C 0 C 0
s cavPor3.scaffold_95                5257870 3 -   5884597 AAA
i cavPor3.scaffold_95              C 0 C 0
s speTri2.JH393280                  21200309 3 -  46620681 AAA
i speTri2.JH393280                 C 0 C 0
s oryCun2.chr3                     137517620 3 + 155691105 ACA
i oryCun2.chr3                     C 0 C 0
s ochPri2.scaffold_3008                39303 3 +    168654 ACA
i ochPri2.scaffold_3008            C 0 C 0
s hg19.chr8                        122651119 3 + 146364022 AGA
i hg19.chr8                        C 0 C 0
s ponAbe2.chr8                     129326168 3 + 153482349 AGA
i ponAbe2.chr8                     C 0 C 0
s nomLeu2.GL397267                  35743920 3 +  48819562 AGA
i nomLeu2.GL397267                 C 0 C 0
s rheMac3.chr8                     126565442 3 + 150158102 AGA
i rheMac3.chr8                     C 0 C 0
s papHam1.scaffold1185                 78659 3 +    226188 AGA
i papHam1.scaffold1185             C 0 C 0
s calJac3.chr16                     23628900 3 -  96796970 ATA
i calJac3.chr16                    C 0 C 0
s saiBol1.JH378158                   9050914 3 -  16265076 ATA
i saiBol1.JH378158                 C 0 C 0
s micMur1.scaffold_4913                90515 3 +    135929 AAC
i micMur1.scaffold_4913            C 0 C 0
s otoGar3.GL873523                  39380797 3 -  47749213 GAA
i otoGar3.GL873523                 C 0 C 0
s tupBel1.scaffold_119809.1-330533     19024 3 +    330533 AAA
i tupBel1.scaffold_119809.1-330533 C 0 C 0
s susScr3.chr4                     124835232 3 - 143465943 aaa
i susScr3.chr4                     I 4009 C 0
s vicPac1.scaffold_13                1554422 3 +   2369290 AAA
i vicPac1.scaffold_13              C 0 C 0
s turTru2.JH479543                     74389 3 -    135452 CAC
i turTru2.JH479543                 C 0 C 0
s oviAri1.chr9                      68471198 3 - 100831284 AAC
i oviAri1.chr9                     C 0 C 0
s bosTau7.chr14                     63542678 3 -  81216349 AAC
i bosTau7.chr14                    C 0 C 0
s felCat5.chrF2                     64502955 3 +  82763536 AAA
i felCat5.chrF2                    C 0 C 0
s canFam3.chr13                     20339056 3 +  63241923 AAA
i canFam3.chr13                    C 0 C 0
s ailMel1.GL193711.1                  157125 3 -    529242 AAA
i ailMel1.GL193711.1               C 0 C 0
s equCab2.chr9                      64366998 3 +  83561422 AAA
i equCab2.chr9                     C 0 C 0
s myoLuc2.GL429784                   8893898 3 +  14577598 AAA
i myoLuc2.GL429784                 C 0 C 0
s pteVam1.scaffold_9062                54266 3 +     66173 AAA
i pteVam1.scaffold_9062            C 0 C 0
s eriEur1.scaffold_375845                 85 3 +     52675 CAA
i eriEur1.scaffold_375845          C 0 C 0
s loxAfr3.scaffold_8                67685039 3 +  85640724 AAA
i loxAfr3.scaffold_8               I 21 I 201
s triMan1.JH594628                   9784403 3 +  24477914 AAA
i triMan1.JH594628                 I 3 C 0
s dasNov3.JH579962                   3297033 3 +   3334091 AAA
i dasNov3.JH579962                 I 8 C 0
s choHof1.scaffold_1338                25114 3 +     46317 AAA
i choHof1.scaffold_1338            I 8 C 0
s danRer7.chr18                     16694323 1 +  49877488 A--
i danRer7.chr18                    C 0 C 0
e echTel1.scaffold_246123               8997 1826 -     12816 I
e gorGor3.chr8                     121284328 8675 + 145327772 T
e panTro4.chr8                     120288146 15 + 143986469 I
e melGal1.chr3                      88078472 9551 + 100405168 I
e sarHar1.chr2_GL841388_random        481984 12896 +   1237177 I
e melUnd1.JH556481                    782640 58368 +   3508697 I
e monDom5.chr3                     395438024 14746 + 527952102 I
e proCap1.scaffold_5125                54024 510 +     62060 I
e chrPic1.JH584538                    404458 7740 +   8176890 I
e galGal4.chr2                     136949488 65088 + 148809762 I

a score=-34057.000000
s mm10.chr15                        56691952 4 + 104043685 A-TGT
s rn5.chr7                          97078925 4 + 143501887 A-TAT
i rn5.chr7                         C 0 C 0
s dipOrd1.scaffold_76283                1222 4 +      5145 T-TTT
i dipOrd1.scaffold_76283           C 0 C 0
s hetGla2.JH602048                   9048704 4 -  42145720 C-TTT
i hetGla2.JH602048                 C 0 C 0
s cavPor3.scaffold_95                5257873 4 -   5884597 A-CTT
i cavPor3.scaffold_95              C 0 C 0
s speTri2.JH393280                  21200312 4 -  46620681 A-TCT
i speTri2.JH393280                 C 0 C 0
s oryCun2.chr3                     137517623 3 + 155691105 A--TT
i oryCun2.chr3                     C 0 C 0
s ochPri2.scaffold_3008                39306 4 +    168654 A-CTT
i ochPri2.scaffold_3008            C 0 C 0
s hg19.chr8                        122651122 4 + 146364022 A-CTA
i hg19.chr8                        C 0 I 4
s ponAbe2.chr8                     129326171 4 + 153482349 A-GTA
i ponAbe2.chr8                     C 0 I 8
s nomLeu2.GL397267                  35743923 4 +  48819562 A-CTA
i nomLeu2.GL397267                 C 0 I 8
s rheMac3.chr8                     126565445 4 + 150158102 A-CTA
i rheMac3.chr8                     C 0 I 8
s papHam1.scaffold1185                 78662 4 +    226188 A-CTA
i papHam1.scaffold1185             C 0 I 8
s calJac3.chr16                     23628903 4 -  96796970 A-GCA
i calJac3.chr16                    C 0 I 8
s saiBol1.JH378158                   9050917 4 -  16265076 A-GCA
i saiBol1.JH378158                 C 0 I 8
s micMur1.scaffold_4913                90518 4 +    135929 A-TTT
i micMur1.scaffold_4913            C 0 C 0
s otoGar3.GL873523                  39380800 4 -  47749213 A-TCT
i otoGar3.GL873523                 C 0 C 0
s tupBel1.scaffold_119809.1-330533     19027 4 +    330533 A-TTT
i tupBel1.scaffold_119809.1-330533 C 0 C 0
s susScr3.chr4                     124835235 4 - 143465943 a-aaa
i susScr3.chr4                     C 0 C 0
s vicPac1.scaffold_13                1554425 4 +   2369290 A-TTT
i vicPac1.scaffold_13              C 0 C 0
s turTru2.JH479543                     74392 4 -    135452 A-TTT
i turTru2.JH479543                 C 0 C 0
s oviAri1.chr9                      68471201 4 - 100831284 A-TTT
i oviAri1.chr9                     C 0 C 0
s bosTau7.chr14                     63542681 4 -  81216349 A-TTT
i bosTau7.chr14                    C 0 C 0
s felCat5.chrF2                     64502958 4 +  82763536 A-TTT
i felCat5.chrF2                    C 0 C 0
s canFam3.chr13                     20339059 4 +  63241923 A-TTT
i canFam3.chr13                    C 0 C 0
s ailMel1.GL193711.1                  157128 4 -    529242 A-TTT
i ailMel1.GL193711.1               C 0 C 0
s equCab2.chr9                      64367001 4 +  83561422 A-TTT
i equCab2.chr9                     C 0 C 0
s myoLuc2.GL429784                   8893901 5 +  14577598 ATTTT
i myoLuc2.GL429784                 C 0 C 0
s pteVam1.scaffold_9062                54269 4 +     66173 A-TTT
i pteVam1.scaffold_9062            C 0 C 0
s eriEur1.scaffold_375845                 88 3 +     52675 A-TT-
i eriEur1.scaffold_375845          C 0 C 0
s triMan1.JH594628                   9784406 1 +  24477914 ----T
i triMan1.JH594628                 C 0 C 0
s dasNov3.JH579962                   3297036 4 +   3334091 A-TAT
i dasNov3.JH579962                 C 0 C 0
s choHof1.scaffold_1338                25117 4 +     46317 A-TCT
i choHof1.scaffold_1338            C 0 C 0
s danRer7.chr18                     16694324 1 +  49877488 ---T-
i danRer7.chr18                    C 0 C 0
e echTel1.scaffold_246123               8997 1826 -     12816 I
e gorGor3.chr8                     121284328 8675 + 145327772 T
e panTro4.chr8                     120288146 15 + 143986469 I
e loxAfr3.scaffold_8                67685042 201 +  85640724 I
e melGal1.chr3                      88078472 9551 + 100405168 I
e sarHar1.chr2_GL841388_random        481984 12896 +   1237177 I
e melUnd1.JH556481                    782640 58368 +   3508697 I
e monDom5.chr3                     395438024 14746 + 527952102 I
e proCap1.scaffold_5125                54024 510 +     62060 I
e chrPic1.JH584538                    404458 7740 +   8176890 I
e galGal4.chr2                     136949488 65088 + 148809762 I

a score=291402.000000
s mm10.chr15                        56691956 39 + 104043685 AAAATGT----CATCC---AT-----AAATAGGTTCCTGGGCTTGGATATG
s rn5.chr7                          97078929 42 + 143501887 AAACAGT----CATCCTCTAT-----AAATAGGTTCCTGGGCATGAATATT
i rn5.chr7                         C 0 C 0
s dipOrd1.scaffold_76283                1226 39 +      5145 TAAATGC----TGTCT---AC-----AAATCGGTTGAGGGGTATAGGTATG
i dipOrd1.scaffold_76283           C 0 I 4
s hetGla2.JH602048                   9048708 39 -  42145720 AAAAGGT----TATCT---AC-----AAATAGGTTGATAAGCACAGACATC
i hetGla2.JH602048                 C 0 C 0
s cavPor3.scaffold_95                5257877 39 -   5884597 AAAAGGT----TGTCT---AC-----AAATAGGGTGATAGGCACAGGTATG
i cavPor3.scaffold_95              C 0 C 0
s speTri2.JH393280                  21200316 36 -  46620681 AAAA-------TATCT---AC-----AAATATGTTGACGGGCGTAAATAGC
i speTri2.JH393280                 C 0 C 0
s oryCun2.chr3                     137517626 24 + 155691105 AAAATTT----CATCT---AC-----AAATAGGTTG---------------
i oryCun2.chr3                     C 0 C 0
s ochPri2.scaffold_3008                39310 39 +    168654 AAAACTT----CATCT---AC-----AAATAGGTTGGTAGCAATGGGTATT
i ochPri2.scaffold_3008            C 0 C 0
s hg19.chr8                        122651130 34 + 146364022 AAAATTG----TATCT---AC-----AAAGAGGTTGATGGACTTGG-----
i hg19.chr8                        I 4 C 0
s panTro4.chr8                     120288161 34 + 143986469 AAAATTG----TATCT---AC-----AAAGAGGTTGATGGACTTGG-----
i panTro4.chr8                     I 15 C 0
s ponAbe2.chr8                     129326183 34 + 153482349 AAAATTG----TATCT---AC-----AAAGAGGTTGACGGACTTGG-----
i ponAbe2.chr8                     I 8 C 0
s nomLeu2.GL397267                  35743935 34 +  48819562 AAAATTG----TGTCT---AC-----AAAGAGGTTGACGGACTTGG-----
i nomLeu2.GL397267                 I 8 C 0
s rheMac3.chr8                     126565457 34 + 150158102 AAAATTG----TATCT---AC-----GAAGAGGTTGACGGACTTGG-----
i rheMac3.chr8                     I 8 C 0
s papHam1.scaffold1185                 78674 34 +    226188 AAAATTG----TATCT---AC-----GAAGAGGTTGACGGACTTGG-----
i papHam1.scaffold1185             I 8 C 0
s calJac3.chr16                     23628915 34 -  96796970 AAAGCTG----TATCT---AC-----AACGAATTTGATGGACTTAG-----
i calJac3.chr16                    I 8 C 0
s saiBol1.JH378158                   9050929 34 -  16265076 AAAAGTG----TATCT---AC-----AAGGAATTCAATGGACTTAG-----
i saiBol1.JH378158                 I 8 C 0
s micMur1.scaffold_4913                90522 29 +    135929 -AA----------------AT-----AAATAGGTTGACAGACATAGTTATT
i micMur1.scaffold_4913            C 0 C 0
s otoGar3.GL873523                  39380804 29 -  47749213 -AA----------------AC-----AAATAAGTTGACGGGCATAGTTATT
i otoGar3.GL873523                 C 0 C 0
s tupBel1.scaffold_119809.1-330533     19031 34 +    330533 AAAATTT----GAACT---CT-----AAACAGGTTGATGGATATAT-----
i tupBel1.scaffold_119809.1-330533 C 0 C 0
s susScr3.chr4                     124835239 39 - 143465943 aaaaTTG----TATCT---AC-----AAACAATTTGATGGGCATAAATATT
i susScr3.chr4                     C 0 C 0
s vicPac1.scaffold_13                1554429 39 +   2369290 TAAATTG----TATCT---AC-----AAATAGTTTAATGGGCATAACTATT
i vicPac1.scaffold_13              C 0 C 0
s turTru2.JH479543                     74396 39 -    135452 TCAATTG----TATCT---AC-----AAATAGTTTGATGGGCATAACTATT
i turTru2.JH479543                 C 0 C 0
s oviAri1.chr9                      68471205 39 - 100831284 TAGATTG----TATCT---AT-----AAATTGTTTGATGGGCATAACNATN
i oviAri1.chr9                     C 0 C 0
s bosTau7.chr14                     63542685 40 -  81216349 TCAATTGT---TATCT---AC-----AAATAGTTTGATGGGCATAACTATT
i bosTau7.chr14                    C 0 C 0
s felCat5.chrF2                     64502962 39 +  82763536 AAAACAG----TATCT---AC-----AAATAATTTGATGGACACAAATATT
i felCat5.chrF2                    C 0 C 0
s canFam3.chr13                     20339063 39 +  63241923 AAAACCC----TATCT---AC-----AAACAATCTGACGGGCATAAATATC
i canFam3.chr13                    C 0 C 0
s ailMel1.GL193711.1                  157132 39 -    529242 AAAACCG----TATGT---AC-----AAACAGTTTGATGGGCATAAATATC
i ailMel1.GL193711.1               C 0 C 0
s equCab2.chr9                      64367005 39 +  83561422 AAAATTG----TATCT---AA-----AAATAGTTTGACGGGCATAAATATT
i equCab2.chr9                     C 0 C 0
s myoLuc2.GL429784                   8893906 38 +  14577598 AAAATTG----TATCT---AC-----AAAGAGTGTGATAGGCATAT-TAGT
i myoLuc2.GL429784                 C 0 C 0
s pteVam1.scaffold_9062                54273 39 +     66173 AAAATTG----TATCT---AC-----AAATGGTTTGATGGTCATATGTATT
i pteVam1.scaffold_9062            C 0 C 0
s eriEur1.scaffold_375845                 91 34 +     52675 -----GT----TGTCT---AC-----AAATAGTTGAGTAGGCACAAAATAT
i eriEur1.scaffold_375845          C 0 C 0
s triMan1.JH594628                   9784407 13 +  24477914 --------------------T-----TTAAAATTGTCT-------------
i triMan1.JH594628                 C 0 C 0
s dasNov3.JH579962                   3297040 30 +   3334091 --------------------ACCTGTTAAGAGTTGGGTGGTCA-AAATATT
i dasNov3.JH579962                 C 0 C 0
s choHof1.scaffold_1338                25121 26 +     46317 --------------------A-----TAAGAATCTGATGGTCATAAATATT
i choHof1.scaffold_1338            C 0 C 0
s danRer7.chr18                     16694325 38 +  49877488 -ATACTGTTAATATTG---AA-----TAATTTTTTGCTTGGCATATA----
i danRer7.chr18                    C 0 C 0
e echTel1.scaffold_246123               8997 1826 -     12816 I
e gorGor3.chr8                     121284328 8675 + 145327772 T
e loxAfr3.scaffold_8                67685042 201 +  85640724 I
e melGal1.chr3                      88078472 9551 + 100405168 I
e sarHar1.chr2_GL841388_random        481984 12896 +   1237177 I
e melUnd1.JH556481                    782640 58368 +   3508697 I
e monDom5.chr3                     395438024 14746 + 527952102 I
e proCap1.scaffold_5125                54024 510 +     62060 I
e chrPic1.JH584538                    404458 7740 +   8176890 I
e galGal4.chr2                     136949488 65088 + 148809762 I

a score=-141483.000000
s mm10.chr15                        56691995 14 + 104043685 TGT-TTTAGCTC--ATT---
s rn5.chr7                          97078971 14 + 143501887 TGT-TTTAGCTC--ATT---
i rn5.chr7                         C 0 C 0
s dipOrd1.scaffold_76283                1269 14 +      5145 TGT-TCTAGCTT--CGT---
i dipOrd1.scaffold_76283           I 4 C 0
s hetGla2.JH602048                   9048747 14 -  42145720 TCT-TTGAGCCC--ATT---
i hetGla2.JH602048                 C 0 C 0
s cavPor3.scaffold_95                5257916 14 -   5884597 CGC-TTGAGGCC--CTT---
i cavPor3.scaffold_95              C 0 C 0
s speTri2.JH393280                  21200352 14 -  46620681 TGT-TCTTGCCC--ATT---
i speTri2.JH393280                 C 0 C 0
s oryCun2.chr3                     137517650 14 + 155691105 --T-TTTAGCTCTAAAG---
i oryCun2.chr3                     C 0 C 0
s ochPri2.scaffold_3008                39349 16 +    168654 TAT-CTCAGACCCAAAT---
i ochPri2.scaffold_3008            C 0 C 0
s hg19.chr8                        122651164  2 + 146364022 ---------------AT---
i hg19.chr8                        C 0 C 0
s panTro4.chr8                     120288195  2 + 143986469 ---------------AT---
i panTro4.chr8                     C 0 C 0
s ponAbe2.chr8                     129326217  2 + 153482349 ---------------AT---
i ponAbe2.chr8                     C 0 C 0
s nomLeu2.GL397267                  35743969  2 +  48819562 ---------------AT---
i nomLeu2.GL397267                 C 0 C 0
s rheMac3.chr8                     126565491  2 + 150158102 ---------------AT---
i rheMac3.chr8                     C 0 C 0
s papHam1.scaffold1185                 78708  2 +    226188 ---------------AT---
i papHam1.scaffold1185             C 0 C 0
s calJac3.chr16                     23628949  2 -  96796970 ---------------AG---
i calJac3.chr16                    C 0 C 0
s saiBol1.JH378158                   9050963  2 -  16265076 ---------------AT---
i saiBol1.JH378158                 C 0 C 0
s micMur1.scaffold_4913                90551 14 +    135929 TGT-TCTAGTTC--ATT---
i micMur1.scaffold_4913            C 0 C 0
s otoGar3.GL873523                  39380833 14 -  47749213 TGT-TCCAGTCC--ATT---
i otoGar3.GL873523                 C 0 C 0
s tupBel1.scaffold_119809.1-330533     19065  2 +    330533 ---------------AT---
i tupBel1.scaffold_119809.1-330533 C 0 C 0
s susScr3.chr4                     124835278 14 - 143465943 TGT-TCTGGCCA--ATT---
i susScr3.chr4                     C 0 C 0
s vicPac1.scaffold_13                1554468 14 +   2369290 TGT-TGTACCCA--ATT---
i vicPac1.scaffold_13              C 0 C 0
s turTru2.JH479543                     74435 14 -    135452 TGT-TCTACCCA--ATT---
i turTru2.JH479543                 C 0 C 0
s oviAri1.chr9                      68471244 14 - 100831284 TNT-TNTANCCA--ANT---
i oviAri1.chr9                     C 0 C 0
s bosTau7.chr14                     63542725 14 -  81216349 TAT-TCTACCCA--ATT---
i bosTau7.chr14                    C 0 C 0
s felCat5.chrF2                     64503001 14 +  82763536 TGT-CCTAGCCA--ATT---
i felCat5.chrF2                    C 0 C 0
s canFam3.chr13                     20339102 15 +  63241923 TGTCCCTAGCCA--CAT---
i canFam3.chr13                    C 0 C 0
s ailMel1.GL193711.1                  157171 14 -    529242 TGT-CCTAGCCA--AAT---
i ailMel1.GL193711.1               C 0 C 0
s equCab2.chr9                      64367044 14 +  83561422 TGT-TCTAGCCA--ATT---
i equCab2.chr9                     C 0 C 0
s myoLuc2.GL429784                   8893944 14 +  14577598 TGT-TCTAGCCA--ATT---
i myoLuc2.GL429784                 C 0 C 0
s pteVam1.scaffold_9062                54312 14 +     66173 CGT-TCTAGTCA--ATT---
i pteVam1.scaffold_9062            C 0 C 0
s eriEur1.scaffold_375845                125 14 +     52675 TGT-TCTGGCCA--ATT---
i eriEur1.scaffold_375845          C 0 C 0
s loxAfr3.scaffold_8                67685243 14 +  85640724 TGT-TCTAGCCC--ATT---
i loxAfr3.scaffold_8               I 201 C 0
s triMan1.JH594628                   9784420 14 +  24477914 TGT-TCTAGACC--ATT---
i triMan1.JH594628                 C 0 C 0
s dasNov3.JH579962                   3297070 14 +   3334091 TGT-TCTAGCCC--ATT---
i dasNov3.JH579962                 C 0 C 0
s choHof1.scaffold_1338                25147 14 +     46317 TGT-TCTAGCTC--ATT---
i choHof1.scaffold_1338            C 0 I 1149
s danRer7.chr18                     16694363 10 +  49877488 --------AACC--ATTGTT
i danRer7.chr18                    C 0 C 0
e echTel1.scaffold_246123               8997 1826 -     12816 I
e gorGor3.chr8                     121284328 8675 + 145327772 T
e melGal1.chr3                      88078472 9551 + 100405168 I
e sarHar1.chr2_GL841388_random        481984 12896 +   1237177 I
e melUnd1.JH556481                    782640 58368 +   3508697 I
e monDom5.chr3                     395438024 14746 + 527952102 I
e proCap1.scaffold_5125                54024 510 +     62060 I
e chrPic1.JH584538                    404458 7740 +   8176890 I
e galGal4.chr2                     136949488 65088 + 148809762 I

a score=180375.000000
s mm10.chr15                        56692009 14 + 104043685 CCA----------CG-GAAATACAC
s rn5.chr7                          97078985 14 + 143501887 CCA----------TG-GAAATGCAT
i rn5.chr7                         C 0 C 0
s dipOrd1.scaffold_76283                1283 14 +      5145 GTA----------TT-AAAAAAAAT
i dipOrd1.scaffold_76283           C 0 C 0
s hetGla2.JH602048                   9048761 14 -  42145720 ATA----------CA-GAAATACAT
i hetGla2.JH602048                 C 0 C 0
s cavPor3.scaffold_95                5257930  5 -   5884597 GTA----------CA----------
i cavPor3.scaffold_95              C 0 C 0
s speTri2.JH393280                  21200366 14 -  46620681 CTA----------TA-Gaaatatat
i speTri2.JH393280                 C 0 C 0
s oryCun2.chr3                     137517664 13 + 155691105 TTA----------CA-GAAATT-AT
[truncated: 464,701 more chars]
